# 1     **The histone variant macroH2A1.1 regulates RNA Polymerase II paused genes** 2                     **within defined chromatin interaction landscapes.**

3  
4 Ludmila Recoules<sup>1</sup>, Alexandre Heurteau<sup>1</sup>, Flavien Raynal<sup>1</sup>, Nezh Karasu<sup>4</sup>, Fatima Moutahir<sup>1</sup>,  
5 Fabienne Bejjani<sup>3</sup>, Isabelle Jariel-Encontre<sup>3</sup>, Olivier Cuvier<sup>1^</sup>, Thomas Sexton<sup>4</sup>, Anne-Claire  
6 Lavigne<sup>1\*</sup> and Kerstin Bystricky<sup>1,2\*</sup>.

7  
8 <sup>1</sup> Centre de Biologie Intégrative (CBI), Université de Toulouse, CNRS, UPS, F-31062 Toulouse,  
9 France. <sup>1^</sup> Chromatin Dynamics FRM team.

10 <sup>2</sup> Institut Universitaire de France (IUF).

11 <sup>3</sup> Institut de Génétique Moléculaire de Montpellier, CNRS, UMR5535, Equipe Labellisée Ligue  
12 Nationale contre le Cancer, F-34293, France.

13 <sup>4</sup> Institut de génétique et de biologie moléculaire et cellulaire (IGBMC) Illkirch, France; CNRS  
14 UMR7104, Illkirch, France; INSERM U1258, Illkirch, France ; University of Strasbourg, Illkirch,

15

16 \*Corresponding authors.

17

18 E-mails: [kerstin.bystricky@univ-tlse3.fr](mailto:kerstin.bystricky@univ-tlse3.fr) ; [anne-claire.lavigne@univ-tlse3.fr](mailto:anne-claire.lavigne@univ-tlse3.fr)

19

## 20     **Abstract**

21             The histone variant macroH2A1.1 (mH2A1.1) plays a role in cancer development and  
22 metastasis-related processes. To determine the underlying molecular mechanisms, we  
23 mapped genome-wide localization of endogenous mH2A1.1 in the human breast cancer cell  
24 MDA-MB 231. We demonstrate that mH2A1.1 specifically binds to active promoters and  
25 enhancers in addition to facultative heterochromatin. Selective knock-down of mH2A1.1  
26 deregulates expression of hundreds of highly active genes. Depending on the chromatin  
27 landscape, mH2A1.1 acts through two distinct molecular mechanisms. The first is to limit  
28 excessive transcription in a predefined environment and relies on domain recruitment of  
29 mH2A1.1 at the promoter and gene body. The second mechanism is specific to RNA Pol II (Pol  
30 II) paused genes. It requires recruitment of mH2A1.1 restricted to the TSS of these genes.  
31 Moreover, we show that these processes occur in a predefined local 3D genome organization  
32 and are largely independent of enhancer-promoter looping. Among the genes activated by  
33 mH2A1.1, genes regulating mammary tumor cell migration are mostly dependent on Pol II  
34 release for their expression level, unlike other categories of mH2A1.1-regulated genes. We  
35 thus identified an intriguing new mode of transcriptional regulation by mH2A1.1 and propose  
36 that mH2A1.1 serves as a transcriptional modulator with a potential role in assisting the  
37 conversion of promoter-locked RNA polymerase II into a productive and elongated Pol II.

38

## 39 Introduction

40

41 Histone post-translational modifications, DNA-binding factors and architectural  
42 proteins regulate genome organization and dynamics (Luger et al., 2012; Venkatesh &  
43 Workman, 2015). In addition, histone variants replace canonical histones in a locus-specific  
44 manner, which endows chromatin with properties required to fine-tune DNA accessibility and  
45 functions (Buschbeck & Hake, 2017).

46

47 Among the histone variants, macroH2A1 (mH2A1), a vertebrate-specific (Pehrson &  
48 Fuji, 1998; Rivera-Casas et al., 2016) histone H2A variant, is composed of an N-terminal “H2A-  
49 like” domain (64 % identical to H2A) and a C-terminal 25 kDa “macro” domain. These two  
50 domains are joined by an unstructured 41 amino acid long “linker” domain that positions the  
51 macro domain outside of the nucleosome (Gamble & Kraus, 2010). Expression of the highly  
52 conserved *H2AFY* gene produces two splicing isoforms, mH2A1.1 and mH2A1.2, whose  
53 sequences differ in a 30 amino-acid region within the macro domain (Gamble & Kraus, 2010).

54

55 mH2A1 was originally found to be enriched on the transcriptionally silent X  
56 chromosome (Costanzi & Pehrson, 1998). mH2A1 is also present at autosomes, forming large  
57 domains in association with histone marks associated with heterochromatin, such as  
58 H3K27me3 and H3K9me3 (Douet et al., 2017; Gamble et al., 2010; Sun et al., 2018). *In vitro*  
59 studies have demonstrated that nucleosomal mH2A1 interferes with binding of the  
60 transcription factor NF- $\kappa$ B, inhibits nucleosome sliding by the remodeling complex SWI/SNF  
61 and initiation of RNA polymerase II (Pol II) transcription (Angelov et al., 2003; Doyen et al.,  
62 2006). Therefore, mH2A1 is generally believed to play a role in transcriptional repression.  
63 However, in many cases, the presence of mH2A1 correlates also with active transcription of a  
64 subset of genes (Changolkar et al., 2010; H. Chen et al., 2014; Dell’Orso et al., 2016; Gamble  
65 et al., 2010; Podrini et al., 2015; Wan et al., 2017). Thus, the roles of mH2A1 in regulating gene  
66 expression are seemingly contradictory and the underlying mechanisms are still not well  
67 characterized.

68

69 The two mH2A1 splice variants exhibit tissue- and cell-specific expression patterns  
70 (Posavec Marjanović et al., 2017). In normal cells, the mH2A1.2 isoform appears ubiquitously  
71 expressed (Cantariño et al., 2013; J C Sporn et al., 2009; Judith C Sporn & Jung, 2012) while  
72 mH2A1.1 is only expressed in differentiated cells with low proliferation rates (Cantariño et al.,  
73 2013; J C Sporn et al., 2009; Judith C Sporn & Jung, 2012). Notably, the mH2A1.1 “macro”  
74 domain can bind NAD<sup>+</sup> metabolites (Kustatscher et al., 2005) and interact with the DNA-  
75 damage repair and chromatin remodeling factor PARP1 (Poly-(ADP-Ribose) Polymerase 1) (H.  
76 Chen et al., 2014; Marjanović et al., 2018; Ouararhni et al., 2006; Ray Chaudhuri &  
77 Nussenzweig, 2017). Interaction between mH2A1.1 and PARP1 was shown to be important  
78 during DNA damage, stress responses (Kim et al., 2018; Xu et al., 2012), mitochondrial  
79 respiratory capacity (Marjanović et al., 2018) and transcription (H. Chen et al., 2014; Ouararhni

80 et al., 2006) in fibroblast and epithelial cancerous cells. In tumors, expression of the mH2A1.1  
81 isoform is frequently reduced compared to normal tissues, suggesting that this isoform is a  
82 tumor suppressor (Cantariño et al., 2013; A.-C. Lavigne et al., 2014; Judith C Sporn & Jung,  
83 2012). Interestingly, in immortalized human mammary epithelial cells, mH2A1 interferes with  
84 the epithelial-mesenchymal transition (EMT), and its reciprocal, the mesenchymal-epithelial  
85 transition (MET) processes required for metastases development in a tumor context (Hodge  
86 et al., 2018; Pliatska et al., 2018). However, in highly metastatic cancers such as triple-negative  
87 breast cancers (TNBCs), increased expression levels of mH2A1.1 correlate with poor prognosis  
88 (A.-C. Lavigne et al., 2014). The role of macroH2A1.1 in controlling the properties of tumor  
89 cells could be dependent on cellular context and remains to be clarified.

90 In this work, we identified and characterized the role of mH2A1.1 in the regulation of  
91 gene expression in TNBC cells. We found that mH2A1.1 modulates the expression of hundreds  
92 of highly expressed genes, while mH2A1.1 deficiency does not affect the expression of silent  
93 or low expressed genes. Many of these mH2A1.1-regulated genes are involved in cytoskeletal  
94 organization, certainly giving mH2A1.1 its role in controlling the migratory properties of these  
95 tumor cells. This transcriptional function of mH2A1.1 is however bifunctional, with inhibitory  
96 or stimulatory of target gene. Although not requiring ad-hoc rewiring of promoter-enhancer  
97 contacts, this functional dichotomy clearly depends on the chromatin landscape in which  
98 these genes are located and relies on differential recruitment of mH2A1.1. The activating  
99 effect of mH2A1.1 requires tight recruitment of mH2A1.1 to the TSS of related genes.  
100 Conversely, genes inhibited by mH2A1.1 recruit this histone variant over larger domains,  
101 present further upstream and downstream of the TSS. Mechanistically, we determined that  
102 the expression level of mH2A1.1-activated genes is dependent on the Pol II pause process.  
103 Deficiency in mH2A1.1 affects Pol II turnover at their TSS, potentially by inhibiting the release  
104 of paused Pol II. Our work identifies and clarifies for the first time the ambivalence of the  
105 transcriptional functions of mH2A1.1 in cancer cells, linking its recruitment type to its mode  
106 of action.

107

## 108 Results

109

110 **mH2A1.1 regulates expression of hundreds of genes.** In order to characterize the function of  
111 mH2A1.1 in triple negative breast cancer (TNBC), we performed RNA-seq data in the MDA-  
112 MB231 cell line which expresses mH2A1.1 at higher levels than other types of breast cancer  
113 cell lines (**S1A, B Fig**) (A.-C. Lavigne et al., 2014). We compared gene expression levels between  
114 WT cells and cells in which the mH2A1.1 isoform but not mH2A1.2 protein expression was  
115 abolished by RNAi (KD, **Fig. 1A; S1C-E Fig**). Among the 945 genes whose expression was  
116 significantly modified in the mH2A1.1 KD cells, 533 genes (56.3%) were down-regulated  
117 (called mH2A1.1-activated genes or AG) and 412 genes (43.7%) were up-regulated (called  
118 mH2A1.1-repressed genes or RG) (**Fig 1A, S1 Table**). In general, gene expression changes  
119 induced by mH2A1.1 depletion are moderate (**Fig 1A**). Altered gene expression was confirmed

120 by RT-qPCR on a subset of genes using two different siRNAs directed against mH2A1.1 (**S1F-H**  
121 **Fig**). All mH2A1.1-regulated genes, both RG and AG, were found among the moderately to  
122 highly expressed genes in WT MBA-MB231 cells (**Fig 1B, C**). Silenced genes in MDA-MB231  
123 cells were not activated upon mH2A1.1 depletion (**Fig 1B, C**). We concluded that mH2A1.1  
124 participates in fine-tuning actively transcribed genes expression. We next asked if the role of  
125 mH2A1.1 variant in controlling expression of active genes depends on its association with  
126 certain genomic regions including gene regulatory regions and specific epigenetic contexts.

127 **mH2A1.1 associates with gene regulatory regions.** We developed a ChIP-grade polyclonal  
128 antibody that exclusively recognizes mH2A1.1 (Ab  $\alpha$ mH2A1.1) (**S2 Table and S2A-D Fig**) and  
129 generated ChIP-seq data of mH2A1.1 (**S3 Table**). The obtained dataset was compared to the  
130 one obtained using a commercially available ChIP-grade antibody (Ab37264, Ab  $\alpha$ mH2A1)  
131 directed against total mH2A1 (**S2, S3 Tables and S2E-G Fig**). The two datasets were highly  
132 similar with a Pearson coefficient correlation (PCC) of 0.92 (**Fig 1D**). Therefore, we decided to  
133 conserved common peaks between the two ChIP-seq data for further analysis (Materials and  
134 Methods). We identified 11.849 mH2A1.1 peaks, covering  $\approx 7\%$  of the genome. Analysis of  
135 the genomic distribution of mH2A1.1 showed that the vast majority of mH2A1.1 peaks  
136 correspond to annotated promoters (TSS  $\pm 1$  kb), while 22% of mH2A1.1 peaks were  
137 associated with distal intergenic regions (**Fig 1E**). We confirmed the enrichment of mH2A1.1  
138 in a subset of regions corresponding to ChIP-seq peaks by ChIP-qPCR in WT cells, as well as its  
139 decrease in mH2A1.1 KD cells (two mH2A1.1-specific RNAi), using either mH2A1.1 or mH2A1-  
140 specific antibodies (**S3 Fig**).

141 **mH2A1.1 binds promoters of its target genes.** We next asked if mH2A1.1 binding occurred in  
142 specific chromatin environments. Genome-wide, we analyzed the correlation between  
143 mH2A1.1 and a subset of heterochromatin marks (H3K9me3, H3K27me3, H2AK119ub),  
144 chromatin-bound components (Pol II, BRD4, RING1B, PARP1, PCGF2) as well as euchromatin  
145 marks (H3K4me1, H3K4me3, H3K36me3, H3K27ac, H3.3) (**Fig 1D**). mH2A1.1 positively  
146 correlated with its well documented partner PARP1 in the MDA-MB231 cell line (**Fig 1D**) (PCC  
147 of 0.47) (H. Chen et al., 2014). As expected, mH2A1.1 (but mainly total mH2A1) also associated  
148 with broad H3K27me3-marked chromatin domains (PCC of 0.25 for mH2A1.1 & 0.40 for  
149 mH2A1) (**Fig 1D, S4A-B Fig**). In this TNBC cell line, H3K9me3 is known to be overrepresented  
150 (Segal et al., 2018; Yokoyama et al., 2013), explaining its largely overlaps with mH2A1.1  
151 binding at H3K27me3-marked domains (**S4A Fig**). Interestingly, we found that in  
152 heterochromatin domains comprising both H3K9me3 and H3K27me3, the level of the two  
153 histone marks tended to be inversely proportional (**S4B-C Fig**). Moreover, we found that high  
154 H3K27me3-H3K9me3 difference is mainly associated with genomic regions whereas low  
155 H3K27me3-H3K9me3 difference is more associated with intergenomic regions (**S4D Fig**). We  
156 propose that in this cell line, in which H3K9me3 is over-present, difference in the intensity  
157 signal between H3K27me3 and H3K9me3 could be used to distinguish “facultative-like”

158 heterochromatin and “constitutive-like” heterochromatin. To decipher whether mH2A1.1  
159 preferentially overlaps with H3K9me3- or H3K27me3-marked heterochromatin domains, we  
160 analyzed its association depending on the difference in the signal intensity of both marks. We  
161 found that mH2A1.1 (and PARP1) binding were proportional to the abundance of H3K27me3  
162 minus H3K9me3 (**S4B, S4E, S4F Fig**), indicating that these two proteins predominantly  
163 associate with “facultative-like heterochromatin” in this TNBC breast cancer cell.  
164

165 When specifically examining the chromatin landscape at promoters (TSS +/- 1kb), we  
166 found that mH2A1.1 enrichment correlated with H3K4me3 and H3K27ac, as well as with BRD4,  
167 H3.3 and Pol II binding (**Fig 2A, 2B & S5A, S5B Fig**), suggesting a role for mH2A1.1 in  
168 transcription initiation-regulated processes. At promoters, mH2A1.1 distribution inversely  
169 coincided with heterochromatin marks (**Fig 2A & S5A, S5B Fig**). We further determined that  
170 enrichment of mH2A1.1 centered at the TSS was proportional to the level of transcription (**Fig**  
171 **2C-2D; S5C-E Fig**). The profile of mH2A1.1 binding was greatest at the TSS of expressed genes  
172 and similar to the one of Pol II at the NFR, bordered by H3K27ac marked nucleosome regions,  
173 but larger than that of Pol II (**Fig 2E, S5F, S5G Fig**).  
174

175 We next questioned whether this profile was linked to the mechanism by which  
176 mH2A1.1 regulates gene expression. To this end, we separately determined mH2A1.1 binding  
177 at genes repressed or activated (RG and AG) by mH2A1.1. At both gene categories, mH2A1.1  
178 was highly enriched at the TSS (+/- 2 kb) (**Fig 3A-B**). However, mH2A1.1 binding was restricted  
179 to the TSS of mH2A1.1 AGs, while it associated both with promoter regions and the gene  
180 bodies of mH2A1.1 RGs (**Fig 3**). mH2A1.1 association correlated with the level of binding of  
181 Pol II, H3.3 and BRD4 (**Fig 3C**). Interestingly at RGs, we detected Pol II at the promoter and  
182 over the elongation-characteristic H3K36me-marked gene body (**Fig 3B; S6 Fig**). At AGs, Pol II  
183 binding was essentially limited to the TSS. Thus, the Pol II distribution also discriminates both  
184 type of mH2A1.1-regulated genes. To note, although these genes are expressed, RING1B,  
185 PCGF2 and H2AK119ub, PRC1 subunits and associated modification, are present on RG-  
186 genomic regions (**S7 Fig**).

187 **mH2A1.1 promotes gene expression of Pol II paused genes.** The binding pattern of Pol II at  
188 mH2A1.1 AGs was reminiscent of Pol II paused genes (Adelman & Lis, 2012). To confirm this,  
189 we calculated the Pol II pausing index (PI) for transcribed genes using Pol II ChIP-seq data as  
190 described in (Adelman & Lis, 2012). Briefly, the pausing index corresponds to the ratio  
191 between total Pol II density in the promoter-proximal region (from -30 bp to + 300 bp around  
192 TSS) and total Pol II density in the transcribed region (from + 300 bp downstream TSS to TES).  
193 We plotted the ChIP-seq signal of Pol II and H3K36me3 around TSS +/- 10 kbp for each gene  
194 ranked according to their pausing index (**Fig 4A**). In agreement with the literature (Elrod et al.,  
195 2019), the level of H3K36me3 was greater over the body of genes with low PI compared to  
196 genes with high PI (**Fig 4A, and S8A**). We further observed that confinement of mH2A1.1 to  
197 the TSS and its absence from the gene body was characteristic of genes with a high PI (**Fig 4A,**  
198 **and S8A**). In agreement, the width of mH2A1.1 peaks overlapping with TSSs, as well as that of



199 Pol II peaks, correlated negatively with the PI (**S8B-C Fig**). H3.3 follows the same binding profile  
200 as mH2A1.1. BRD4, RING1B and PARP1 were mainly enriched at the TSS, slightly more at high  
201 PI-genes (**Fig 4A, S8A and S9**).

202  
203 The majority of mH2A1.1-AGs (85%) have a pausing index greater than 2 (**Fig S9C**), a PI  
204 value that can be used as a threshold to distinguish paused from not paused genes (Day et al.,  
205 2016). In agreement, the average PI of these genes was significantly higher than any other  
206 gene category tested (**Fig 4B-D**). At the difference, RGs are enriched in low PI-marked genes  
207 (**Fig 4B-C**). Furthermore, ChIPqPCR analysis of Pol II at three mH2A1.1-activated genes (*RBL1*,  
208 *GTF2H3* and *E2F3*) showed that the amount of Pol II at promoter regions was multiplied by a  
209 ~3-fold factor upon siRNA reduction of mH2A1.1 (**Fig 4E and S10A**). On average, we observe  
210 that depletion of mH2A1.1 induces an increase in the PI of *RBL1*, *GTF2H3*, and *E2F3* genes by  
211 a factor of 1.4, 1.6, and 1.7, respectively. These results suggest that mH2A1.1 may enhance  
212 gene expression by promoting Pol II pause release.

213  
214 **mH2A1.1 binds enhancers.** In addition to promoters, mH2A1.1 also associates with intergenic  
215 regions (**Fig 1E**). Genome-wide, mH2A1.1 binding highly correlated with H3K4me1 (PCC of  
216 0.55) and to a lesser extent with H3K27ac (PCC of 0.18), two chromatin marks which  
217 characterize enhancer regions (Creyghton et al., 2010) (**Fig 1D**). In agreement, we found that  
218 mH2A1.1 binding was significantly enriched at enhancers (Fisher exact test: p-value <  $2.2 \times 10^{-16}$   
219 and odd ratio = 5.23) (**Fig 5A-B**). Enhancers bound by mH2A1.1 were further characterized  
220 by strong association of H3.3, Pol II, BRD4 and RING1B, which are marks of active enhancers  
221 (P. Chen et al., 2013; Lee et al., 2017) (**Fig 5C and S11A-B**). Strikingly, mH2A1.1-bound regions  
222 frequently formed large domains comprising a group of enhancers marked with H3K27ac (**Fig**  
223 **5D**), which correspond to super-enhancers (Lovén et al., 2013; Whyte et al., 2013) (Fisher  
224 exact test: p-value <  $2.2 \times 10^{-16}$  and odd ratio = 7.35) (**Fig 5E and S11C**). Overall, these results  
225 show that mH2A1.1 binds enhancers and super-enhancers in association with BRD4 and  
226 RING1B.

227  
228 **mH2A1.1-target genes regulation does not require changes in enhancer-promoter looping.**  
229 Because mH2A1.1 binds enhancer and promoter regions (**Fig 3 and Fig 5**), an attractive  
230 hypothesis was that mH2A1.1 mediates chromatin folding. To test this hypothesis, we applied  
231 promoter capture HiC (PCHiC) using a collection of 19.225 promoter sequence fragments as  
232 bait (Schoenfelder et al., 2018) in WT and mH2A1.1 KD cells. Genomic interactions between  
233 promoters and other genomic regions were called by ChiCMaxima (Ben Zouari et al., 2019).  
234 We aggregated the total number of detected interactions per gene for mH2A1.1-activated, -  
235 repressed or -independent genes. For each category, the average number of interactions  
236 detected per gene was identical in control and mH2A1.1 KD cells (**Fig 6A**). The average  
237 intensity of these interactions with adjacent genomic regions (+/- 1.5 Mb around the gene)  
238 (**Fig 6B-D**) or of interactions with enhancer regions (**S12A Fig**) was also unaffected in the  
239 absence of mH2A1.1. Hence, chromatin interaction landscapes at mH2A1.1-regulated genes

240 do not appear to require mH2A1.1. Yet, quantification of the PCHiC interactions showed that  
241 mH2A1.1-AGs have on average a greater number of interactions than mH2A1.1-RGs (**Fig 6A,**  
242 **6E**). However, interactions at mH2A1.1-AGs showed weaker signal intensities (**Fig 6B, S12A**),  
243 suggesting that AG and RG reside within two types of interaction landscapes.

244  
245 mH2A1.1 is enriched at the enhancers associated with RGs than those associated with  
246 AGs (**S12B-C**). Active chromatin marks and co-activators are also more abundant to RGs  
247 related enhancers than AGs related ones (H3.3, Pol II, BRD4) (**S12B-C, S13 Fig**) in agreement  
248 with the fact that these genes are in average more transcribed than AGs. Although, loss of  
249 mH2A1.1 did not induce any global changes in promoter contact numbers or frequencies,  
250 closer inspection of the interaction landscape of a few mH2A1.1-regulated genes revealed  
251 reproducible changes in the intensity of interactions at certain enhancers in mH2A1.1 KD vs  
252 wt cells (**Fig 6F, 6G and S14B-C**). For example, we observed an increase in the intensity of some  
253 interactions at the RG *FRAS1* upon mH2A1.1 depletion (**Fig 6F**), and a decrease in the intensity  
254 of interactions at the AG *ARDDC3* (**Fig 6G**). But this cannot be generalized, having also  
255 observed a decrease in the intensity of some interactions at RGs and an increase in the  
256 intensity of interactions at AGs (*data not shown*). Thus, the gain or loss of interactions does  
257 not appear to be related to transcriptional changes mediated by the loss of mH2A1.1. In  
258 addition, ChIP-qPCR of Pol II at the TSS of these AGs showed an increase in Pol II association  
259 at TSS upon loss of mH2A1.1 (**Fig 6H and S10B**). This observation is similar to that one  
260 observed for AGs (**Fig 4E**) whose 3D organization is not affected by mH2A1.1 depletion (**S14D**  
261 **Fig**). So, we conclude that chromatin looping does not interfere with the potential role of  
262 mH2A1.1 in Pol II release.

263  
264  
265 **mH2A1.1 inhibits cell migration by activating the expression of paused genes regulating**  
266 **cytoskeleton organization** mH2A1.1-target genes are involved in four main processes: cell  
267 cycle (9% of mH2A1.1-target genes), DNA repair (4%), cytoskeleton organization and cell  
268 adhesion (19%) (**S15A-B Fig and S4 Table**). The two first processes were expected based on  
269 earlier studies (Kim et al., 2018; Novikov et al., 2011; Judith C Sporn & Jung, 2012; Xu et al.,  
270 2012). However, the transcriptional role of mH2A1.1 on cytoskeleton organization and cell  
271 adhesion genes is poorly documented except the recent research of Marcus Buschbeck and  
272 colleagues showing that mH2A1.1 regulates those categories of genes in murine C2C12 cells  
273 (Hurtado-Bagès et al., 2020). Upon transfection of two different siRNA against mH2A1.1,  
274 MDA-MB231 cells became more elongated after 2-3 days (**Fig 7A and S16A**). Using  
275 immunofluorescence against cytoskeleton proteins (actin, tubulin- $\alpha$ , vimentin), we observed  
276 that the cytoskeleton organization was modified by the loss of mH2A1.1 (**Fig 7A**). Moreover,  
277 numerous mH2A1.1-regulated genes are involved in cell migration, such as *ARRDC3*, *SOCS4*,  
278 *HACE1* and *FBXL4* which are mH2A1.1-activated genes described as anti-migratory genes  
279 (Castillo-Lluva et al., 2013; Draheim et al., 2010; Mei et al., 2015; Stankiewicz et al., 2017) or  
280 *MMP14*, *EIF6*, *MT1E*, *JUND* and *DAPK3* which are mH2A1.1-repressed genes with pro-

281 migratory properties (Cathcart et al., 2015; Kake et al., 2017; Pinzaglia et al., 2015; Ryu et al.,  
282 2012; Selvaraj et al., 2015). In agreement, upon depletion of mH2A1.1, the migratory capacity  
283 of MDA-MB231 cells was significantly increased compared to control cells (**Fig 7A-B**). The  
284 effect of knocking down the other isoform, mH2A1.2, was opposite to that of mH2A1.1 (**S16**  
285 **Fig**).

286  
287 Strikingly, mH2A1.1-AGs involved in cytoskeleton organization and cell adhesion were  
288 also amongst genes with a high Pol II pausing index (**Fig 7C, D**), compared to cell cycle and  
289 DNA repair mH2A1.1-AGs (**S15C Fig**). Overall, we conclude that mH2A1.1 impedes the  
290 migration capacity of MDA-MB231 breast cancer cells in part by promoting expression of  
291 genes modulating cell migration capacity.

## 292 293 **Discussion**

294 Regulating gene expression in a particular cell type requires fine-tuning transcriptional  
295 response. The concentration and the relative ratio between factors required for these  
296 regulatory mechanisms ensure rapid adjustments to maintain homeostasis or to respond to  
297 stimuli and stress. In this study, we identify the histone variant mH2A1.1 as a means to operate  
298 these adjustments in TNBC cells.

299  
300 We present the first genome-wide map of endogenous histone variant mH2A1.1 in  
301 human breast cancer cells. We discovered that the mH2A1.1 variant specifically associates  
302 with transcription regulatory elements, promoters and enhancers, in addition to large  
303 domains of facultative heterochromatin. Binding to promoters occurred in sharp, narrow  
304 peaks as opposed to the larger signals detected in heterochromatin seen previously (**Fig 2B**  
305 **and S4**)(H. Chen et al., 2014; Douet et al., 2017; Gamble et al., 2010; M. D. Lavigne et al.,  
306 2015). Moreover, we found that selective depletion of the mH2A1.1 isoform was sufficient to  
307 modify expression of hundreds of actively transcribed genes in the MDA-MB231 TNBC cell line  
308 (**Fig 1A-C**). All of these genes are highly expressed in this cell line. We uncovered two distinct  
309 mechanisms through which mH2A1.1 regulates their transcription and link them to the  
310 chromatin landscape in which the affected genes reside.

311  
312 The first mechanism consists in dampening transcription of highly expressed genes.  
313 Indeed, in the absence of mH2A1.1, these mH2A1.1-RGs are overexpressed. mH2A1.1 binds  
314 the gene bodies alongside RNA pol II, as well as their associated promoters (**Fig 3 and S12B**).  
315 Importantly, these domains are also characterized by the presence of RING1B and the  
316 Polycomb-induced histone modification, H2AK119ub (Chan et al., 2018) on their enhancers  
317 and promoters (**Fig S7, S12, S13**). It is now recognized that the presence of Polycomb subunits  
318 does not always correlate with transcriptional repression states with the identification of  
319 specific PRC1 variants at a large number of active loci (Giner-Laguada & Vidal, 2020) especially



320 in cancer cells (Chan et al., 2018; Y. Zhang et al., 2020). Moreover, RING1B -target genes in  
321 MDA-MB231 cells are transcriptionally actives and highly expressed (Chan et al., 2018) as we  
322 found for mH2A1.1-targets genes (**Fig 1B,C**). We can postulate that the presence of mH2A1.1  
323 may favor binding of the PRC1 complexes to moderate expression of mH2A1.1-RGs. Indeed  
324 expression levels at mH2A1.1-RGs are only slightly increased in mH2A1.1-depleted MDA-  
325 MB231 cells, similarly to observations in human lymphoma cell line (M. D. Lavigne et al., 2015),  
326 suggesting that mH2A1.1 may limit transcriptional noise and serve as a brake (**Fig 7E**).

327  
328 The second mechanism is specific to genes in which RNA pol II is paused. Here, in  
329 contrast to the RGs, mH2A1.1 recruitment is restricted to the TSS of these genes. The deletion  
330 of mH2A1.1 leads to a reduction of the transcriptional level of these genes (mH2A1.1-AGs) as  
331 well as an accumulation of Pol II at their TSS (**Fig 1A-C, Fig 4E, Fig 6H**). It is indeed tempting to  
332 combine these two observations to propose that mH2A1.1 may assist in the conversion of  
333 promoter-locked RNA polymerase II into a productive and elongated Pol II. The presence of  
334 BRD4 at the TSS of mH2A1.1-AGs likely favors transcription elongation by playing a role in  
335 allosteric activation of P-TEFb (Winter et al., 2017). Then, we can imagine that mH2A1.1 could  
336 help to the recruitment of P-TEFb at promoter proximal region and thus contributes to the Pol  
337 II pause-release. Accumulation of Pol II at TSS could also be due to accumulation of torsional  
338 stress, through topoisomerase inhibition (Teves & Henikoff, 2014). BRD4 is known to  
339 overcome the torsional constraint to transcription by stimulating TOP1 activation concomitant  
340 with pause release events (Baranello et al., 2016). Deletion of mH2A1.1 could impair this  
341 process, resulting in the maintenance of torsional stress, accumulation of Pol II and inhibition  
342 of transcription. Finally, the chromatin organization at mH2A1.1-AGs, which are mostly  
343 characterized by Pol II pausing, seems more dynamic than at mH2A1.1-RGs, with more  
344 frequent but weaker contacts detected by PCHiC (**Fig 6**). In these domains, as Pol II is retained  
345 in pause at the TSS, its release could be facilitated by transient TSS-enhancer contacts in  
346 search for co-occupancy of coactivators and Pol II (**Fig 7E**). This observation can be generalized  
347 to all paused genes in the MDA-MB231 cell line (*data not shown*) identifying a new  
348 characteristic of paused genes with respect to their 3D organization of the genome.  
349 Conversely, the 3D organization of the mH2A1.1-RG loci appears to be relatively stable,  
350 reminiscent of a productive and well-organized environment for transcription (**Fig 6, Fig 7E**).

351  
352 Currently, only one study has analyzed transcriptional activities of mH2A1.1 related to  
353 its genomic localization, and that is in murine muscle cell line C2C12 (Hurtado-Bagès et al.,  
354 2020). As in our study, although mH2A1.1 is mainly implicated in repression of transcription,  
355 a significant proportion of genes requires mH2A1.1 for their level of transcription. Among the  
356 activated genes, mH2A1.1 is enriched on genes encoding proteins related to adhesion,  
357 migration and the organization of extracellular matrix. But at the difference of our study, this  
358 recruitment occurs upstream of the TSS of these genes, the level of mH2A1.1 occupancy on  
359 the bodies of genes reduces with increasing transcriptional activity. However, Lavigne et al,  
360 identified a restricted recruitment of the mH2A1.2 isoform to TSS of mH2A1-regulated genes

361 in two cancer cell types, HeLa and Namalwa cells (M. D. Lavigne et al., 2015) even if a  
362 comparison of genomic sites bound by mH2A1.2 nucleosomes revealed only a small overlap  
363 between HeLa and Namalwa cells. Similarly, restricted recruitments at TSS were also observed  
364 for mH2A1 and mH2A2 in human et mouse embryonic stem cells (Pliatska et al., 2018; Yildirim  
365 et al., 2014). Therefore, we believe that the mH2A variants are differentially recruited to  
366 regulatory sites depending on carcinogenic and differentiation state of the cells. In breast  
367 cancers, recruitment and thus the roles of mH2A1 variants must be subtype specific. The  
368 newly identified recruitment of mH2A1.1 would thus be TNBC specific, as not identified so far  
369 in luminal breast cancer cell lines (Gamble et al., 2010). It could then explain why we found a  
370 correlation between mH2A1.1 expression levels and survival rates only in TNBC patients (A.-  
371 C. Lavigne et al., 2014).

372  
373 Interestingly, it is mainly genes involved in cell migration that are concomitantly  
374 regulated by the stimulatory activity of mH2A1.1 and Pol II released events (**Fig 7C-D**). Among  
375 mH2A1.1 AGs were anti-migratory genes such as ARRDC3 (Draheim et al., 2010), SOCS4 (Mei  
376 et al., 2015), HACE1 (Castillo-Lluva et al., 2013) and FBXL4 (Stankiewicz et al., 2017). A role for  
377 mH2A1.1 in the control of cell migratory capacities has already been identified in gastric  
378 cancer cells (F. Li et al., 2016), MDA-MB231 cells (Dardenne et al., 2012), and mouse cell lines  
379 (Dardenne et al., 2012; Posavec Marjanović et al., 2017). Here, in addition to that silencing of  
380 mH2A1.1 enhances cell migration in the MDA-MB231 cell line (**Fig 7A-B**), we begin to identify  
381 the underlying molecular mechanism with direct transcriptional stimulation by mH2A1.1 of  
382 genes highly dependent on the Pol II pausing (**Fig 7C-D**).

383  
384 We further demonstrate that mH2A1.1-bound chromatin co-localizes with the  
385 H3K9me3 histone mark (**Fig S4A**). A fraction of these sites is devoid of H3K27me3 and could  
386 correspond to the identified mH2A localization at constitutive heterochromatin (Douet et al.,  
387 2017). However, the vast majority of mH2A1.1-bound H3K9me3-decorated chromatin  
388 contained also tri-methylated H3K27 (**Fig S4**). This difference may be a feature of the MDA-  
389 MB231 cell line, a high migratory capacity cancer cell line in which H3K9me3 histone marks  
390 are distributed unusually (Segal et al., 2018; Yokoyama et al., 2013). Overall, heterochromatin-  
391 related processes in this cancerous cell appear modified compared to non-cancerous cells and  
392 could potentially result from or favor malignant cellular transformation (Segal et al., 2018;  
393 Yokoyama et al., 2013). Thus, it could be interesting to further investigate additional molecular  
394 mechanisms, enzymes and epigenetic machineries altered in this cancer type.

395  
396 Despite the association of mH2A1.1 with heterochromatin, its phenotypic knockdown  
397 was not sufficient to reactivate silenced genes present in these domains (**Fig 1B, 1C and S4**).  
398 Different hypothesis could explain this result. The first hypothesis could be that mH2A1  
399 isoforms (mH2A1.1 and mH2A1.2) have redundant actions at heterochromatin. Here, we  
400 specifically depleted mH2A1.1 without affecting the expression of mH2A1.2 (**Fig S1D**). The  
401 presence of mH2A1.2 could be sufficient to maintain gene silencing, although mH2A1.2-

402 occupied silent genes were also not reactivated upon mH2A1.2 knock-down (Dell'Orso et al.,  
403 2016). However, even if mH2A1 binding was shown to overlap with H3K27me3-decorated  
404 chromatin in primary human cells, no enrichment of H3K27me3 at mH2A1-regulated genes  
405 (both isoforms) was observed (H. Chen et al., 2014). The second hypothesis could be that  
406 mH2A1.1, as well as mH2A1.2, may serve as a lock to conserve heterochromatin  
407 stability/organization but are not required for gene silencing. In agreement with this  
408 hypothesis, two studies demonstrated that mH2A are implicated in the condensation of  
409 heterochromatin regions such as Lamin-Associated-Domains and repeated DNA elements  
410 without drastically affecting their expression level (Douet et al., 2017; Fu et al., 2015). Further  
411 analyses are needed to better characterize the role of mH2A at heterochromatin regions.

412

413 In this study, we demonstrate that a key function of mH2A1.1 is to orchestrate the  
414 proper transcriptional output of genes depending on their environment. Yet, mH2A1.1 did not  
415 seem necessary for chromatin topologies. We cannot exclude that mH2A1.1 participates in  
416 short-range or transient structural changes that our approach is not sensitive enough to  
417 identify. However, others have reported that key transcription factors or cofactors do not alter  
418 3D folding and, in particular, enhancer-promoter looping (Schoenfelder & Fraser, 2019). For  
419 example, in MDA-MB231 cells, the Fra1 activator binds to promoters and enhancers, but does  
420 not mediate looping (Bejjani et al., 2021). In SEM leukemia cell lines, BRD4 inhibition has only  
421 minor effects on enhancer-promoter interactions (Crump et al., 2021) despite a strong effect  
422 on key-oncogenic target gene expression. Thus, stabilization of enhancer-promoter loops is  
423 not always a prerequisite for transcriptional fine-tuning by transcriptional regulators. We  
424 could speculate that their roles are more functional by facilitating interactions between  
425 enhancer-associated factors as it was observed for BRD4 through the formation of phase-  
426 separated condensates (Sabari et al., 2018). It would be interesting to test whether mH2A1.1  
427 participates to this process especially since we have identified a preferential association of  
428 mH2A1.1 with SEs (**Fig 5D-E**). SEs are known to play an important part in many diseases,  
429 including several cancers in which they drive expression of oncogenes (Donati et al., 2018;  
430 Lovén et al., 2013) and the expression of mH2A1.1 is altered in cancer cells compared to  
431 normal tissues (Cantariño et al., 2013; A.-C. Lavigne et al., 2014; Judith C Sporn & Jung, 2012).  
432 SE function may be compromised by variations in mH2A1.1 level leading to inability to fine-  
433 tune transcriptional output, in particular via the first mechanism described above (**Fig 7E**)  
434 needed to avoid excessive transcription of oncogenes.

## 435 **Figure legends**

436

437 **Fig 1. The histone variant mH2A1.1 regulates the expression of hundreds of genes in MDA-**  
438 **MB 231 cells.** (A) Volcano plot showing fold change of gene expression in mH2A1.1 KD  
439 compared to WT MDA-MB231 cells. Red dots represent significantly deregulated genes with  
440 a fold change > 1.5 and p-adj < 0.1. (B) Boxplot comparing gene expression (FPKM) of indicated

441 genes between control (WT) and mH2A1.1 KD conditions. \*\*\*\* = p-value <  $2.2 \times 10^{-16}$ ; ns = non-  
442 significant. (C) Pie charts showing proportion of mH2A1.1 regulated-genes in 4 groups  
443 categorized by gene expression levels in control cells, as indicated. Enrichment of mH2A1.1-  
444 target genes with categories of genes are measured using fisher exact tests. p-values (p) and  
445 the Odd ratios are shown. (D) Whole genome spearman correlation heatmap of mH2A1.1,  
446 mH2A1 and a series of histone modifications and chromatin associated factor ChIP-seq data,  
447 as indicated. Pearson coefficient correlations (PCC, r) are given. Red and blue colours denote  
448 high correlation (r close to 1) and anti-correlation (r close to -1), respectively. (E) Proportions  
449 of different genomic features associated with mH2A1.1 conserved peaks. mH2A1.1  
450 “conserved” peaks correspond to the common peaks between mH2A1.1 specific ChIP-seq and  
451 mH2A1 ChIP-seq and are used for further analysis.

452  
453 **Fig 2. mH2A1.1 is recruited to promoters of active genes.** (A) TSS (+/- 1kb) centered spearman  
454 correlation heatmap of ChIP-seq data. Correlations shown as in Fig1D. (B) Profiles of relative  
455 enrichment around the TSS (+/- 10 kb) of indicated ChIP-seq at human annotated genes (n=  
456 25,723) ranked according to the mH2A1.1 level at TSS (+/- 500bp). Colour intensity reflects  
457 level of ChIP-seq enrichment. Heatmaps are oriented with gene bodies placed on the right of  
458 the heatmap. (C) Metagene profiles of the average (+/- standard error) of mH2A1.1  
459 enrichment at TSSs (+/- 2 kb) categorized in 4 groups according to gene expression levels  
460 measured using RNA-seq data. (D) Genome browser views of indicated ChIP-seq illustrating  
461 the binding of mH2A1.1 to the promoter region of a transcribed gene in an open chromatin  
462 state (top) and its absence on a silent gene in a closed chromatin state (bottom). Unstranded  
463 RNA-seq signal is also shown. Black arrows indicate direction of transcription. (E) Metagene  
464 profile of average (+/- standard error) of mH2A1.1, Pol II and H3K27ac enrichment at TSS (+/-  
465 2kb) of transcribed genes (see Fig 2C, groups 2 to 4).

466  
467 **Fig 3. The chromatin landscapes of mH2A1.1-regulated genes.** (A) Top panel: Heatmap  
468 profiles showing relative enrichment of indicated proteins and histone modifications around  
469 the TSS (+/- 10 kb) of mH2A1.1-regulated genes (see Fig 1A). On the top, mH2A1.1-repressed  
470 genes (1 to 412, n=412), on the bottom, mH2A1.1-activated genes (412 to 945, n=533). Color  
471 intensity reflects level of ChIP-seq enrichment. Heatmaps are oriented. Bottom panel:  
472 Metagene profiles of average (+/- standard error) of indicated ChIP-seq data around the TSS  
473 (+/- 10 kb) of mH2A1.1-regulated genes. Average profiles around the TSS of mH2A1.1-  
474 repressed genes are shown in green whereas average profiles around the TSS of mH2A1.1-  
475 activated genes are shown in red. Results of statistical difference analysis between these two  
476 groups are shown, either on the TSS (+/- 50 bp) or on the gene body (+50 bp – TES). Complete  
477 statistical analysis is shown in S6 fig. ns, not significant. \*\* = p-value < 0.01, \*\*\* = p-value <  
478 0.001, \*\*\*\* = p-value <  $2.2 \times 10^{-16}$ . (B) Metagene profiles of average (+/- standard error) of  
479 mH2A1.1 and Pol II enrichment at mH2A1.1-regulated genes. (C) Genome browser views of  
480 ChIP-seq on a mH2A1.1-repressed gene (top) and a mH2A1.1-activated gene (bottom).

481 Unstranded RNA-seq signals in control and mH2A1.1 KD are also shown. Black arrows indicate  
482 direction of transcription.

483

484 **Fig 4. mH2A1.1-activated genes are regulated by Pol II pausing.** (A) Top panel: Heatmap  
485 profiles showing enrichment of indicated factors and modifications around the TSS (+/- 10 kb)  
486 of transcribed genes (n=10,198) ranked by their pausing index. Colour intensity reflects level  
487 of CHIP-seq enrichment. Heatmaps are oriented. Bottom panel: Metagene profiles of average  
488 (+/- standard error) of indicated CHIP-seq data around the TSS (+/- 10 kb) of paused and not  
489 paused genes, as indicated in pink and black, respectively. Genes are considered as paused if  
490 their pausing index (PI) is > 2 (n=7,208). Genes are considered as a “not paused” if PI < 2  
491 (n=3,356). Results of statistical difference analysis between these two groups are shown,  
492 either on the TSS (+/- 50 bp) or on the gene body (+50 bp – TES). Complete statistical analysis  
493 is shown in S8A. \*\*\*\* = p-value < 2.2x10<sup>-16</sup>. (B) Fisher test heatmap showing enrichment of  
494 indicated mH2A1.1-target genes with genes divided in 5 equal size categories as a function of  
495 their pausing index. Stars indicate the significantly of the fisher exact tests; color map and  
496 values present in each scare highlight the log2 odd ratio (LOR) of the fisher exact test. N  
497 indicates the number of genes used for the analysis. (C) Boxplot comparing the pausing index  
498 of five indicated groups of genes. (Gene number in each group: 1, n=433, 2, n= 310, 3, n=  
499 9.645, 4, n=5.176, 5, n=4.469). \*\*\*\* = p-value < 2.2x10<sup>-16</sup>. ns, not significant. Only genes  
500 characterized by a PI were used to generate this boxplot. (D) Genome browser view of  
501 indicated CHIP-seq on a paused gene. Unstranded RNA-seq signals in control and mH2A1.1 KD  
502 conditions are shown. Black arrows indicate direction of transcription. (E) Left panel: genome  
503 browser view of CHIP-seq of three mH2A1.1-activated genes (*RBL1*, *GTF2H3*, *E2F3*). Those  
504 genes are considered as paused genes with PI of 3,28, 2,9 and 3,2, respectively. Right panel:  
505 CHIP-qPCR of Pol II on WT and mH2A1.1-depleted cells. Hetero corresponds to a negative  
506 position. For each gene, Pol II enrichment was evaluated on the TSS and a gene body region.  
507 Results from additional biological replicates are given S10A.

508

509 **Fig 5. mH2A1.1 associates with enhancers and super-enhancers** (A) Genome browser view of  
510 indicated CHIP-seq illustrating occupancy of mH2A1.1 with “putative” enhancers. “Putative”  
511 enhancers are based on H3K27ac signal outside promoter regions using the ROSE package  
512 (Blinka et al., 2017). The black box shows a “zoom” on one enhancer. The orange arrows  
513 highlight the maximum signal of CHIP-seq data on this enhancer. (B) Overlap of “putative”  
514 enhancers with mH2A1.1 peaks. Enrichment of mH2A1.1-peaks with enhancers are measured  
515 using fisher exact tests. (C) Heatmap profiles showing indicated CHIP-seq data relative  
516 enrichment around the enhancers (+/- 1 kb). Colour intensity reflects the level of CHIP-seq  
517 enrichment. Each line represents an enhancer (from 1 to 23,371 enhancers). Enhancers are  
518 ranked according to the level of mH2A1.1 on enhancers, as indicated. (D) Genome browser  
519 view of indicated CHIP-seq illustrating occupancy of mH2A1.1 at “putative” super-enhancers  
520 (SEs). (E) Overlap of SEs with mH2A1.1 peaks. Enrichment of mH2A1.1-peaks with SEs are  
521 measured using fisher exact tests.



522

523 **Fig 6. mH2A1.1 regulates gene expression within predefined 3D chromatin domains.** (A)  
524 Boxplot showing the average number of PChIC significant interactions per gene with adjacent  
525 genomic regions between genes not affected by mH2A1.1, mH2A1.1-repressed genes (n=181)  
526 and mH2A1.1-activated genes (n=282) in control and mH2A1.1 KD conditions. PChIC  
527 significant interactions were determined using ChiCMaxima (Ben Zouari et al., 2019). Paired  
528 Wilcoxon test were used to compare control and mH2A1.1 KD conditions. ns, not significant.  
529 \*\*\*\* = p-value <  $2.2 \times 10^{-16}$ . (B) Boxplot showing the mean of intensity of PChIC interactions per  
530 gene between genes not affected by mH2A1.1, mH2A1.1-repressed genes (n=181) and  
531 mH2A1.1-activated genes (n=282) in control and mH2A1.1 KD conditions. (C) Snapshot of  
532 PChIC data set on the mH2A1.1-repressed *ALO3* gene in control and mH2A1.1 KD conditions.  
533 Interaction intensity between the target gene and the associated genomic region are plotted  
534 over a 2 Mb gene domain around the promoter bait. Control (blue line) and mH2A1.1 KD (red  
535 line) are shown. The vertical bars correspond to PChIC significant interactions conserved  
536 between two biological replicates in each condition. (D) Same as in (C) but for the mH2A1.1-  
537 activated *PDHX* gene. (E) Pie chart showing the percentage of mH2A1.1-target genes (RG on  
538 the top, AG on the bottom) having 1, 2, 3 or more than 3 PChIC significant interactions. (F)  
539 Same as in (C) but this mH2A1.1-repressed gene, *FRAS1*, shows a reproducible gain of  
540 interaction with a specific genomic region (red arrow). (G) Same as in (D) but this mH2A1.1-  
541 activated gene, *ARRDC3*, shows a reproducible reduction of interaction with specific genomic  
542 regions (red arrow). (H) ChIP-qPCR of Pol II on WT and mH2A1.1-depleted cells. Hetero  
543 corresponds to a negative position. For each gene, Pol II enrichment was evaluated only on  
544 the TSS. Results from additional biological replicates are given S10B. On snapshots of PChIC  
545 data, only results from replicate n°1 are shown here; second replicate n°2 in S14A-B.

546

547 **Fig 7. mH2A1.1 inhibits cell migration by favouring expression of paused genes involved in**  
548 **cytoskeleton and cell adhesion in MDA-MB231 cells.** (A) Top: representative DIC microscopy  
549 images of WT and mH2A1.1 KD MDA-MB231 cells. Scale bar = 100  $\mu$ M. Center:  
550 Immunofluorescence labelling of Actin, Tubulin- $\alpha$  and Vimentin. Nuclei are stained with  
551 Hoechst. Scale bar = 20  $\mu$ M. Bottom: representative images of cells during Boyden chamber  
552 migration assay. Only migrated cells are labelled in purple. Scale bar = 150  $\mu$ M. (B)  
553 Quantification of Boyden chamber assay presented in (A). Error bar represents s.d from n=3  
554 independent experiments as illustrated in (A). "\*" = p-value (p) < 0.05. (C) Overlap of paused  
555 genes (n=7,208) with mH2A1.1-regulated genes related to cytoskeleton and cell adhesion.  
556 Enrichment of this subgroup of mH2A1.1-regulated genes with paused genes are measured  
557 with fisher exact tests. (D) Fisher test heatmap showing enrichment of indicated mH2A1.1-  
558 target genes with genes divided in 5 equal size categories as a function of their pausing index.  
559 Stars indicate the significance of the fisher exact tests; color map and values present in each  
560 square highlight the log2 odd ratio (LOR) of the fisher exact test. N indicates the number of  
561 genes used for the analysis. (E) Working model describing the genomic organization of  
562 mH2A1.1-target genes. Left: mH2A1.1-repressed genes display a small number of stable

563 interactions with enhancers or adjacent genomic regions characterized by bivalent chromatin  
564 marks. Pol II is enriched at the TSS and the gene body in this group of genes with a high Pol II  
565 elongation rate. The presence of mH2A1.1 all along the gene and associated enhancers slows  
566 Pol II elongation, maybe by favouring recruitment of repressors. Right: mH2A1.1-activated  
567 genes display a large number of transient interactions. Some of them are established with  
568 enhancers bound by BRD4 and possess a specific chromatin landscape. Pol II is mainly in pause  
569 in this group of genes, with a reduced Pol II elongation rate. Transient interactions between  
570 enhancers and promoters may promote Pol II pausing release, favoured by mH2A1.1.

571  
572 **S1 Fig. RNAi knock down of specific mH2A1 isoforms in MDA-MB231 cells.** (A) RTqPCR on  
573 MDA-MB231 and MCF7 cells showing expression levels of mH2A1 isoforms. (B) Western blot  
574 on whole cell extracts of MDA-MB231 and MCF7 cells showing improved affinity of Ab  
575  $\alpha$ mH2A1.1 to recognize mH2A1.1 compared to Ab#37264 (Ab  $\alpha$ mH2A1). Ab#61427 is specific  
576 to mH2A1.2. GAPDH is used as a loading control. (C) RTqPCR quantifying KD of mH2A1  
577 isoforms. (D) Western blot showing specific depletion of mH2A1 isoforms protein. H3 is used  
578 as a loading control. (E) Immunofluorescence showing specific partial depletion of mH2A1  
579 isoforms. DNA is labelled with Hoechst. Scale bar = 10  $\mu$ m. (F) As in (C) but with a second siRNA  
580 against mH2A1.1 (siRNA #2). (G) As in (D) but with a second siRNA against mH2A1.1 (siRNA  
581 #2). GAPDH is used as a loading control. (H) RTqPCR analysis of a subset of RNAseq-defined  
582 mH2A1.1 regulated-genes. Genes are divided in three groups, as indicated. (C-H) Analysis  
583 were done three days post-transfection of specific siRNAs. RTqPCR, mRNA expressions are  
584 normalized by *RPLP0* mRNA. Error bars represent s.d from independent experiments (n>=2).  
585 “\*” : p < 0.05, “\*\*\*” : p < 0.001, ns, not significant. Quantifications are shown, normalized to  
586 protein loading control.

587  
588 **S2 Fig. The antibody Ab  $\alpha$ mH2A1.1 recognizes specifically the isoform mH2A1.1.** (A) Western  
589 blot showing specific recognition of mH2A1.1 isoform by Ab  $\alpha$ mH2A1.1 antibody. HEK-293T  
590 cells were transfected with plasmids coding for Flag-mH2A1.1 (Flag1.1) or Flag-mH2A1.2  
591 (Flag1.2) fusion overexpressed-proteins. Western blot was then done with Ab  $\alpha$ mH2A1.1,  
592 Ab#Flag and Ab#E215 (that preferentially recognizes mH2A1.2) antibodies on whole cell  
593 extracts. GAPDH is used as a loading control. (B) Immunofluorescence in HEK-293T cells  
594 showing specific recognition of mH2A1.1 isoform by Ab  $\alpha$ mH2A1.1. (C) Western blot on ChIP  
595 extracts from HEK-293T cells overexpressing Flag1.1 or Flag1.2 showing that Ab  $\alpha$ mH2A1.1  
596 immunoprecipitates only mH2A1.1 isoform. Different extracts were loaded: Input fraction  
597 (Input), Non immunoprecipitated fraction (NoIP) and immunoprecipitated fraction (IP).  
598 Percentages represent fraction loaded on western blot compared to quantity used for ChIP.  
599 (D) Western blot showing that Ab  $\alpha$ mH2A1.1 is also working in ChIP in MDA-MB231 cells on  
600 the endogenous protein. (E) As in (A), but for Ab  $\alpha$ mH2A1 (Ab#37264) antibody showing that  
601 this antibody recognizes both isoforms but it less affine for Flag1.1 than Ab  $\alpha$ mH2A1.1. (F) As  
602 in (B), but for Ab  $\alpha$ mH2A1 (Ab#37264) antibody showing that this antibody recognizes both  
603 isoforms but it less affine for Flag1.1 than Ab  $\alpha$ mH2A1.1. (G) As in (C) but for Ab  $\alpha$ mH2A1

604 (Ab#37264) antibody showing that this antibody recognizes both isoforms but it less affine for  
605 Flag1.1 than Ab  $\alpha$ mH2A1.1.

606

607 **S3 Fig. Validation of mH2A1 isoforms ChIP-seq by ChIP-qPCR on specific genomic loci.** (A)  
608 mH2A1.1 binding at indicated genomic regions selected based on ChIP-sequencing. The black  
609 arrows show the direction of transcription. Genomic coordinates are also given. Localisation  
610 of primers used for ChIP-qPCR are shown in red. (B) Occupancy of mH2A1 isoforms (left part:  
611 Ab  $\alpha$ mH2A1.1; right part: Ab  $\alpha$ mH2A1) analysed by ChIP-qPCR in control cells (WT) and cells  
612 partially deficient for mH2A1.1 using two different siRNA (mH2A1.1 KD #1 and mH2A1.1 KD  
613 #2). Error bars represent +s.d from independent experiments (n>=2).

614

615 **S4 Fig. mH2A1.1 binds facultative heterochromatin domains.** (A) Overlap of heterochromatin  
616 histone marks (H3K27me3 and H3K9me3) with mH2A1.1 peaks. Genome-wide enrichments  
617 of mH2A1.1 peaks with heterochromatin histone marks are measured with fisher exact tests.  
618 Enrichment of mH2A1.1 with PARP1 peaks was done on heterochromatin domains. (B)  
619 Genome browser view illustrating occupancy of mH2A1.1 with heterochromatin histone  
620 marks (H3K27me3 and H3K9me3). Top: region with high level of H3K27me3. Bottom: region  
621 with high level of H3K9me3. Unstranded RNA-seq signal is also shown. The black arrows show  
622 the direction of transcription. Genomic coordinates are given. (C) Boxplots showing  
623 H3K27me3 and H3K9me3 enrichment levels on H3K27me3-H3K9me3 common peaks.  
624 Common peaks were divided into 5 equal size categories according to the level of H3K27me3,  
625 as indicated. Statistical analyses to compare differences are given. “\*\*\*\*” = p-value <  $2.2 \times 10^{-16}$ .  
626 (D) Histogram showing proportions of heterochromatin (H3K27me3-H3K9me3 common  
627 peaks) on genomic regions (green) or intergenomic regions (black). Heterochromatin peaks  
628 were divided into 5 equal size categories according to difference between H3K27me3 and  
629 H3K9me3 signal, as mentioned (F) Fisher test heatmap showing enrichment of indicated ChIP-  
630 seq peaks (overlapping with common heterochromatin peaks) with heterochromatin peaks  
631 divided in 5 equal size categories as a function of differences between H3K27me3 and  
632 H3K9me3 signals. Stars indicate the significantly of the fisher exact tests; color map and  
633 values present in each scare highlight the log2 odd ratio (LOR) of the fisher exact test. (G) As  
634 for in (E) but this time mH2A1.1 peaks overlapping with heterochromatin domains are divided  
635 in 5 equal size categories as a function of mH2A1.1 signal.

636

637 **S5 Fig. The mH2A1.1 isoform binds active promoters.** (A) Overlaps of mH2A1.1 peaks with  
638 H3K4me3 and Pol II peaks at TSS (left) or H3K9me3 and H3K27me3 peaks (right). Enrichments  
639 of mH2A1.1 peaks with the ChIP-seq data at TSS are measured with fisher exact tests. (B)  
640 Heatmap profiles showing indicated ChIP-seq relative enrichment around the TSS (+/- 10 kb)  
641 at human annotated genes (n= 25,723) according to the level of mH2A1.1 at TSS (+/- 500 bp).  
642 Colour intensity reflects level of ChIP-seq enrichment. Heatmaps are oriented. (C) Boxplots  
643 comparing the levels of mH2A1.1 at TSS (+/- 500bp) of 4 groups of genes categorized by their  
644 gene expression levels, as indicated. “\*\*\*\*” = p-value <  $2.2 \times 10^{-16}$ . (D) Metagene plot of average

645 (+/- standard error) of mH2A1 isoforms enrichment from TSS to TES (+/- 2 kb) categorized by  
646 gene expression levels, as indicated. (E) Fisher exact test heatmap showing the enrichment of  
647 mH2A1.1 at TSS (TSS +/- 500 bp) on 4 groups of promoters categorized according to the level  
648 of gene expression. Legend as for Fig S4F. (F) as in (C) but for Pol II.

649  
650 **S6 Fig. The mH2A1.1 isoform regulates expression of active genes in different chromatin**  
651 **environments.** Boxplots showing the relative enrichment of indicated ChIP-seq between the  
652 mH2A1.1-repressed genes and mH2A1.1-activated genes. Left: enrichment on TSS (+/- 50 bp);  
653 Right: relative enrichment of gene body (+50 bp to the TES). ns, not significant. “\*\*\*\*” = p-value  
654  $< 2.2 \times 10^{-16}$ .

655  
656 **S7 Fig. Chromatin environments of mH2A1.1-regulated genes.** (A) Top panel: Heatmap  
657 profiles showing relative enrichment of indicated proteins and histone modifications around  
658 the TSS (+/- 10 kb) of mH2A1.1-regulated genes (see Fig 1A). On the top, mH2A1.1-repressed  
659 genes (1 to 412, n=412), on the bottom, mH2A1.1-activated genes (412 to 945, n=533). Color  
660 intensity reflects level of ChIP-seq enrichment. Heatmaps are oriented. Bottom panel:  
661 Metagene profiles of average (+/- standard error) of indicated ChIP-seq data around the TSS  
662 (+/- 10 kb) of mH2A1.1-regulated genes. Average profiles around the TSS of mH2A1.1-  
663 repressed genes are shown in green whereas average profiles around the TSS of mH2A1.1-  
664 activated genes are shown in red. (B) Boxplots showing the relative enrichment of indicated  
665 ChIP-seq between the mH2A1.1-repressed genes and mH2A1.1-activated genes. Left:  
666 enrichment on TSS (+/- 50 bp); Right: relative enrichment of gene body (+50 bp to the TES).  
667 ns, not significant. “\*\*\*\*” = p-value  $< 2.2 \times 10^{-16}$ .

668  
669 **S8 Fig. Chromatin environments of paused genes.** (A) Boxplots showing the relative  
670 enrichment of indicated ChIP-seq between paused and not paused genes. Genes are  
671 considered as paused if their pausing index (PI) is  $> 2$  (n=7,208). Genes are considered as a  
672 “not paused” if  $PI < 2$  (n=3,356). Left: boxplot showing the relative enrichment of ChIP-seq  
673 around TSS (+/- 50 bp). Right: boxplot showing the relative enrichment of ChIP-seq on the  
674 gene body (from + 50bp to TES). ns, not significant. “\*\*\*\*” = p-value  $< 2.2 \times 10^{-16}$ . (B) Boxplot  
675 comparing the pausing index of 5 categories of Pol II-bound genes divided according to the  
676 width of Pol II peaks. ns, not significant. “\*\*\*\*” = p-value  $< 2.2 \times 10^{-16}$ . (C) Same as in (B) but for  
677 mH2A1.1-bound genes.

678  
679 **S9 Fig. Chromatin environments of paused genes.** (A) Top panel: Heatmap profiles showing  
680 enrichment of indicated factors and modifications around the TSS (+/- 10 kb) of transcribed  
681 genes (n=10,198) ranked by their pausing index. Colour intensity reflects level of ChIP-seq  
682 enrichment. Heatmaps are oriented. Bottom panel: Metagene profiles of average (+/-  
683 standard error) of indicated ChIP-seq data around the TSS (+/- 10 kb) of paused and not  
684 paused genes, as indicated in pink and black, respectively. Genes are considered as “paused”  
685 if their pausing index (PI) is  $> 2$  (n=7,208). Genes are considered as a “not paused” if  $PI < 2$

686 (n=3,356). (B) Boxplots showing the relative enrichment of indicated ChIP-seq between  
687 paused and not paused genes. Genes are considered as paused if their pausing index (PI) is >  
688 2 (n=7,208). Right: boxplot showing the relative enrichment of ChIP-seq on the gene body  
689 (from + 50bp to TES). ns, not significant. “\*\*\*\*” = p-value < 2.2x10<sup>-16</sup>. (C) Overlap of mH2A1.1-  
690 regulated genes with paused genes. Enrichment of mH2A1.1-target genes with paused genes  
691 are measured using fisher exact tests. Of note, only mH2A1.1-target genes characterized by a  
692 PI were used to generate this Venn diagram.

693

694 **S10 Fig. mH2A1.1 favours Pol II pausing release.** (A) Biological replicates of ChIPqPCR of Pol  
695 II in control and mH2A1.1 KD conditions. The first biological replicate is shown Fig 4E. (B)  
696 ChIPqPCR of Pol II in control and mH2A1.1 KD conditions on mH2A1.1-activated genes that  
697 lose interactions with adjacent genomic regions. The first biological replicate in shown Fig 6H.

698

699 **S11 Fig. The mH2A1.1 isoform binds active enhancers and super-enhancers.** (A) “Putative”  
700 enhancers centered spearman correlation heatmap of ChIP-seq data. Correlations shown as  
701 in Fig1D. Enhancers are based on H3K27ac signal outside promoter regions using the ROSE  
702 package (Blinka et al., 2017). (B) Heatmap profiles showing indicated ChIP-seq data relative  
703 enrichment around the enhancers (+/- 1 kb). Colour intensity reflects the level of ChIP-seq  
704 enrichment. Each line represents an enhancer (from 1 to 23,371 enhancers). Enhancers are  
705 ranked according to the level of mH2A1.1 on enhancers, as indicated. (C) Same as in (A) but  
706 on “putative” super-enhancers. SEs were defined using the ROSE package based on H3K27ac  
707 signal outside promoters regions (Blinka et al., 2017).

708

709 **S12 Fig. The chromatin environment at enhancers of mH2A1.1-regulated genes.** (A) Boxplot  
710 showing the intensity of PChIC interactions between mH2A1.1-non affected genes, mH2A1.1-  
711 repressed genes (n=181) and mH2A1.1-activated genes (n=282) in control and mH2A1.1 KD  
712 conditions with their respective enhancers. Enhancers of mH2A1.1-regulated genes were  
713 determined using PChIC data and enhancers annotations (Materials and Methods). ns, not  
714 significant. “\*\*\*\*” = p-value < 2.2x10<sup>-16</sup>. Paired Wilcoxon test were used to compare control  
715 and mH2A1.1 KD conditions. (B) Heatmap profiles showing indicated ChIP-seq data relative  
716 enrichment around the TSS (+/- 10 kb) of mH2A1.1-regulated genes (right) and their  
717 associated enhancers (+/- 1kb) (left). Enhancers of mH2A1.1-regulated genes were  
718 determined using PChIC data and enhancers annotations (Materials and Methods). More than  
719 one enhancer can significantly be in interaction with mH2A1.1-regulated genes. To simplify,  
720 only one enhancer per gene was randomly conserved to generate those heatmaps. Top:  
721 mH2A1.1-repressed genes (1 to 95). Bottom: mH2A1.1-activated genes (1 to 112). Genes are  
722 ranked according to their expression level differences between the control and mH2A1.1 KD  
723 conditions. Some mH2A1.1-target genes are not present in those heatmaps because they do  
724 not have PChIC significant interactions with an enhancer or are not present in the PChIC  
725 database. Colour intensity reflects level of ChIP-seq enrichment. TSS-centered heatmap  
726 profiles are orientated. (B) Boxplots comparing the relative enrichment of indicated ChIP-seq



727 between the enhancers of mH2A1.1-repressed genes and the enhancers of mH2A1.1-  
728 activated genes. ns, not significant. “\*\*\*\*” = p-value <  $2.2 \times 10^{-16}$ .

729

730 **S13 Fig. The chromatin environment at enhancers of mH2A1.1-regulated genes.** (A) Heatmap  
731 profiles showing indicated ChIP-seq data relative enrichment around the TSS (+/- 10 kb) of  
732 mH2A1.1-regulated genes (right) and their associated enhancers (+/- 1kb) (left). Same legend  
733 as in S12B. (B) Boxplots showing the relative enrichment of indicated ChIP-seq between the  
734 enhancers of mH2A1.1-repressed genes and the enhancers of mH2A1.1-activated genes. ns,  
735 not significant. “\*” : p < 0.05, “\*\*” : p < 0.01, “\*\*\*\*” = p-value <  $2.2 \times 10^{-16}$ .

736

737 **S14 Fig. Examples of local genomic interactions of mH2A1.1-target genes.** (A) Snapshots of  
738 PCHiC data set (replicates n°2) on one mH2A1.1-repressed gene (left) and one mH2A1.1-  
739 activated gene (right) in control and mH2A1.1 KD conditions, as indicated. Same legend as in  
740 Fig 6C. (B) Same as in (A) but for one mH2A1.1-repressed gene on the top and a mH2A1.1-  
741 activated gene on the bottom. Replicates n°1 and 2 are shown. (C) Snapshots of PCHiC data  
742 set of 4 mH2A1.1-activated genes as indicated, in control and mH2A1.1 KD conditions.  
743 Replicates n°1 and 2 are shown. (D) As in (C) but for two mH2A1.1-activated genes used in Fig  
744 4E. The gene *GTF2H3* was not sequenced in our PCHiC data.

745

746 **S15 Fig. The isoform mH2A1.1 modulates expression of genes involved in cell cycle, DNA  
747 repair and cell shape.** (A) List of gene ontology (GO) terms for mH2A1.1 activated-genes. The  
748 most significantly regulated ontologies were kept, based on their adjusted p-value and are  
749 shown in three different classes, Biological Process (upper panel), Molecular function (middle  
750 panel) and Cellular Component (lower panel). A full list of enriched GO terms is provided in S4  
751 Table. (B) As in (A) but for mH2A1.1-repressed-genes. (C) Fisher test heatmap showing  
752 enrichment of indicated mH2A1.1-target genes with genes divided in 5 equal size categories  
753 as a function of their pausing index. Stars indicate the significance of the fisher exact tests;  
754 color map and values present in each square highlight the log<sub>2</sub> odd ratio (LOR) of the fisher  
755 exact test. N indicates the number of genes used for the analysis.

756

757

758 **S16 Fig. mH2A1.2 promotes cell migration in MDA-MB231 cells.** (A) Representative DIC  
759 microscopy images of WT, mH2A1.1 KD (two different siRNA) and mH2A1.2 KD MDA-MB231  
760 cells. Scale bar = 100 μM. (B) Immunofluorescence of Actin (up), Tubulin-α (middle) and  
761 Vimentin (down) in WT, mH2A1.1 KD and mH2A1.2 KD MDA-MB231 cells. Nuclei are stained  
762 with Hoechst. Scale bar = 20 μM. (C) Boyden chamber assay representative images of WT,  
763 mH2A1.1 KD and mH2A1.2 KD MDA-MB231 cells. Only migrated cells are labelled in purple.  
764 Scale bar = 150 μM. (D) Quantification of Boyden chamber assay presented in (C). Error bar  
765 represents s.d from n=3 independent experiments as illustrated in (C). “\*” = p-value (p) < 0.05,  
766 \*\*, p < 0.01.

767

768 **Tables**

769

770 S1 Table: mH2A1.1-target genes

771 S2 Table: List of antibodies

772 S3 Table: List of NGS data

773 S4 Table: Gene ontology

774 S5 Table: siRNA sequences

775 S6 Table: qPCR primers

776

777

778 **Materials and Methods**

779

780 **Cell culture.** MDA-MB231, HEK-293T and MCF7 cell lines were purchased from ATCC, and  
781 were maintained and amplified in Dulbecco's Modified Eagle's (DMEM) for HEK-93T and MDA-  
782 MB231 cells, and in DMEM-F12 for MCF7 cells, supplemented with gentamycin (50 µg/ml)  
783 (Gibco), fetal bovine serum (10%, Gibco) and sodium pyruvate (100 mM, Sigma). Cells were  
784 maintained in a humidified incubator at 37°C with 5% CO<sub>2</sub>. Cells lines were regularly tested for  
785 mycoplasma infection (MycoAlert, Lonza). In Montpellier, MDA-MB231 cells were cultured in  
786 DMEM supplemented with 10% fetal calf serum and penicillin/streptomycin (100 µg/ml each)  
787 and regularly tested for mycoplasma infection.

788

789 **Transfection of siRNAs and plasmids.** At 30-50% confluence, transfection of siRNA (11nM)  
790 was performed using INTERFERin (Polyplus-Ozyme) according to the manufacturer's protocol.  
791 Cells in control condition were transfected with INTERFERin without any siRNA. Transfection  
792 of plasmid (1µg) was done with FuGene HD (Promega) according to the manufacturer's  
793 protocol. siRNA and plasmids are available in S5 Table. Two- and three-days post plasmid and  
794 siRNA transfection respectively, cells were recovered for experiments.

795

796 **Western blotting.** Cells were lysed and subjected to western blot analysis as previously  
797 described (Yang et al., 2014). Briefly, proteins extracts were separated in 10% polyacrylamide  
798 (1:125 bisacrylamide:acrylamide) SDS gels, transferred onto nitrocellulose membrane (Bio-  
799 Rad) and blocked with PBS-Tween 0.4% - Milk 5% for 1h at RT with rotation. Membranes were  
800 then incubated with primary antibodies overnight (O/N) at 4°C in PBS-Tween 0.4% - Milk 5%  
801 with rotation (or 1h30 at RT). Primary antibodies are described in the S2 Table. Rabbit anti-  
802 mH2A1.1 antibody was generated according to immunization protocol from Agro-Bio - La  
803 fierté Saint-Aubin – France. Membranes were next incubated with secondary antibody in PBS-  
804 Tween 0.4% - Milk 5% 1h at RT with rotation and the signal was detected using  
805 chemiluminescence. Secondary antibodies are described in the S2 Table. Signal  
806 quantifications were carried out with Image Lab software (Bio-Rad).

807

808 **RNA extraction, reverse transcription and quantitative real-PCR (qRT-PCR).** Total RNA was  
809 isolated using the RNAeasy midi kit (Qiagen). Purified RNA was reversed transcribed to cDNA  
810 using Maxima H Minus first Strand cDNA synthesis kit (Promega). The sequences of the  
811 primers used are available in S6 Table. RT-PCR was performed using iTaq Universal SYBR Green  
812 (Bio-Rad) according to manufacturer's instructions. At least two independent experiments  
813 were performed for each condition. The relative expression levels of mRNA were normalized  
814 to RPLP0 mRNA expression and evaluated according to the  $2^{-\Delta\Delta Ct}$  method (Rao et al., 2013).

815  
816 **Fluorescence microscopy.** Two- or three-days post-transfection, cells were fixed with 4 %  
817 paraformaldehyde for 15 min for MDA-MB231 cells and 10 min for HEK-293T at RT. Cells  
818 permeabilization was carried out using 0.1 % Triton X-100 in PBS for 10 min at RT. Cells were  
819 then blocked with 5 % BSA-0.15% Tween in PBS for 1h at RT. Next, cells were incubated with  
820 primary antibody O/N at 4°C. Cells were then incubated with Alexa conjugated secondary  
821 antibody for 1h at RT. Actin was labelled using cytoPainter Phalloidin iFluor diluted 1:1000  
822 with secondary antibody according to the manufacturer's protocol (Abcam, Ab176759).  
823 Antibody references and dilutions are provided in S2 Table. The coverslips were finally  
824 incubated with Hoechst (Invitrogen, 33342) for 30 min and then mounting with mounting  
825 media (Vectashield). Images were acquired with Zeiss LSM 710 big confocal microscope using  
826 an x63 PL APO oil DIC On 1.4 objective for all experiments. Images were taken in Z-stacks with  
827 a voxel size of 300 nm. A Z-stack or max projection intensity of Z-stacks are shown.

828  
829 **Chromatin immunoprecipitation and library preparation.** Cells were cross-linked in DMEM  
830 containing 1.2 % of paraformaldehyde at RT for 10 min with rotation. Cross-link was stopped  
831 by the addition of glycine to a final concentration of 0.125M for 5 min. Cell were harvested  
832 and lysed in cell lysis buffer (10 mM Tris-HCl pH 7.4, 15 mM NaCl, 60 mM KCL, 1 mM EDTA,  
833 0.1 mM EGTA, 0.2% NP-40, 5% sucrose). After 10 min in ice, cell lysis was amplified with a 2mL  
834 dounce (Kimble Chase) to enhance the nuclei separation from cytoplasm. Cell lysis buffer  
835 containing lysed cells was deposit up to a pillow buffer (10 mM Tris-HCl pH 7.4, 15 mM NaCl,  
836 60 mM KCL, 1 mM EDTA, 0.1 mM EGTA, 0.2% NP-40, 10% sucrose). Nuclei were then pelleted  
837 by centrifugation and wash with washing buffer (10 mM Tris-HCl pH 7.4, 15 mM NaCl, 60 mM  
838 KCL). Nuclei were then resuspended in sonication buffer (50 mM Tris-HCl pH 7.5, 150 mM KCl,  
839 5 mM EDTA, 1% NP-40, 0.1% SDS, 0.5 % Sodium deoxycholate, Protease Inhibitor (Roche)).  
840 Chromatin was sheared using a Bioruptor (Diagenode) (30 cycles, 30 sec ON/ 30 sec OFF) in  
841 order to obtain chromatin fragments with an average size of 300-500 bp. Quality and size of  
842 chromatin fragments was monitored by ethidium-bromide stained agarose gel  
843 electrophoresis after DNA purification. Then, 100 µg of DNA was incubated with antibody O/N  
844 at 4°C on a rotation wheel. Antibodies are described in the S2 Table. 3 mg of protein A  
845 magnetic dynabeads (Sigma) were added for 3h at 4°C on a rotation wheel.  
846 Immunoprecipitates were then exposed to serial washes for 5 min each on a rotation wheel  
847 at 4°C in the following buffers (two times/buffer): WB<sub>I</sub>: 2 mM EDTA, 20 mM Tris pH 8.1, 1 %  
848 Triton 100X, 150 mM NaCl, WB<sub>II</sub>: 2 mM EDTA, 20 mM Tris pH 8.1, 1 % Triton X100, 500 mM

849 NaCl, WB<sub>III</sub>: 1 mM EDTA, 10 mM Tris pH 8.1, 250 mM LiCl, 1 % Sodium deoxycholate, 1 % NP-  
850 40 and WB<sub>IV</sub>: 1 M EDTA, 10 mM Tris pH 8.1. Chromatin was eluted from the magnetic beads  
851 with DNA isolation buffer (2% SDS, 0.1 M NaHCO<sub>3</sub>) for 1h at 65°C under agitation. Extracts  
852 were reverse-crosslinked with SDS O/N at 65°C. RNAs were degraded with RNase A and  
853 proteins were finally degraded with proteinase K. Same procedure was performed for input  
854 (10 µg of DNA). DNA was finally extracted with a phenol-chloroform extraction. Quantity and  
855 quality of DNA was tested with a nanodrop (NanoDrop2000, Thermo). Samples were  
856 sequenced with the GeT core facility, Toulouse, France (<http://get.genotoul.fr>). Sequencing  
857 was done HiSeq3000-HWI-J00115 according to the manufacturer's protocol. Same procedure  
858 was done for ChIPqPCR. The sequences of the primers used for the qPCR are available in S6  
859 Table. For western blot analysis, extracts (Input (10% IP), No immunoprecipitated (NoIP)  
860 fraction and IP fraction were processed as ChIP extract but not incubated with RNAase A and  
861 proteinase K. Extracts were then subjected to western blot analysis as previously described in  
862 the western blot paragraph. To compare different extracts, we loaded 2 % of Input, 0.5 % of  
863 Input, 0.5 % of NoIP fraction and 20% of IP fraction. Percentages are relative to the DNA  
864 quantity used for ChIP.

865  
866       ChIP-seq of H3K27ac, H3K4me1, H3K4me3, H3K36me3 and Pol II were done essentially  
867 as previously described (Tolza et al., 2019)(Bejjani et al., 2021). Briefly, after cell fixation with  
868 1 % of paraformaldehyde at RT for 5 min, cells were incubated in cell lysis buffer (PIPES 5 mM,  
869 KCL 85 mM, NP40 0.5%, Na Butyrate 10 mM, protease inhibitors) for 10 min on ice. After mild  
870 centrifugation, nuclei were lysed in Nuclei Lysis Buffer (Tris-HCL 50 mM pH 7.5, SDS 0.125%,  
871 EDTA 10 mM, Na Butyrate 10 mM, protease inhibitors) at 4°C for 2h and, then, sonicated for  
872 10 cycles at 4°C using BioruptorPico device from Diagenode. For immunoprecipitation of  
873 H3K4me1, H3K4me3 and H3K27ac, 150 µl of chromatin (equivalent to 4.10<sup>6</sup> cells) and 4.5 µg  
874 of the corresponding antibodies were used. For Pol II, 850 µl of chromatin (equivalent to  
875 22.10<sup>6</sup> cells) and 20 µg of the corresponding antibody were used. Each ChIP were sequenced  
876 by the MGX genomic platform (Montpellier) using the Hi-seq2500 Illumina sequencer.  
877 ChIPqPCR of Pol II were done following the same protocol as for Pol II ChIP-seq. qPCR were  
878 done on ChIP samples and Input (1% of DNA used for ChIP). qPCR results are normalized using  
879 the signal obtained with the input (% of input). Primers used are given in S6 Table.

880  
881 **Strand-specific total RNA library preparation.** Total RNA was isolated using the RNAeasy midi  
882 kit (Qiagen). RNA-seq quality and quantity control were performed using a Nanodrop  
883 (NanoDrop2000, Thermo) and BioAnalyser. Library preparation and sequencing was done by  
884 GeT core facility, Toulouse, France (<http://get.genotoul.fr>) with the kit TruSeq Stranded total  
885 RNA according to manufacturer's institutions. Sequencing was done HiSeq3000-HWI-J00115  
886 according to the manufacturer's protocol.

887  
888 **ChIP-seq data processing.** The quality of the reads was estimated with FastQC (Illumina,  
889 1.0.0). Published ChIP-seq data of H3K9me3 (GSM2258862), H3K27me3 (GSM2258850) and

890 corresponding input (GSM2258864) in MDA-MB231 cells were downloaded from  
891 GEODATASETS (<https://www.ncbi.nlm.nih.gov/geo/>, GEO accession number : GSE85158)  
892 (Franco et al., 2018), and reanalyzed as subsequently described. Published ChIP-seq data of  
893 BRD4 (GSM2862187), RING1B (GSM2862179), PCGF2 (GSM2862185) and H2AK119ub  
894 (GSM2862181) in MDA-MB231 cells were downloaded from GEODATASETS  
895 (<https://www.ncbi.nlm.nih.gov/geo/>, GEO accession number : GSE107176) (Chan et al., 2018),  
896 and reanalyzed as subsequently described. Published ChIP-seq data of H3.3 (GSM3398219),  
897 and corresponding input (GSM3398220) in MDA-MB231 cells were downloaded from  
898 GEODATASETS (<https://www.ncbi.nlm.nih.gov/geo/>, GEO accession number : GSE120313)  
899 (Ben Zouari et al., 2019) and reanalyzed as subsequently described. Published ChIP-seq data  
900 of PARP1 (GSM1517306) in MDA-MB231 cells were downloaded from GEODATASETS  
901 (<https://www.ncbi.nlm.nih.gov/geo/>, GEO accession number : GSE61916) (Nalabothula et al.,  
902 2015) and reanalyzed as subsequently described. Sequenced reads were aligned to the human  
903 genome Assembly GRCh38 using STAR (2.5.1) algorithm with defaults parameters (Dobin et  
904 al., 2013). Details are supplied in S3 Table. Low quality reads were then filtered out using  
905 Samtools (Samtools, options -q 10 -view) (Li et al., 2009). Conversion of BAM files to bigWig  
906 files was performed with Bamcompare tool (DeepTools utilities v3.1.3) (Ram et al., 2016).  
907 Corresponding ChIP-seq data generated from genomic DNA (Input) were used as control for  
908 every bigWig files normalization (options: --normalizeUsing RPKM --operation subtract --  
909 binSize 50 bp --smoothLength 150 bp). Peaks were determined with the enrichR function of  
910 NormR package (Helmuth J, 2018). NormR parameters were adjusted depending on the bigwig  
911 profiles for each ChIPseq data. mH2A1.1-specific peaks were used for all analysis and  
912 correspond to the common peaks between mH2A1.1 and mH2A1 ChIPseq. Number of peaks  
913 for each ChIP-seq data are listed in S3 Table. All downstream analyses were mainly performed  
914 with R studio. ChIP-seq signal and peaks positions visualization were obtained with IGV  
915 (Thorvaldsdóttir et al., 2013). Boxplots were done with ggplot2 (H. Wickham., 2016).  
916 Distributions of mH2A1 isoforms and H3K27me3/H3K9me3 common peaks identified at  
917 specific genomic features were calculated using ChIPseeker package with default parameters  
918 (**Figs 1E and S4D**) (Yu et al., 2015). Statistical analyses are presented in Statistics and  
919 Reproducibility paragraph.

920  
921 **Identification of “putative” enhancers and super-enhancers.** All putative enhancers were  
922 determined with ROSE utility tools based on H3K27ac signal outside TSS (+/- 2 kb) to avoid TSS  
923 bias (Fig 5A-B) (Blinka et al., 2017). TSS annotation is based on  
924 TxDb.Hsapiens.UCSC.hg38.knownGene release (n=25,668 annotated genes). Super-enhancers  
925 were determined with ROSE utility tools based on H3K27ac signal (options : stitching\_distance  
926 = 12.5 kb and TSS\_exclusion\_zone\_size : 2500 bp) (**Fig 5D-E**) (Lovén et al., 2013; Whyte et al.,  
927 2013).

928  
929 **Pol II pausing index calculation.** Pausing index (PI) was defined as previously (X. Zhang et al.,  
930 2017), which is the ratio of Pol II density in the promoter-proximal region ([-30;300] bp



931 centered on TSS) to the Pol II density in the transcribed regions (TSS + 300 bp to TES). Gene  
932 annotation is based on TxDb.Hsapiens.UCSC.hg38.knownGene release. Density of Pol II was  
933 calculated using the Pol II bigWig file, normalized using --log2 option (DeepTools utilities  
934 v3.1.3) (Ram et al., 2016), and the negative values were replaced by zeros. Genes with a width  
935 smaller than 1 kb were excluded from the analysis. Moreover, pausing index were not  
936 calculated for the genes having a Pol II density lower than 1.2 in the promoter-proximal region  
937 and a Pol II density in the transcribed regions lower than 0. Using this threshold, we only  
938 calculated pausing index for transcribed genes having a Pol II binding (n=10,564 genes).  
939 “Paused” genes were defined as genes that have a PI upper to 2 (n=7,208) (Day et al., 2016)..  
940 “Not paused” genes were defined as genes that have a PI lower to 2 (n=3,356).

941  
942 **Venn diagrams.** Intersection of peaks were determined with the function findOverlaps() from  
943 GenomicRanges package (Lawrence et al., 2013). To note that for two ChIP-seq peaks  
944 intersections, only number of overlaps is counted and not the number of each peaks contained  
945 per overlap. This particularity explained why number of peaks changes between venn  
946 diagrams for a same ChIP-seq. The area-proportional Venn diagrams were drawn based on  
947 images generated by Vennerable package. Enrichment tests associated to Venn diagrams are  
948 explained in Statistics and Reproducibility paragraph.

949  
950 **Correlation heatmaps.** Correlation heatmaps using bigWig of indicated ChIP-seq were done  
951 with multiBigwigSummary (with or without the options: -bins) and plotCorrelation (option: -  
952 spearman correlation heatmap) from DeepTools utilities (3.1.3) (Ram et al., 2016).

953  
954 **Fisher test heatmaps.** Fisher test heatmaps were done using ggplot2 (H. Wickham., 2016).  
955 Each score on the heatmap shows the results of a fisher exact test between the two groups  
956 tested. The positive or negative association between the two groups tested is established by  
957 the odd ratio, represented by the “score” ( $\log_2(\text{Odd Ratio}) = \text{LOR}$ ) and the color scale, that is  
958 proportional to the score. Significatively of the overlap is assessed by the p-value, represented  
959 by the stars (\*  $\leq 0.05$  and highly significant when \*\*  $\leq 0.01$ ; \*\*\*  $\leq 0.001$ ; \*\*\*\*  $\leq 0.0001$ ). Groups  
960 used for the analysis were divided in equal size according to the ChIP-seq signal.

961  
962 **Metagene profiles.** Metagene analysis profiles were performed with R Seqplot package  
963 (Stempor & Ahringer, 2016) using bigWig files (function getPlotSetArray and plotAverage)  
964 centered on TSS (+/- 2kb) or from TSS to TES (+/- 2kb). Profiles correspond to the mean value  
965 (+/- the standard error). Values upper to 2 standard deviation (sd), considered as outliers,  
966 were removed and not used to generate the profiles. Heatmaps profiles were also performed  
967 with R Seqplot package using bigwig files (function getPlotSetArray and plotHeatmap)  
968 (Stempor & Ahringer, 2016). Some heatmaps profiles were also ranked according to ChIPseq  
969 signal, PI index or gene expression log2Fold change. On all heatmaps, colour intensity reflects  
970 level of ChIP-seq enrichment. Colour intensity autoscale were always used excepted for  
971 heatmaps **S12B** and **S13A** to compared to relative enrichment between mH2A1.1-target genes

972 and their associated enhancers. On profiles and heatmaps, gene directionality was not  
973 ignored, meaning that all gene bodies are artificially placed on the right place of the plots.

974

975 **BigWig signal quantification.** BigWig signals of indicated ChIP-seq data were calculated with  
976 R studio based on bigWig files. For all the figures, the sum bigWig file (bin of 50 bp) was  
977 calculated on specific genomic regions and normalized by the width of the specific genomic  
978 regions.

979 **RNA-seq analysis.** The quality of the reads was estimated with FastQC (Illumina, 1.0.0). The  
980 reads were mapped to the human reference genome GRCh38 using the default parameters of  
981 STAR (2.5.1) (Dobin et al., 2013). Details are supplied in S3 Table. Low quality reads and  
982 duplicates were then filtered out using SAMtools (Samtools, options -q 10 -view ; -rmdup) (Li  
983 et al., 2009). Unstranded normalized bigwig files in RPKM were obtained with Bamcompare  
984 tool (DeepTools utilities v3.1.3) (options: --normalizeUsing RPKM --operation subtract --  
985 binSize 50 bp). (Ram et al., 2016). Gene counts were performed with htseq-count utilities with  
986 default parameters (0.8.0) (Stempor & Ahringer, 2016). FPKM for all genes were calculated  
987 with the formula :  $FPKM = (RC_g \times 10^6) / (RC_p \times L)$  where  $RC_g$  corresponds to the number of reads  
988 mapped to the gene,  $RC_p$  to the number of reads mapped to all protein-coding genes and L,  
989 the Length of the gene in base pairs. FPKM gene counts in control condition were used to  
990 classify genes according to their gene expression level in 4 equal size categories (Silent  
991 (n=5,625), low expression (n=5,625), middle expression (n=5,625) and high expression  
992 (n=5,625)). FPKM gene counts in mH2A1.1 KD condition were also calculated and used to  
993 generated the **Fig 1B**. Differential expression analysis was performed with DESeq2 package  
994 (Love et al., 2014) with cutoff  $|FC| > 1.5$  and  $padj < 0.1$ . Corresponding volcano plot was done  
995 with EnhancedVolcano package (Kevin Blighe, Sharmila Rana, 2018) (**Fig 1A**). The mH2A1.1 KD  
996 de-regulated genes are listed in S1 Table.

997

998 **Promoter Capture HiC and library preparation.** PCHIC data were generated on MDA-MB 231  
999 cells in control and mH2A1.1 KD cell using the siRNA#1 (see Methods part “Transfection of  
1000 siRNA and plasmids and S5 Table). PChi-C was essentially performed as in (Schoenfelder et al.,  
1001 2018), using nearly the same promoter library as (Mifsud et al., 2015) (omitting probes from  
1002 chromosomes 8, 9 and X).

1003

1004 **Promoter Capture HiC analysis.** ChiCMaxima\_calling was done using the same default  
1005 parameters and merging of replicate results as in Ben Zouari et al., after processing the fastq  
1006 files with custom scripts essentially performing the same analysis as HiCUP (Wingett et al.,  
1007 2015). Comparison of number of called interactions between subgroups were done **Fig 6A**.  
1008 Intensity of interactions were estimated based on CHi-C read counts for each biological  
1009 replicate. Only reads > 5 for each biological replicate were kept and interactions between a  
1010 bait and the other-end closer than 1.5 Mbp. Finally, for each interaction, read counts were

1011 quantile normalized using the function “*normalizeBetweenArrays*” from the LIMMA package  
1012 (Ritchie et al., 2015). Means between biological replicates were used. ChICMaxima Browser  
1013 were used to generate PChIC profiles (<https://github.com/yousra291987/ChICMaxima>) (Ben  
1014 Zouari et al., 2019). ChICMaxima-called and merged interactions were overlapped with  
1015 enhancers using the *findOverlaps* function from the R GenomicRanges package (Lawrence et  
1016 al., 2013). More than one enhancer can significantly be in interaction with mH2A1.1-regulated  
1017 genes. To simplify, only one enhancer per gene was conserved to generate the heatmaps in  
1018 **S12B** and **S13A**. Some mH2A1.1-target genes are not present in those heatmaps because they  
1019 do not have PChIC-called interactions with an enhancer or did not have PChIC capture  
1020 oligonucleotides.

1021 **GO analysis.** GO analysis was performed with LIMMA package (`--function goana`) (3.8) (Ritchie  
1022 et al., 2015) and corresponding GO terms are supplied in the S4 Table. Selection of genes  
1023 related to their functions was done with *biomaRt* package (function *getBM()*) (Durinck et al.,  
1024 2005, 2009). We took genes related to: cytoskeleton (GO:0005856), cell adhesion  
1025 (GO:0007155), Cilium (GO:0005929) and cell junction (GO:0030054) (n=2,509) using  
1026 `attributes= “ensemble gene_id”` annotation from *biomaRt* package. Overlaps of those genes  
1027 with mH2A1.1-regulated genes were done (mH2A1.1-activated (n=87/533), mH2A1.1-  
1028 repressed genes (n=71/412). We took genes related to cell cycle (GO:0007049), cell cycle  
1029 process (GO:0022402), cell division (GO:0051301) and cell growth (GO:0016049). (n=656).  
1030 Overlaps of those genes with mH2A1.1-regulated genes were done (mH2A1.1-activated  
1031 (n=64/533), mH2A1.1-repressed genes (n=18/412). We finally took genes related to DNA  
1032 repair (GO:0006281), cellular response to DNA damage stimulus (GO:0006974) (n=533).  
1033 Overlaps of those genes with mH2A1.1-regulated genes were done (mH2A1.1-activated  
1034 (n=37/533), mH2A1.1-repressed genes (n=4/412). For fisher test heatmap with PI, only genes  
1035 having a PI were used. N indicates the number of genes used for the analysis in Fig 4B, Fig 7D  
1036 and Fig 15C.

1037  
1038  
1039 **Transwell migration assay.** Transwell migration assays were performed using Transwell plates  
1040 with 0.8  $\mu\text{m}$  pore polycarbonate membranes (Corning Transwell, Sigma). Three days post  
1041 siRNA transfection, MDA-MB231 cells were seeded in the upper chamber without FBS and  
1042 allowed to invade to the reverse side of the chamber under chemoattractant condition with  
1043 10% FBS medium in the lower chamber. Following incubation for 16h at 37°C, the cells were  
1044 fixed with 3.7% formaldehyde for 2 min at RT. Cells permeabilization was carried out with  
1045 methanol incubation for 20 min at RT. Cells were then stained with Giesma for 15 min at RT.  
1046 Same final total cell number between conditions was always checked by wide field microscope  
1047 to avoid proliferation bias for migratory cell comparison. Not migrated cells were finally  
1048 removed from the upper chamber by using a cotton swab. Migrated cells adhering to the  
1049 underside of the chamber were photographed using a light microscope at x200 magnification

1050 (Invitrogen EVOS Digital Color Fluorescence Microscope). Cell counting was done with ImageJ  
1051 in ten different fields per condition (Caroline A Schneider, 2012). Three independent  
1052 experiments were performed for each condition.

1053  
1054 **Statistics and reproducibility.** All western blot, RTqPCR and Boyden Chamber assay  
1055 experiments were repeated at least twice as independent biological replicates and results are  
1056 presented as mean +/- sd. All statistical analyses were done with R. For Western blot, RTqPCR  
1057 and Boyden Chamber, Wilcoxon tests were used to compare mean values between conditions.  
1058 p-values were considered as significant when  $* \leq 0.05$  and highly significant when  $** \leq 0.01$ ;  
1059  $*** \leq 0.001$ ;  $**** \leq 0.0001$ . Fisher exact test were used to performed enrichment test of ChIP-  
1060 seq peaks. Base sets were defined from all the ChIP-seq data or based on TSS annotations.

1061  
1062 **Data availability.** ChIP-seq, RNA-seq and PCHiC data have been deposited to GEO under  
1063 accession number GSE140022. Additional data are available upon reasonable request.

1064

## 1065 **Acknowledgements**

1066  
1067 We thank M. Buschbeck from JCLR Institute at Barcelona for kindly providing Flag-mH2A1.1  
1068 and Flag-mH2A1.2 expression plasmids. ChIP-seq data against mH2A1.1 and mH2A1 isoforms  
1069 as well as RNA-seq data were performed in collaboration with the GeT core facility, Toulouse,  
1070 France (<http://get.genotoul.fr>), and were supported by France Génomique National  
1071 infrastructure, funded as part of “Investissement d’avenir” program managed by Agence  
1072 Nationale pour la Recherche (contract ANR-10-INBS-09) and by the Fondation Recherche  
1073 Medical (DEQ43940 to O.C team including A.H). We are grateful to the Genotoul  
1074 bioinformatics platform Toulouse Occitanie (Bioinfo Genotoul) for providing help and/or  
1075 computing and/or storage resources. We thank Marc Piechaszky and Sylvain Egloff for critical  
1076 reading of the manuscript. We acknowledge support from the light imaging Toulouse CBI  
1077 platform. The work was generously funded by the Institut National du Cancer (INCA PL-BIO-  
1078 16-269) to KB.

1079

## 1080 **Author contributions**

1081  
1082 L.R, A-C.L and K.B conceived this study. F.M validated custom Ab  $\alpha$ mH2A1.1 antibody  
1083 specificity against mH2A1.1. L.R performed ChIP-seq against mH2A1 isoforms and RNA-seq.  
1084 I.E-J. and F.B performed ChIP-seq against active histone marks. T.S and N.K performed PCHIC  
1085 data. L.R, A.H and F.R realized bioinformatic analysis of all ChIP-seq and RNA-seq data. T.S, L.R  
1086 and A.H realized bioinformatic analysis of PCHIC data. Statistical analyses were done by A.H  
1087 and L.R. L.R performed all other experimental data. L.R, A-C.L, T.S and K.B designed  
1088 experiments and interpreted results. L.R, A-C.L and K.B wrote the manuscript with input from  
1089 all other authors. All authors read and corrected the manuscript.

1090

1091 **Competing interests**

1092

1093 The authors declare no competing interests.

1094

1095 **References**

1096

- 1097 Adelman, K., & Lis, J. T. (2012). Promoter-proximal pausing of RNA polymerase II: emerging roles in metazoans.  
1098 In *Nature reviews. Genetics* (Vol. 13, Issue 10, pp. 720–731). NIH Public Access.  
1099 <https://doi.org/10.1038/nrg3293>
- 1100 Angelov, D., Molla, A., Perche, P.-Y., Hans, F., Côté, J., Khochbin, S., Bouvet, P., & Dimitrov, S. (2003). The  
1101 histone variant macroH2A interferes with transcription factor binding and SWI/SNF nucleosome  
1102 remodeling. *Molecular Cell*, 11(4), 1033–1041. <http://www.ncbi.nlm.nih.gov/pubmed/12718888>
- 1103 Baranello, L., Wojtowicz, D., Cui, K., Devaiah, B. N., Chung, H. J., Chan-Salis, K. Y., Guha, R., Wilson, K., Zhang, X.,  
1104 Zhang, H., Piotrowski, J., Thomas, C. J., Singer, D. S., Pugh, B. F., Pommier, Y., Przytycka, T. M., Kouzine, F.,  
1105 Lewis, B. A., Zhao, K., & Levens, D. (2016). RNA Polymerase II Regulates Topoisomerase 1 Activity to Favor  
1106 Efficient Transcription. *Cell*, 165(2), 357–371. <https://doi.org/10.1016/j.cell.2016.02.036>
- 1107 Bejjani, F., Tolza, C., Boulanger, M., Downes, D., Romero, R., Maqbool, M. A., Zine El Aabidine, A., Andrau, J. C.,  
1108 Lebre, S., Brehelin, L., Parrinello, H., Rohmer, M., Kaoma, T., Vallar, L., Hughes, J. R., Zibara, K., Lecellier,  
1109 C. H., Piechaczyk, M., & Jariel-Encontre, I. (2021). Fra-1 regulates its target genes via binding to remote  
1110 enhancers without exerting major control on chromatin architecture in triple negative breast cancers.  
1111 *Nucleic Acids Research*, 49(5), 2488–2508. <https://doi.org/10.1093/nar/gkab053>
- 1112 Ben Zouari, Y., Molitor, A. M., Sikorska, N., Pancaldi, V., & Sexton, T. (2019). ChiCMaxima: A robust and simple  
1113 pipeline for detection and visualization of chromatin looping in Capture Hi-C. *Genome Biology*, 20(1).  
1114 <https://doi.org/10.1186/s13059-019-1706-3>
- 1115 Blinka, S., Reimer, M. H., Pulakanti, K., Pinello, L., Yuan, G.-C., & Rao, S. (2017). Identification of Transcribed  
1116 Enhancers by Genome-Wide Chromatin Immunoprecipitation Sequencing. *Methods in Molecular Biology*  
1117 (*Clifton, N.J.*), 1468, 91–109. [https://doi.org/10.1007/978-1-4939-4035-6\\_8](https://doi.org/10.1007/978-1-4939-4035-6_8)
- 1118 Buschbeck, M., & Hake, S. B. (2017). Variants of core histones and their roles in cell fate decisions,  
1119 development and cancer. *Nature Reviews Molecular Cell Biology*, 18(5), 299–314.  
1120 <https://doi.org/10.1038/nrm.2016.166>
- 1121 Cantariño, N., Douet, J., & Buschbeck, M. (2013). MacroH2A – An epigenetic regulator of cancer. *Cancer*  
1122 *Letters*, 336(2), 247–252. <https://doi.org/10.1016/j.canlet.2013.03.022>
- 1123 Caroline A Schneider, W. S. R. & K. W. E. (2012). NIH Image to ImageJ: 25 years of image analysis. *INMATEH -*  
1124 *Agricultural Engineering*, 9(7), 671–675. <https://doi.org/10.1038/nmeth.2089>
- 1125 Castillo-Lluva, S., Tan, C.-T., Daugaard, M., Sorensen, P. H. B., & Malliri, A. (2013). The tumour suppressor  
1126 HACE1 controls cell migration by regulating Rac1 degradation. *Oncogene*, 32(13), 1735–1742.  
1127 <https://doi.org/10.1038/onc.2012.189>
- 1128 Cathcart, J., Pulkoski-Gross, A., & Cao, J. (2015). Targeting matrix metalloproteinases in cancer: Bringing new  
1129 life to old ideas. In *Genes and Diseases* (Vol. 2, Issue 1, pp. 26–34). Chongqing Medical University.  
1130 <https://doi.org/10.1016/j.gendis.2014.12.002>
- 1131 Chan, H. L., Beckedorff, F., Zhang, Y., Garcia-Huidobro, J., Jiang, H., Colaprico, A., Bilbao, D., Figueroa, M. E.,  
1132 LaCava, J., Shiekhhattar, R., & Morey, L. (2018). Polycomb complexes associate with enhancers and  
1133 promote oncogenic transcriptional programs in cancer through multiple mechanisms. *Nature*  
1134 *Communications*, 9(1), 3377. <https://doi.org/10.1038/s41467-018-05728-x>
- 1135 Changolkar, L. N., Singh, G., Cui, K., Berletch, J. B., Zhao, K., Distech, C. M., & Pehrson, J. R. (2010). Genome-  
1136 wide distribution of macroH2A1 histone variants in mouse liver chromatin. *Molecular and Cellular*  
1137 *Biology*, 30(23), 5473–5483. <https://doi.org/10.1128/MCB.00518-10>
- 1138 Chen, H., Ruiz, P. D., Novikov, L., Casill, A. D., Park, J. W., & Gamble, M. J. (2014). MacroH2A1.1 and PARP-1  
1139 cooperate to regulate transcription by promoting CBP-mediated H2B acetylation. *Nature Structural &*  
1140 *Molecular Biology*, 21(11), 981–989. <https://doi.org/10.1038/nsmb.2903>
- 1141 Chen, P., Zhao, J., Wang, Y., Wang, M., Long, H., Liang, D., Huang, L., Wen, Z., Li, W., Li, X., Feng, H., Zhao, H.,  
1142 Zhu, P., Li, M., Wang, Q. F., & Li, G. (2013). H3.3 actively marks enhancers and primes gene transcription



- 1143 via opening higher-ordered chromatin. *Genes and Development*, 27(19), 2109–2124.  
1144 <https://doi.org/10.1101/gad.222174.113>
- 1145 Costanzi, C., & Pehrson, J. R. (1998). Histone macroH2A1 is concentrated in the inactive X chromosome of  
1146 female mammals. *Nature*, 628(1997), 1997–1999.
- 1147 Creyghton, M. P., Cheng, A. W., Welstead, G. G., Kooistra, T., Carey, B. W., Steine, E. J., Hanna, J., Lodato, M. A.,  
1148 Frampton, G. M., Sharp, P. A., Boyer, L. A., Young, R. A., & Jaenisch, R. (2010). Histone H3K27ac separates  
1149 active from poised enhancers and predicts developmental state. *Proceedings of the National Academy of  
1150 Sciences*, 107(50), 21931–21936. <https://doi.org/10.1073/pnas.1016071107>
- 1151 Crump, N. T., Ballabio, E., Godfrey, L., Thorne, R., Repapi, E., Kerry, J., Tapia, M., Hua, P., Lagerholm, C.,  
1152 Filippakopoulos, P., Davies, J. O. J., & Milne, T. A. (2021). BET inhibition disrupts transcription but retains  
1153 enhancer-promoter contact. *Nature Communications*, 12(1), 1–15. <https://doi.org/10.1038/s41467-020-20400-z>
- 1154 Dardenne, E., Pierredon, S., Driouch, K., Gratadou, L., Lacroix-Triki, M., Espinoza, M. P., Zonta, E., Germann, S.,  
1155 Mortada, H., Villemin, J.-P., Dutertre, M., Lidereau, R., Vagner, S., & Auboeuf, D. (2012). Splicing switch of  
1156 an epigenetic regulator by RNA helicases promotes tumor-cell invasiveness. *Nature Structural &  
1157 Molecular Biology*, 19(11), 1139–1146. <https://doi.org/10.1038/nsmb.2390>
- 1158 Day, D. S., Zhang, B., Stevens, S. M., Ferrari, F., Larschan, E. N., Park, P. J., & Pu, W. T. (2016). Comprehensive  
1159 analysis of promoter-proximal RNA polymerase II pausing across mammalian cell types. *Genome Biology*,  
1160 17(1). <https://doi.org/10.1186/s13059-016-0984-2>
- 1161 Dell’Orso, S., Wang, A. H., Shih, H.-Y., Saso, K., Berghella, L., Gutierrez-Cruz, G., Ladurner, A. G., O’Shea, J. J.,  
1162 Sartorelli, V., & Zare, H. (2016). The Histone Variant MacroH2A1.2 Is Necessary for the Activation of  
1163 Muscle Enhancers and Recruitment of the Transcription Factor Pbx1. *Cell Reports*, 14(5), 1156–1168.  
1164 <https://doi.org/10.1016/j.celrep.2015.12.103>
- 1165 Dobin, A., Davis, C. A., Schlesinger, F., Drenkow, J., Zaleski, C., Jha, S., Batut, P., Chaisson, M., & Gingeras, T. R.  
1166 (2013). STAR: ultrafast universal RNA-seq aligner. *Bioinformatics (Oxford, England)*, 29(1), 15–21.  
1167 <https://doi.org/10.1093/bioinformatics/bts635>
- 1168 Donati, B., Lorenzini, E., & Ciarrocchi, A. (2018). BRD4 and Cancer: going beyond transcriptional regulation.  
1169 *Molecular Cancer*, 17(1), 164. <https://doi.org/10.1186/s12943-018-0915-9>
- 1170 Douet, J., Corujo, D., Malinverni, R., Renaud, J., Sansoni, V., Posavec Marjanović, M., Cantariño, N., Valero, V.,  
1171 Mongelard, F., Bouvet, P., Imhof, A., Thiry, M., & Buschbeck, M. (2017). MacroH2A histone variants  
1172 maintain nuclear organization and heterochromatin architecture. *Journal of Cell Science*, 130(9), 1570–  
1173 1582. <https://doi.org/10.1242/jcs.199216>
- 1174 Doyen, C.-M., An, W., Angelov, D., Bondarenko, V., Mietton, F., Studitsky, V. M., Hamiche, A., Roeder, R. G.,  
1175 Bouvet, P., & Dimitrov, S. (2006). Mechanism of polymerase II transcription repression by the histone  
1176 variant macroH2A. *Molecular and Cellular Biology*, 26(3), 1156–1164.  
1177 <https://doi.org/10.1128/MCB.26.3.1156-1164.2006>
- 1178 Draheim, K. M., Chen, H. B., Tao, Q., Moore, N., Roche, M., & Lyle, S. (2010). ARRDC3 suppresses breast cancer  
1179 progression by negatively regulating integrin B4. *Oncogene*, 29(36), 5032–5047.  
1180 <https://doi.org/10.1038/onc.2010.250>
- 1181 Durinck, S., Moreau, Y., Kasprzyk, A., Davis, S., De Moor, B., Brazma, A., & Huber, W. (2005). BioMart and  
1182 Bioconductor: a powerful link between biological databases and microarray data analysis. *Bioinformatics  
1183 (Oxford, England)*, 21(16), 3439–3440. <https://doi.org/10.1093/bioinformatics/bti525>
- 1184 Durinck, S., Spellman, P. T., Birney, E., & Huber, W. (2009). Mapping identifiers for the integration of genomic  
1185 datasets with the R/Bioconductor package biomaRt. *Nature Protocols*, 4(8), 1184–1191.  
1186 <https://doi.org/10.1038/nprot.2009.97>
- 1187 Elrod, N. D., Henriques, T., Huang, K. L., Tatomer, D. C., Wilusz, J. E., Wagner, E. J., & Adelman, K. (2019). The  
1188 Integrator Complex Attenuates Promoter-Proximal Transcription at Protein-Coding Genes. *Molecular Cell*,  
1189 76(5), 738–752.e7. <https://doi.org/10.1016/j.molcel.2019.10.034>
- 1190 Franco, H. L., Nagari, A., Malladi, V. S., Li, W., Xi, Y., Richardson, D., Allton, K. L., Tanaka, K., Li, J., Murakami, S.,  
1191 Keyomarsi, K., Bedford, M. T., Shi, X., Li, W., Barton, M. C., Dent, S. Y. R., & Kraus, W. L. (2018). Enhancer  
1192 transcription reveals subtype-specific gene expression programs controlling breast cancer pathogenesis.  
1193 *Genome Research*, 28(2), 159–170. <https://doi.org/10.1101/gr.226019.117>
- 1194 Fu, Y., Lv, P., Yan, G., Fan, H., Cheng, L., Zhang, F., Dang, Y., Wu, H., & Wen, B. (2015). MacroH2A1 associates  
1195 with nuclear lamina and maintains chromatin architecture in mouse liver cells. *Scientific Reports*, 5(1), 1–  
1196 12. <https://doi.org/10.1038/srep17186>
- 1197 Gamble, M. J., Frizzell, K. M., Yang, C., Krishnakumar, R., & Kraus, W. L. (2010). The histone variant macroH2A1  
1198 marks repressed autosomal chromatin, but protects a subset of its target genes from silencing. *Genes &  
1199*

- 1200 *Development*, 24(1), 21–32. <https://doi.org/10.1101/gad.1876110>
- 1201 Gamble, M. J., & Kraus, W. L. (2010). Multiple facets of the unique histone variant macroH2A: From genomics  
1202 to cell biology. *Cell Cycle*, 9(13), 2568–2574. <https://doi.org/10.4161/cc.9.13.12144>
- 1203 Giner-Laguada, N., & Vidal, M. (2020). Functions of Polycomb Proteins on Active Targets. *Epigenomes*, 4(3), 17.  
1204 <https://doi.org/10.3390/epigenomes4030017>
- 1205 H. Wickham. (2016). ggplot2: Elegant Graphics for Data Analysis. *Springer-Verlag New York*, 174(1), 245–246.  
1206 [https://doi.org/10.1111/j.1467-985X.2010.00676\\_9.x](https://doi.org/10.1111/j.1467-985X.2010.00676_9.x)
- 1207 Helmuth J, C. H. (2018). normr: Normalization and difference calling in ChIP-seq data . *R Package Version 1.8.0*,  
1208 <https://github.com/Your-Highness/NormR>, 2018.
- 1209 Hodge, D. Q., Cui, J., Gamble, M. J., & Guo, W. (2018). Histone Variant MacroH2A1 Plays an Isoform-Specific  
1210 Role in Suppressing Epithelial-Mesenchymal Transition. *Scientific Reports*, 8(1).  
1211 <https://doi.org/10.1038/s41598-018-19364-4>
- 1212 Hurtado-Bagès, S., Posavec Marjanovic, M., Valero, V., Malinverni, R., Corujo, D., Bouvet, P., Lavigne, A.-C.,  
1213 Bystricky, K., & Buschbeck, M. (2020). The Histone Variant MacroH2A1 Regulates Key Genes for Myogenic  
1214 Cell Fusion in a Splice-Isoform Dependent Manner. *Cells*, 9(5), 1109.  
1215 <https://doi.org/10.3390/cells9051109>
- 1216 Kake, S., Usui, T., Ohama, T., Yamawaki, H., & Sato, K. (2017). Death-associated protein kinase 3 controls the  
1217 tumor progression of A549 cells through ERK MAPK/c-Myc signaling. *Oncology Reports*, 37(2), 1100–  
1218 1106. <https://doi.org/10.3892/or.2017.5359>
- 1219 Kevin Blighe, Sharmila Rana, M. L. (2018). EnhancedVolcano: Publication-ready volcano plots with enhanced  
1220 colouring and labeling . <https://github.com/kevinblighe/EnhancedVolcano>, R package, 2018.  
1221 <https://github.com/kevinblighe/EnhancedVolcano>.
- 1222 Kim, J., Oberdoerffer, P., & Khurana, S. (2018). The histone variant macroH2A1 is a splicing-modulated  
1223 caretaker of genome integrity and tumor growth. *Molecular & Cellular Oncology*, 5(3), e1441629.  
1224 <https://doi.org/10.1080/23723556.2018.1441629>
- 1225 Kustatscher, G., Hothorn, M., Pugieux, C., Scheffzek, K., & Ladurner, A. G. (2005). Splicing regulates NAD  
1226 metabolite binding to histone macroH2A. *Nature Structural & Molecular Biology*, 12(7), 624–625.  
1227 <https://doi.org/10.1038/nsmb956>
- 1228 Lavigne, A.-C., Castells, M., Mermet, J., Kocanova, S., Dalvai, M., & Bystricky, K. (2014). Increased macroH2A1.1  
1229 Expression Correlates with Poor Survival of Triple-Negative Breast Cancer Patients. *PLoS ONE*, 9(6),  
1230 e98930. <https://doi.org/10.1371/journal.pone.0098930>
- 1231 Lavigne, M. D., Vatsellas, G., Polyzos, A., Mantouvalou, E., Sianidis, G., Maraziotis, I., Agelopoulos, M., &  
1232 Thanos, D. (2015). Composite macroH2A/NRF-1 Nucleosomes Suppress Noise and Generate Robustness  
1233 in Gene Expression. *Cell Reports*, 11(7), 1090–1101. <https://doi.org/10.1016/j.celrep.2015.04.022>
- 1234 Lawrence, M., Huber, W., Pagès, H., Aboyoun, P., Carlson, M., Gentleman, R., Morgan, M. T., & Carey, V. J.  
1235 (2013). Software for Computing and Annotating Genomic Ranges. *PLoS Computational Biology*, 9(8).  
1236 <https://doi.org/10.1371/journal.pcbi.1003118>
- 1237 Lee, J. E., Park, Y. K., Park, S., Jang, Y., Waring, N., Dey, A., Ozato, K., Lai, B., Peng, W., & Ge, K. (2017). Brd4  
1238 binds to active enhancers to control cell identity gene induction in adipogenesis and myogenesis. *Nature*  
1239 *Communications*, 8(1). <https://doi.org/10.1038/s41467-017-02403-5>
- 1240 Li, H., Handsaker, B., Wysoker, A., Fennell, T., Ruan, J., Homer, N., Marth, G., Abecasis, G., Durbin, R., & 1000  
1241 Genome Project Data Processing Subgroup. (2009). The Sequence Alignment/Map format and SAMtools.  
1242 *Bioinformatics*, 25(16), 2078–2079. <https://doi.org/10.1093/bioinformatics/btp352>
- 1243 Love, M. I., Huber, W., & Anders, S. (2014). Moderated estimation of fold change and dispersion for RNA-seq  
1244 data with DESeq2. *Genome Biology*, 15(12), 550. <https://doi.org/10.1186/s13059-014-0550-8>
- 1245 Lovén, J., Hoke, H. A., Lin, C. Y., Lau, A., Orlando, D. A., Vakoc, C. R., Bradner, J. E., Lee, T. I., & Young, R. A.  
1246 (2013). Selective inhibition of tumor oncogenes by disruption of super-enhancers. *Cell*, 153(2), 320–334.  
1247 <https://doi.org/10.1016/j.cell.2013.03.036>
- 1248 Luger, K., Dechassa, M. L., & Tremethick, D. J. (2012). New insights into nucleosome and chromatin structure:  
1249 an ordered state or a disordered affair? *Nature Reviews Molecular Cell Biology*, 13(7), 436–447.  
1250 <https://doi.org/10.1038/nrm3382>
- 1251 Marjanović, M. P., Hurtado-bagès, S., Lassi, M., Valero, V., Malinverni, R., Delage, H., Navarro, M., Corujo, D.,  
1252 Douet, J., Gama-perez, P., Garcia-roves, P. M., Ahel, I., Ladurner, G., Yanes, O., Bouvet, P., & Suelves, M.  
1253 (2018). *MacroH2A1 . 1 regulates mitochondrial respiration by limiting nuclear NAD + consumption*.  
1254 24(11), 902–910. <https://doi.org/10.1038/nsmb.3481>.MacroH2A1.1
- 1255 Mei, Z., Chen, S., Chen, C., Xiao, B., Li, F., Wang, Y., & Tao, Z. (2015). Interleukin-23 Facilitates Thyroid Cancer  
1256 Cell Migration and Invasion by Inhibiting SOCS4 Expression via MicroRNA-25. *PLOS ONE*, 10(10),

- 1257 e0139456. <https://doi.org/10.1371/journal.pone.0139456>
- 1258 Mifsud, B., Tavares-Cadete, F., Young, A. N., Sugar, R., Schoenfelder, S., Ferreira, L., Wingett, S. W., Andrews, S.,  
1259 Grey, W., Ewels, P. A., Herman, B., Happe, S., Higgs, A., Leproust, E., Follows, G. A., Fraser, P., Luscombe,  
1260 N. M., & Osborne, C. S. (2015). Mapping long-range promoter contacts in human cells with high-  
1261 resolution capture Hi-C. *Nature Genetics*, 47(6), 598–606. <https://doi.org/10.1038/ng.3286>
- 1262 Nalabothula, N., Al-Jumaily, T., Eteleeb, A. M., Flight, R. M., Xiaorong, S., Moseley, H., Rouchka, E. C., &  
1263 Fondufe-Mittendorf, Y. N. (2015). Genome-wide profiling of PARP1 reveals an interplay with gene  
1264 regulatory regions and DNA methylation. *PLoS ONE*, 10(8).  
1265 <https://doi.org/10.1371/journal.pone.0135410>
- 1266 Novikov, L., Park, J. W., Chen, H., Klerman, H., Jalloh, A. S., & Gamble, M. J. (2011). QKI-mediated alternative  
1267 splicing of the histone variant MacroH2A1 regulates cancer cell proliferation. *Molecular and Cellular  
1268 Biology*, 31(20), 4244–4255. <https://doi.org/10.1128/MCB.05244-11>
- 1269 Ouarrhni, K., Hadj-Slimane, R., Ait-Si-Ali, S., Robin, P., Mietton, F., Harel-Bellan, A., Dimitrov, S., & Hamiche, A.  
1270 (2006). The histone variant mH2A1.1 interferes with transcription by down-regulating PARP-1 enzymatic  
1271 activity. *Genes & Development*, 20(23), 3324–3336. <https://doi.org/10.1101/gad.396106>
- 1272 Pehrson, J. R., & Fuji, R. N. (1998). Evolutionary conservation of histone macroH2A subtypes and domains.  
1273 *Nucleic Acids Research*, 26(12), 2837–2842. <https://doi.org/10.1093/nar/26.12.2837>
- 1274 Pinzaglia, M., Montaldo, C., Polinari, D., Simone, M., La Teana, A., Tripodi, M., Mancone, C., Londei, P., &  
1275 Benelli, D. (2015). eIF6 over-expression increases the motility and invasiveness of cancer cells by  
1276 modulating the expression of a critical subset of membrane-bound proteins. *BMC Cancer*, 15(1), 131.  
1277 <https://doi.org/10.1186/s12885-015-1106-3>
- 1278 Pliatska, M., Kapasa, M., Kokkalis, A., Polyzos, A., & Thanos, D. (2018). The Histone Variant MacroH2A Blocks  
1279 Cellular Reprogramming by Inhibiting Mesenchymal-to-Epithelial Transition. *Molecular and Cellular  
1280 Biology*, 38(10), e00669-17. <https://doi.org/10.1128/MCB.00669-17>
- 1281 Podrini, C., Koffas, A., Chokshi, S., Vinciguerra, M., Lelliott, C. J., White, J. K., Adissu, H. A., Williams, R., & Greco,  
1282 A. (2015). MacroH2A1 isoforms are associated with epigenetic markers for activation of lipogenic genes  
1283 in fat-induced steatosis. *FASEB Journal : Official Publication of the Federation of American Societies for  
1284 Experimental Biology*, 29(5), 1676–1687. <https://doi.org/10.1096/fj.14-262717>
- 1285 Posavec Marjanović, M., Hurtado-Bagès, S., Lassi, M., Valero, V., Malinverni, R., Delage, H., Navarro, M., Corujo,  
1286 D., Guberovic, I., Douet, J., Gama-Perez, P., Garcia-Roves, P. M., Ahel, I., Ladurner, A. G., Yanes, O.,  
1287 Bouvet, P., Suelves, M., Teperino, R., Pospisilik, J. A., & Buschbeck, M. (2017). MacroH2A1.1 regulates  
1288 mitochondrial respiration by limiting nuclear NAD<sup>+</sup> consumption. *Nature Structural & Molecular Biology*,  
1289 24(11), 902–910. <https://doi.org/10.1038/nsmb.3481>
- 1290 Ram, F., Ryan, D. P., Bhardwaj, V., Kilpert, F., Richter, A. S., Heyne, S., Friederike, D., & Manke, T. (2016).  
1291 *deepTools2 : a next generation web server for deep-sequencing data analysis*. 44(April), 160–165.  
1292 <https://doi.org/10.1093/nar/gkw257>
- 1293 Rao, X., Huang, X., Zhou, Z., & Lin, X. (2013). An improvement of the 2<sup>-ΔΔCT</sup> method for quantitative  
1294 real-time polymerase chain reaction data analysis. *Biostatistics, Bioinformatics and Biomathematics*, 3(3),  
1295 71–85. <http://www.ncbi.nlm.nih.gov/pubmed/25558171>
- 1296 Ray Chaudhuri, A., & Nussenzweig, A. (2017). The multifaceted roles of PARP1 in DNA repair and chromatin  
1297 remodelling. *Nature Reviews Molecular Cell Biology*, 18(10), 610–621.  
1298 <https://doi.org/10.1038/nrm.2017.53>
- 1299 Ritchie, M. E., Phipson, B., Wu, D., Hu, Y., Law, C. W., Shi, W., & Smyth, G. K. (2015). Limma powers differential  
1300 expression analyses for RNA-sequencing and microarray studies. *Nucleic Acids Research*, 43(7), e47.  
1301 <https://doi.org/10.1093/nar/gkv007>
- 1302 Rivera-Casas, C., Gonzalez-Romero, R., Cheema, M. S., Ausió, J., & Eirín-López, J. M. (2016). The  
1303 characterization of macroH2A beyond vertebrates supports an ancestral origin and conserved role for  
1304 histone variants in chromatin. *Epigenetics*, 11(6), 415–425.  
1305 <https://doi.org/10.1080/15592294.2016.1172161>
- 1306 Ryu, H.-H., Jung, S., Jung, T.-Y., Moon, K.-S., Kim, I.-Y., Jeong, Y.-I., Jin, S.-G., Pei, J., Wen, M., & Jang, W.-Y.  
1307 (2012). Role of metallothionein 1E in the migration and invasion of human glioma cell lines. *International  
1308 Journal of Oncology*, 41(4), 1305–1313. <https://doi.org/10.3892/ijo.2012.1570>
- 1309 Sabari, B. R., Dall’Agnese, A., Boija, A., Klein, I. A., Coffey, E. L., Shrinivas, K., Abraham, B. J., Hannett, N. M.,  
1310 Zamudio, A. V., Manteiga, J. C., Li, C. H., Guo, Y. E., Day, D. S., Schuijers, J., Vasile, E., Malik, S., Hnisz, D.,  
1311 Lee, T. I., Cisse, I. I., ... Young, R. A. (2018). Coactivator condensation at super-enhancers links phase  
1312 separation and gene control. *Science*, 361(6400), eaar3958. <https://doi.org/10.1126/science.aar3958>
- 1313 Schoenfelder, S., & Fraser, P. (2019). Long-range enhancer–promoter contacts in gene expression control. In

- 1314 *Nature Reviews Genetics* (Vol. 20, Issue 8, pp. 437–455). Nature Research.  
1315 <https://doi.org/10.1038/s41576-019-0128-0>
- 1316 Schoenfelder, S., Javierre, B. M., Furlan-Magaril, M., Wingett, S. W., & Fraser, P. (2018). Promoter capture Hi-C:  
1317 High-resolution, genome-wide profiling of promoter interactions. *Journal of Visualized Experiments*,  
1318 2018(136). <https://doi.org/10.3791/57320>
- 1319 Segal, T., Salmon-Divon, M., & Gerlitz, G. (2018). The Heterochromatin Landscape in Migrating Cells and the  
1320 Importance of H3K27me3 for Associated Transcriptome Alterations. *Cells*, 7(11), 205.  
1321 <https://doi.org/10.3390/cells7110205>
- 1322 Selvaraj, N., Budka, J. A., Ferris, M. W., Plotnik, J. P., & Hollenhorst, P. C. (2015). Extracellular Signal-Regulated  
1323 Kinase Signaling Regulates the Opposing Roles of JUN Family Transcription Factors at ETS/AP-1 Sites and  
1324 in Cell Migration. *Molecular and Cellular Biology*, 35(1), 88–100. <https://doi.org/10.1128/mcb.00982-14>
- 1325 Sporn, J C, Kustatscher, G., Hothorn, T., Collado, M., Serrano, M., Muley, T., Schnabel, P., & Ladurner, A. G.  
1326 (2009). Histone macroH2A isoforms predict the risk of lung cancer recurrence. *Oncogene*, 28(38), 3423–  
1327 3428. <https://doi.org/10.1038/onc.2009.26>
- 1328 Sporn, Judith C, & Jung, B. (2012). Differential regulation and predictive potential of MacroH2A1 isoforms in  
1329 colon cancer. *The American Journal of Pathology*, 180(6), 2516–2526.  
1330 <https://doi.org/10.1016/j.ajpath.2012.02.027>
- 1331 Stankiewicz, E., Mao, X., Mangham, D. C., Xu, L., Yeste-Velasco, M., Fisher, G., North, B., Chaplin, T., Young, B.,  
1332 Wang, Y., Kaur Bansal, J., Kudahetti, S., Spencer, L., Foster, C. S., Møller, H., Scardino, P., Oliver, R. T.,  
1333 Shamash, J., Cuzick, J., ... Lu, Y.-J. (2017). Identification of FBXL4 as a Metastasis Associated Gene in  
1334 Prostate Cancer. *Scientific Reports*, 7(1), 5124. <https://doi.org/10.1038/s41598-017-05209-z>
- 1335 Stempor, P., & Ahringer, J. (2016). SeqPlots - Interactive software for exploratory data analyses, pattern  
1336 discovery and visualization in genomics. *Wellcome Open Research*, 1.  
1337 <https://doi.org/10.12688/wellcomeopenres.10004.1>
- 1338 Sun, Z., Filipescu, D., Andrade, J., Gaspar-Maia, A., Ueberheide, B., & Bernstein, E. (2018). Transcription-  
1339 associated histone pruning demarcates macroH2A chromatin domains. *Nature Structural & Molecular*  
1340 *Biology*, 25(10), 958–970. <https://doi.org/10.1038/s41594-018-0134-5>
- 1341 Teves, S. S., & Henikoff, S. (2014). Transcription-generated torsional stress destabilizes nucleosomes. *Nature*  
1342 *Structural and Molecular Biology*, 21(1), 88–94. <https://doi.org/10.1038/nsmb.2723>
- 1343 Thorvaldsdóttir, H., Robinson, J. T., & Mesirov, J. P. (2013). Integrative Genomics Viewer (IGV): High-  
1344 performance genomics data visualization and exploration. *Briefings in Bioinformatics*, 14(2), 178–192.  
1345 <https://doi.org/10.1093/bib/bbs017>
- 1346 Tolza, C., Bejjani, F., Evanno, E., Mahfoud, S., Moquet-Torcy, G., Gostan, T., Maqbool, M. A., Kirsh, O.,  
1347 Piechaczyk, M., & Jariel-Encontre, I. (2019). AP-1 Signaling by Fra-1 Directly Regulates HMGA1 Oncogene  
1348 Transcription in Triple-Negative Breast Cancers. *Molecular Cancer Research : MCR*, 17(10), 1999–2014.  
1349 <https://doi.org/10.1158/1541-7786.MCR-19-0036>
- 1350 Venkatesh, S., & Workman, J. L. (2015). Histone exchange, chromatin structure and the regulation of  
1351 transcription. *Nature Reviews Molecular Cell Biology*, 16(3), 178–189. <https://doi.org/10.1038/nrm3941>
- 1352 Wan, D., Liu, C., Sun, Y., Wang, W., Huang, K., & Zheng, L. (2017). MacroH2A1.1 cooperates with EZH2 to  
1353 promote adipogenesis by regulating Wnt signaling. *Journal of Molecular Cell Biology*, 9(4), 325–337.  
1354 <https://doi.org/10.1093/jmcb/mjx027>
- 1355 Whyte, W. A., Orlando, D. A., Hnisz, D., Abraham, B. J., Lin, C. Y., Kagey, M. H., Rahl, P. B., Lee, T. I., & Young, R.  
1356 A. (2013). Master Transcription Factors and Mediator Establish Super-Enhancers at Key Cell Identity  
1357 Genes. *Cell*, 153(2), 307–319. <https://doi.org/10.1016/j.cell.2013.03.035>
- 1358 Wingett, S., Ewels, P., Furlan-Magaril, M., Nagano, T., Schoenfelder, S., Fraser, P., & Andrews, S. (2015). HiCUP:  
1359 Pipeline for mapping and processing Hi-C data. *F1000Research*, 4.  
1360 <https://doi.org/10.12688/f1000research.7334.1>
- 1361 Winter, G. E., Mayer, A., Buckley, D. L., Erb, M. A., Roderick, J. E., Vittori, S., Reyes, J. M., di Iulio, J., Souza, A.,  
1362 Ott, C. J., Roberts, J. M., Zeid, R., Scott, T. G., Paulk, J., Lachance, K., Olson, C. M., Dastjerdi, S., Bauer, S.,  
1363 Lin, C. Y., ... Bradner, J. E. (2017). BET Bromodomain Proteins Function as Master Transcription Elongation  
1364 Factors Independent of CDK9 Recruitment. *Molecular Cell*, 67(1), 5-18.e19.  
1365 <https://doi.org/10.1016/j.molcel.2017.06.004>
- 1366 Xu, C., Xu, Y., Gursoy-Yuzugullu, O., & Price, B. D. (2012). The histone variant macroH2A1.1 is recruited to DSBs  
1367 through a mechanism involving PARP1. *FEBS Letters*, 586(21), 3920–3925.  
1368 <https://doi.org/10.1016/j.febslet.2012.09.030>
- 1369 Yang, P.-C., Liu, Z.-Q., & Mahmood, T. (2014). Western blot: Technique, theory and trouble shooting. *North*  
1370 *American Journal of Medical Sciences*, 6(3), 160. <https://doi.org/10.4103/1947-2714.128482>



- 1371 Yildirim, O., Hung, J.-H., Cedeno, R. J., Weng, Z., Lengner, C. J., & Rando, O. J. (2014). A System for Genome-  
1372 Wide Histone Variant Dynamics In ES Cells Reveals Dynamic MacroH2A2 Replacement at Promoters. *PLoS*  
1373 *Genetics*, *10*(8), e1004515. <https://doi.org/10.1371/journal.pgen.1004515>  
1374 Yokoyama, Y., Hieda, M., Nishioka, Y., Matsumoto, A., Higashi, S., Kimura, H., Yamamoto, H., Mori, M.,  
1375 Matsuura, S., & Matsuura, N. (2013). Cancer-associated upregulation of histone H3 lysine 9  
1376 trimethylation promotes cell motility in vitro and drives tumor formation in vivo. *Cancer Science*, *104*(7),  
1377 889–895. <https://doi.org/10.1111/cas.12166>  
1378 Yu, G., Wang, L.-G., & He, Q.-Y. (2015). CHIPseeker: an R/Bioconductor package for ChIP peak annotation,  
1379 comparison and visualization. *Bioinformatics (Oxford, England)*, *31*(14), 2382–2383.  
1380 <https://doi.org/10.1093/bioinformatics/btv145>  
1381 Zhang, X., Chiang, H.-C., Wang, Y., Zhang, C., Smith, S., Zhao, X., Nair, S. J., Michalek, J., Jatoi, I., Lautner, M.,  
1382 Oliver, B., Wang, H., Petit, A., Soler, T., Brunet, J., Mateo, F., Angel Pujana, M., Poggi, E., Chaldeckas, K., ...  
1383 Li, R. (2017). Attenuation of RNA polymerase II pausing mitigates BRCA1-associated R-loop accumulation  
1384 and tumorigenesis. *Nature Communications*, *8*(1), 15908. <https://doi.org/10.1038/ncomms15908>  
1385 Zhang, Y., Zhang, Y., Chan, H. L., Chan, H. L., Garcia-Martinez, L., Garcia-Martinez, L., Karl, D. L., Weich, N.,  
1386 Weich, N., Slingerland, J. M., Slingerland, J. M., Slingerland, J. M., Slingerland, J. M., Verdun, R. E., Verdun,  
1387 R. E., Morey, L., & Morey, L. (2020). Estrogen induces dynamic ER $\alpha$  and RING1B recruitment to control  
1388 gene and enhancer activities in luminal breast cancer. *Science Advances*, *6*(23).  
1389 <https://doi.org/10.1126/sciadv.aaz7249>

1390





**Fig 2**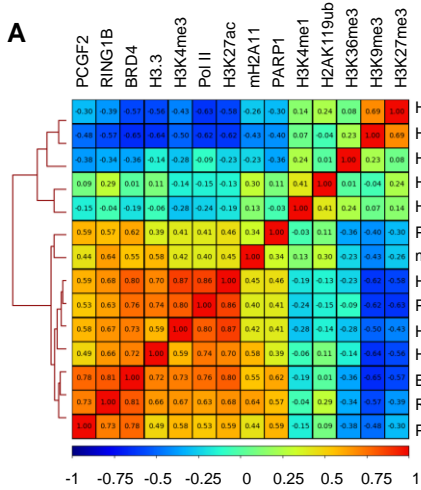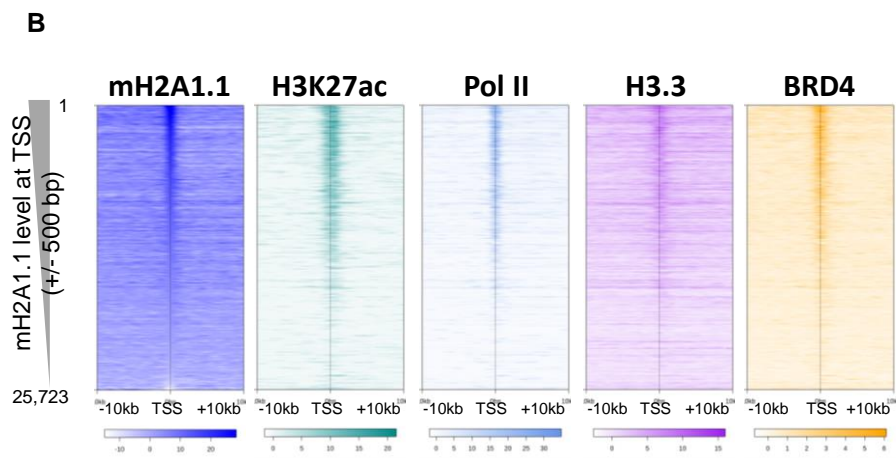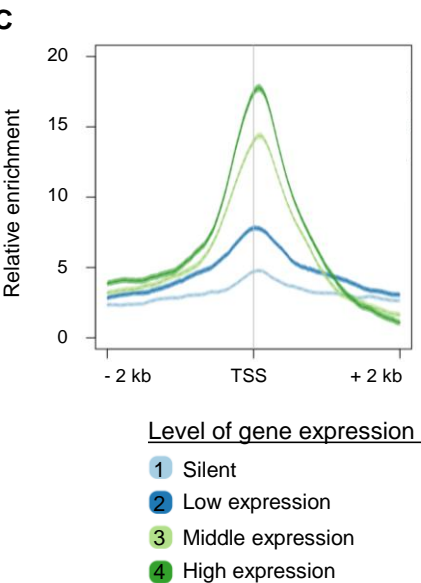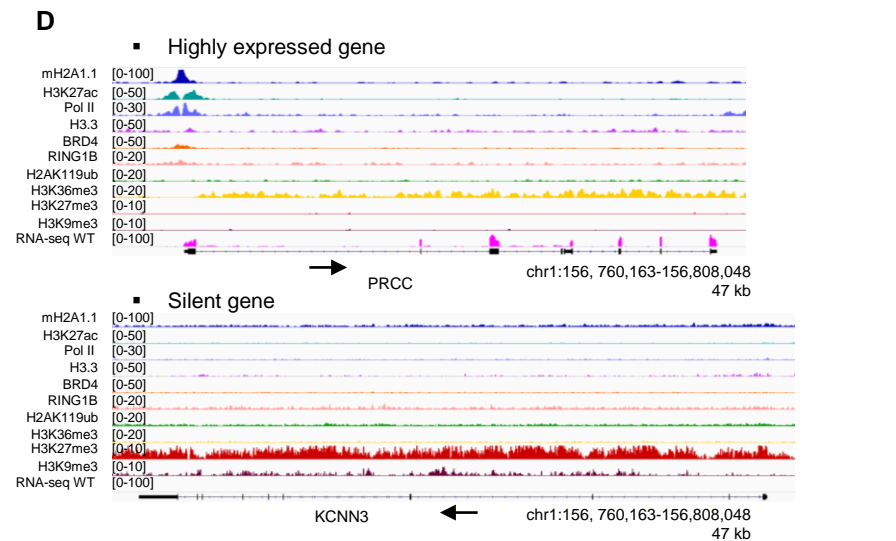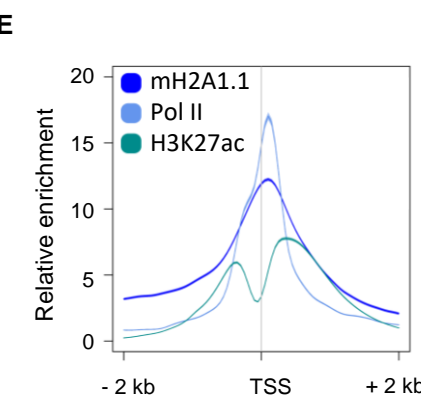

**Fig 3**

**A**

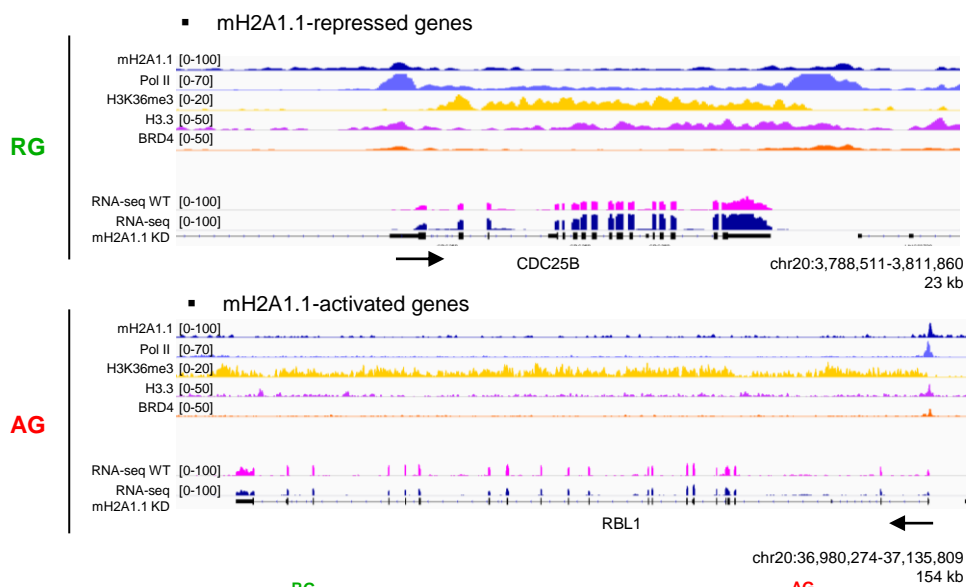

**B**

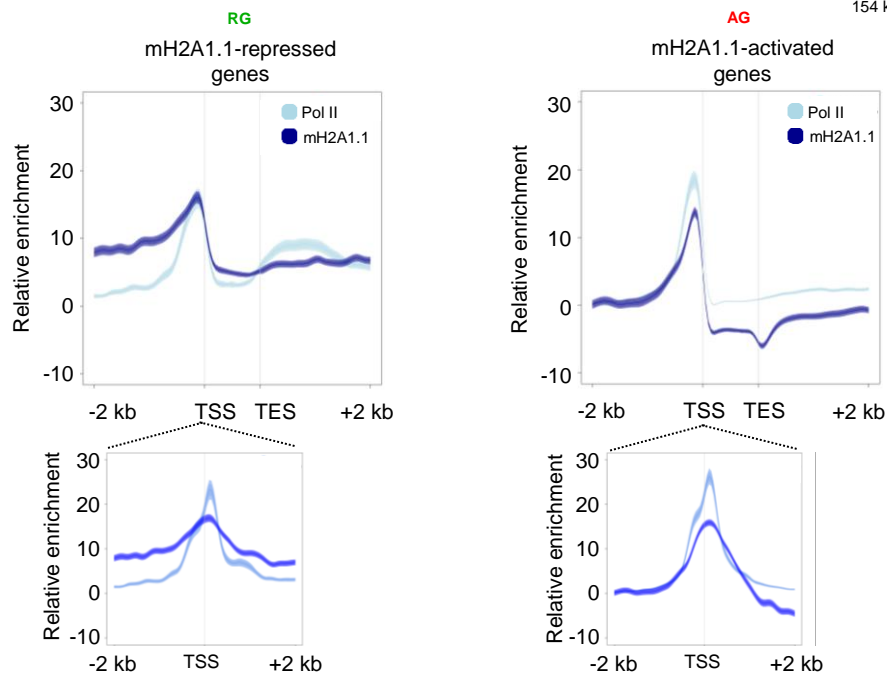

**C**

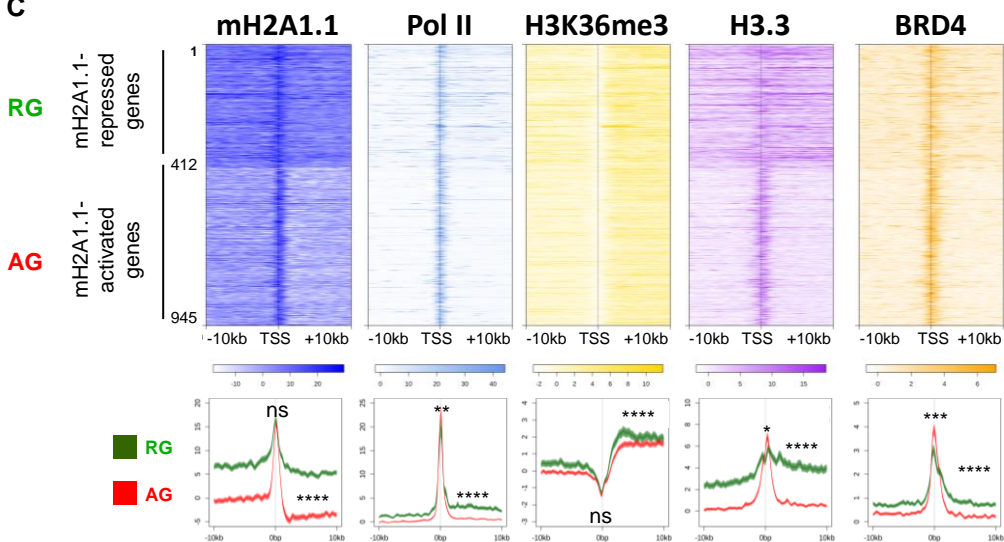

**Fig 4**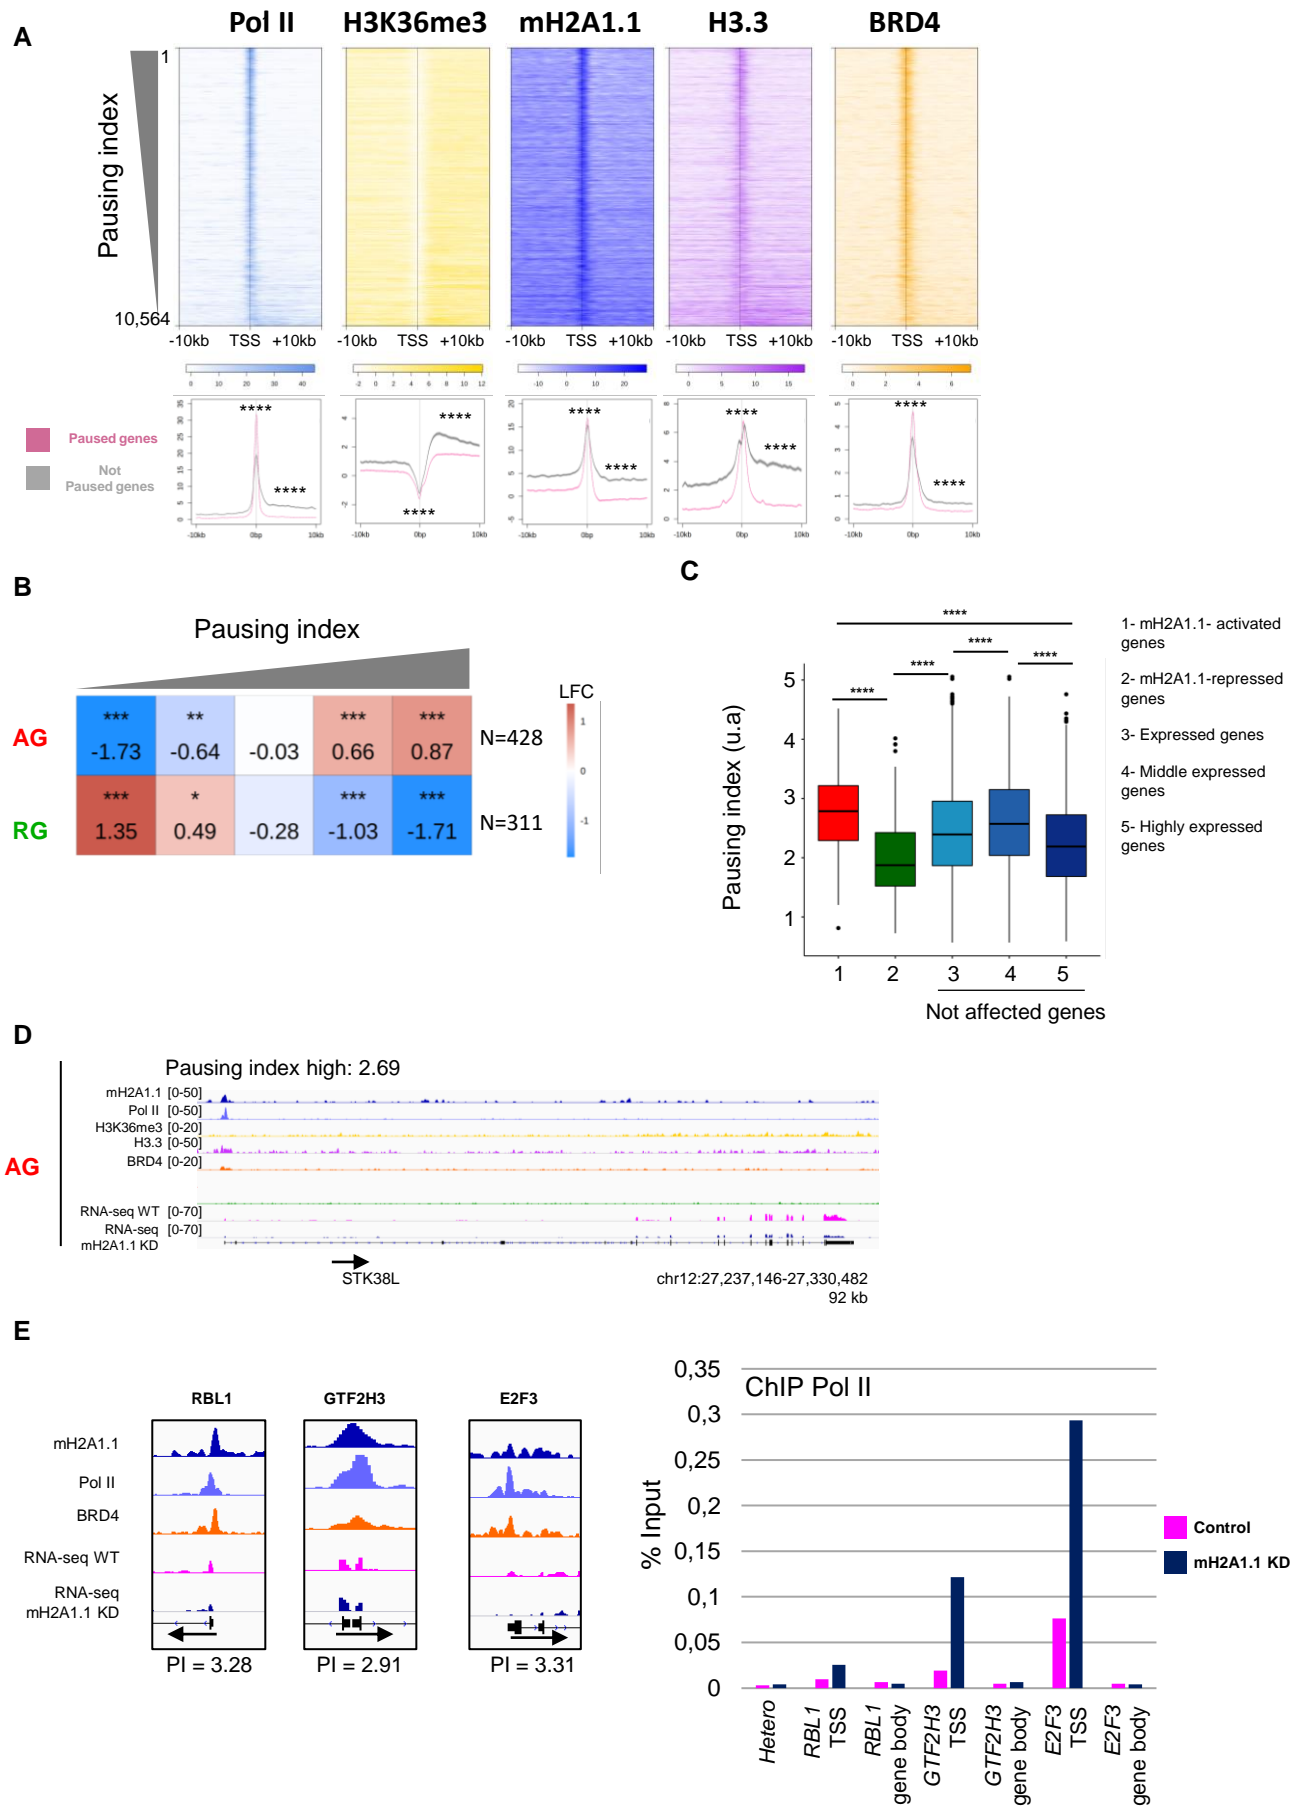

**Fig 5**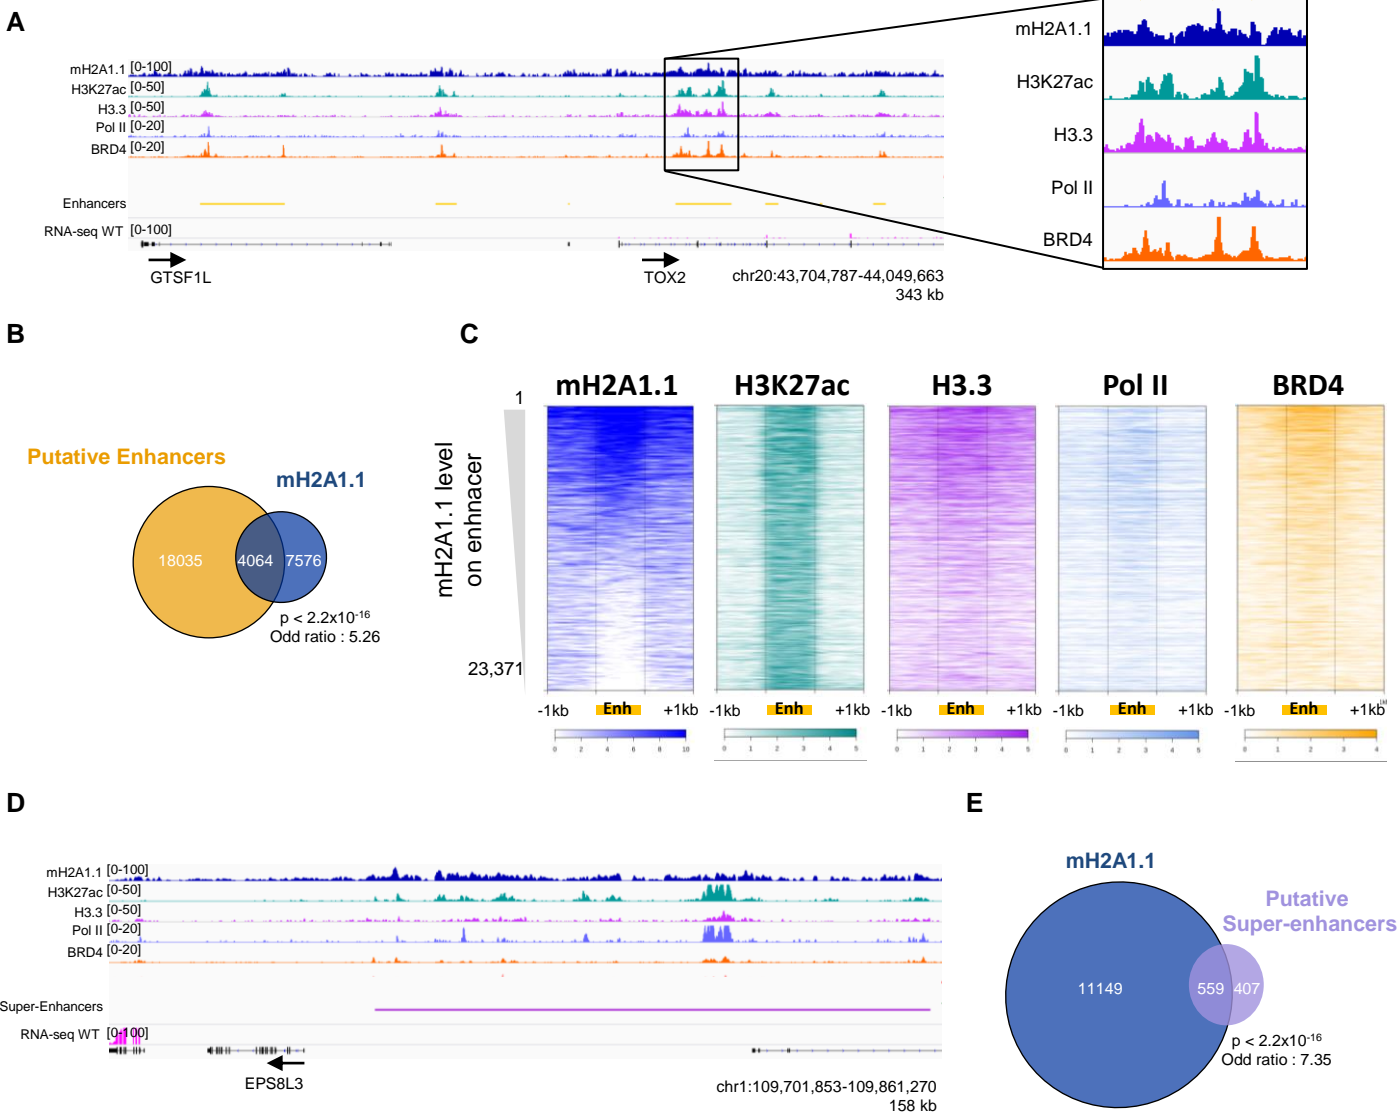



**Fig 6****A**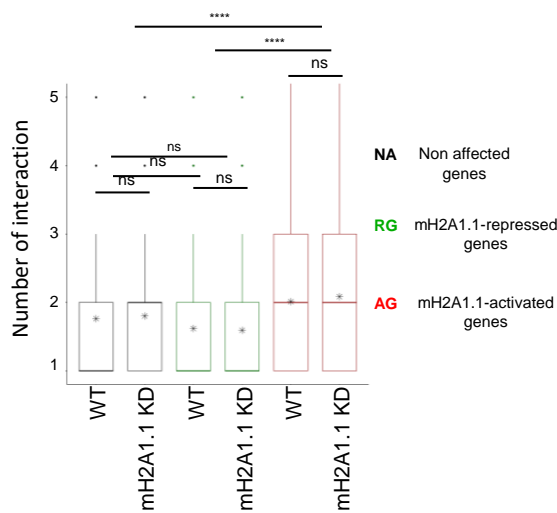**B**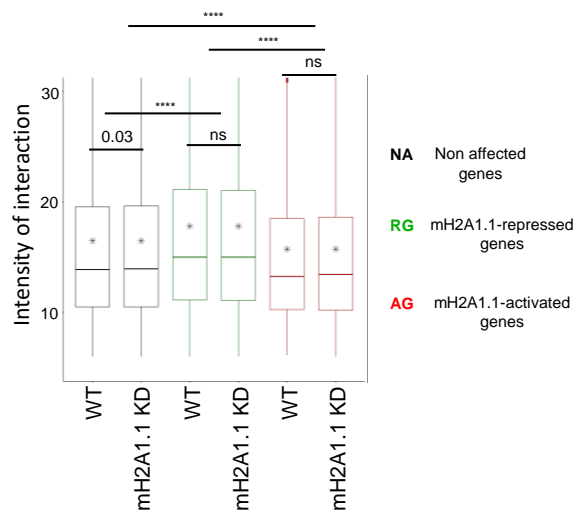**C**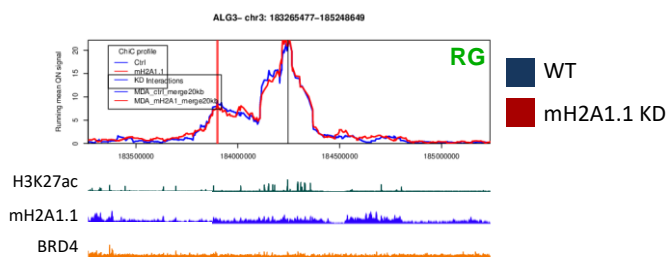**D**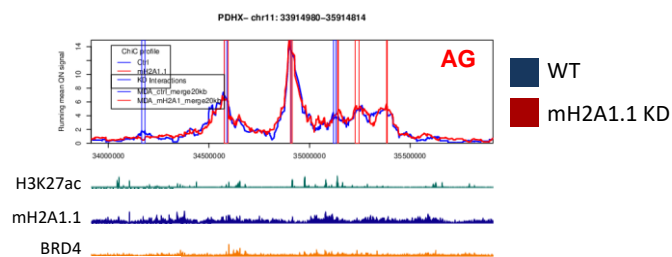**E**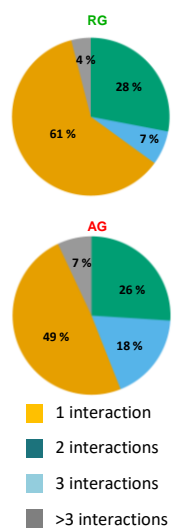**F**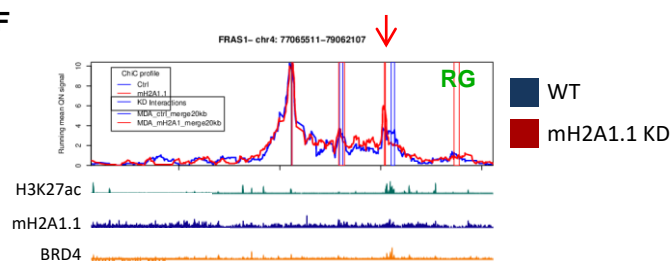**G**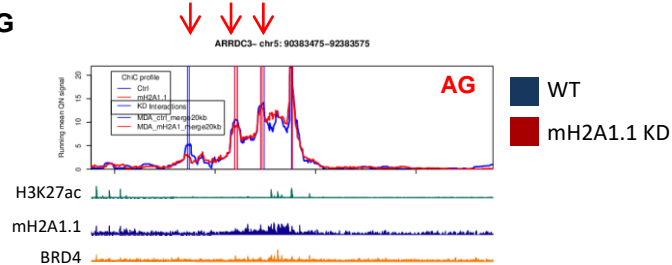**H**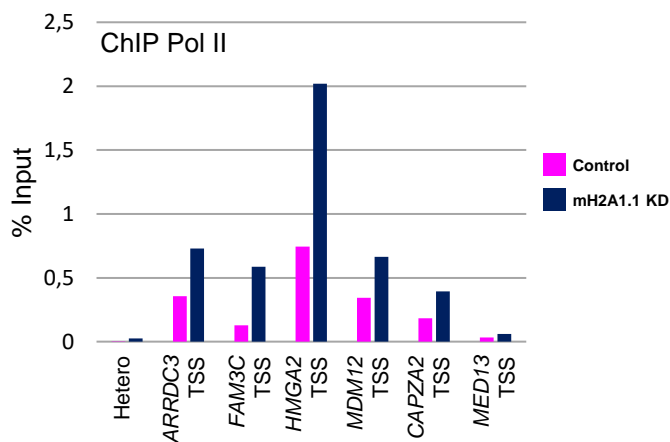

**Fig 7**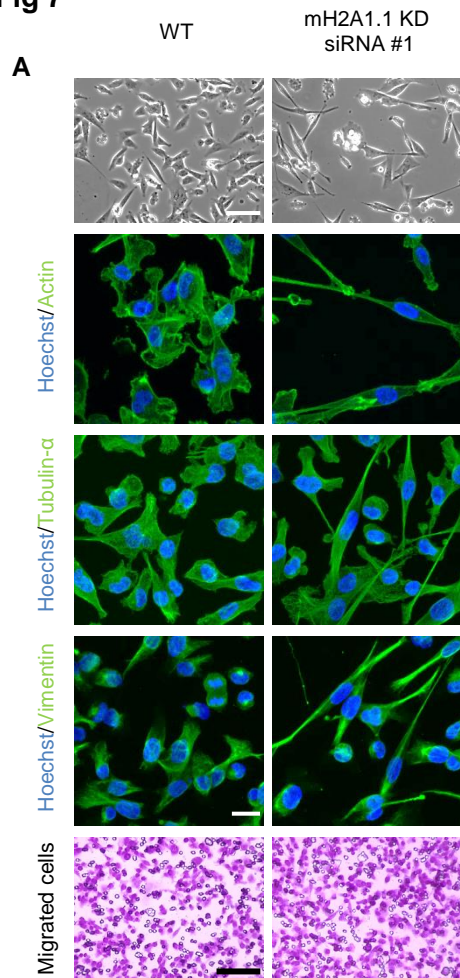**B**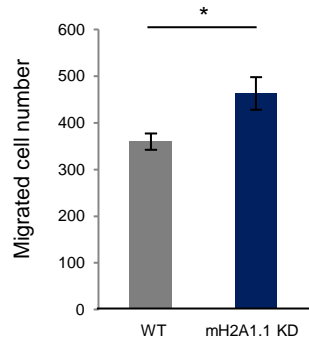**C**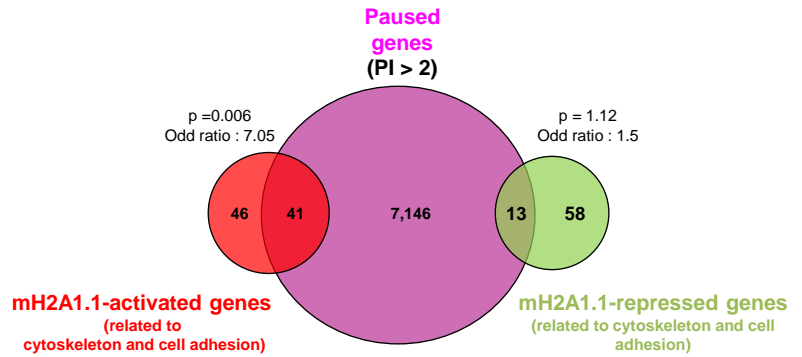**D**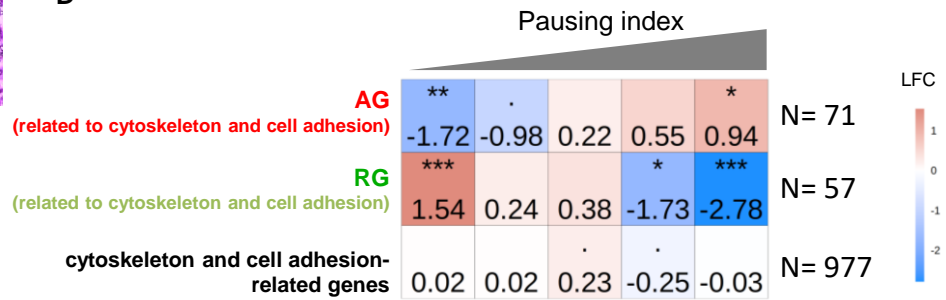**E**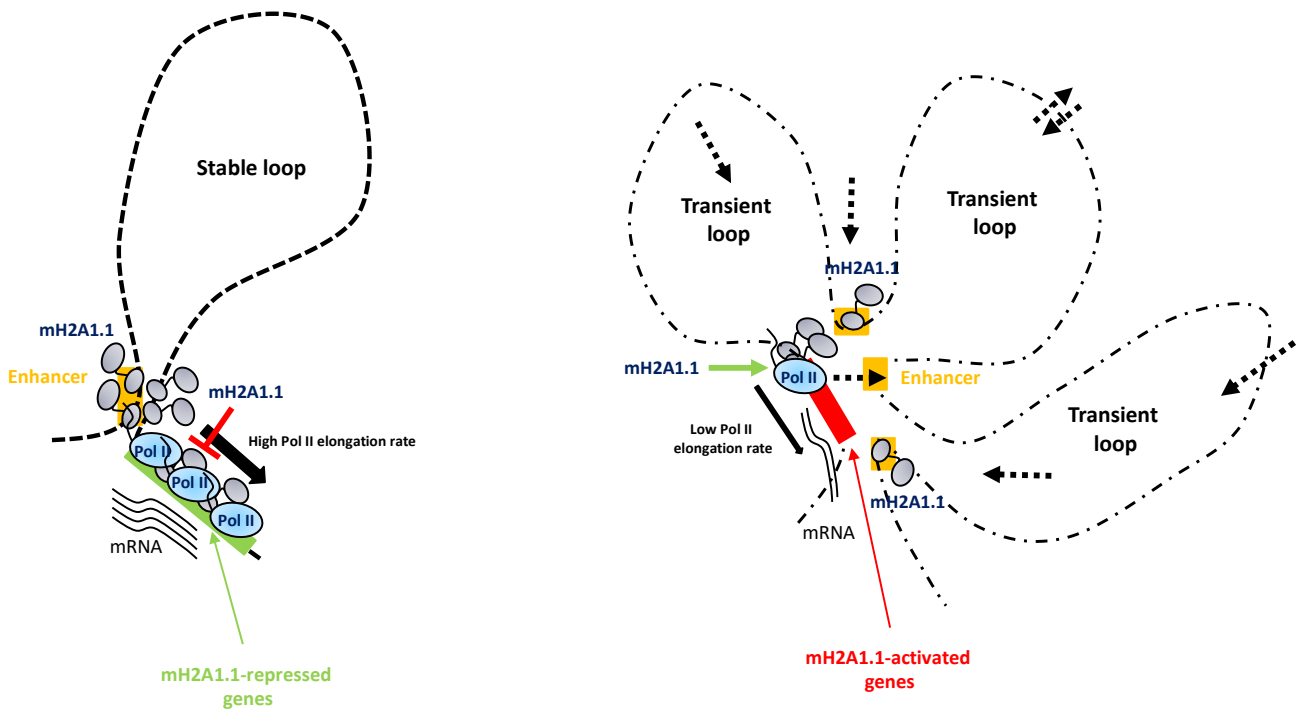

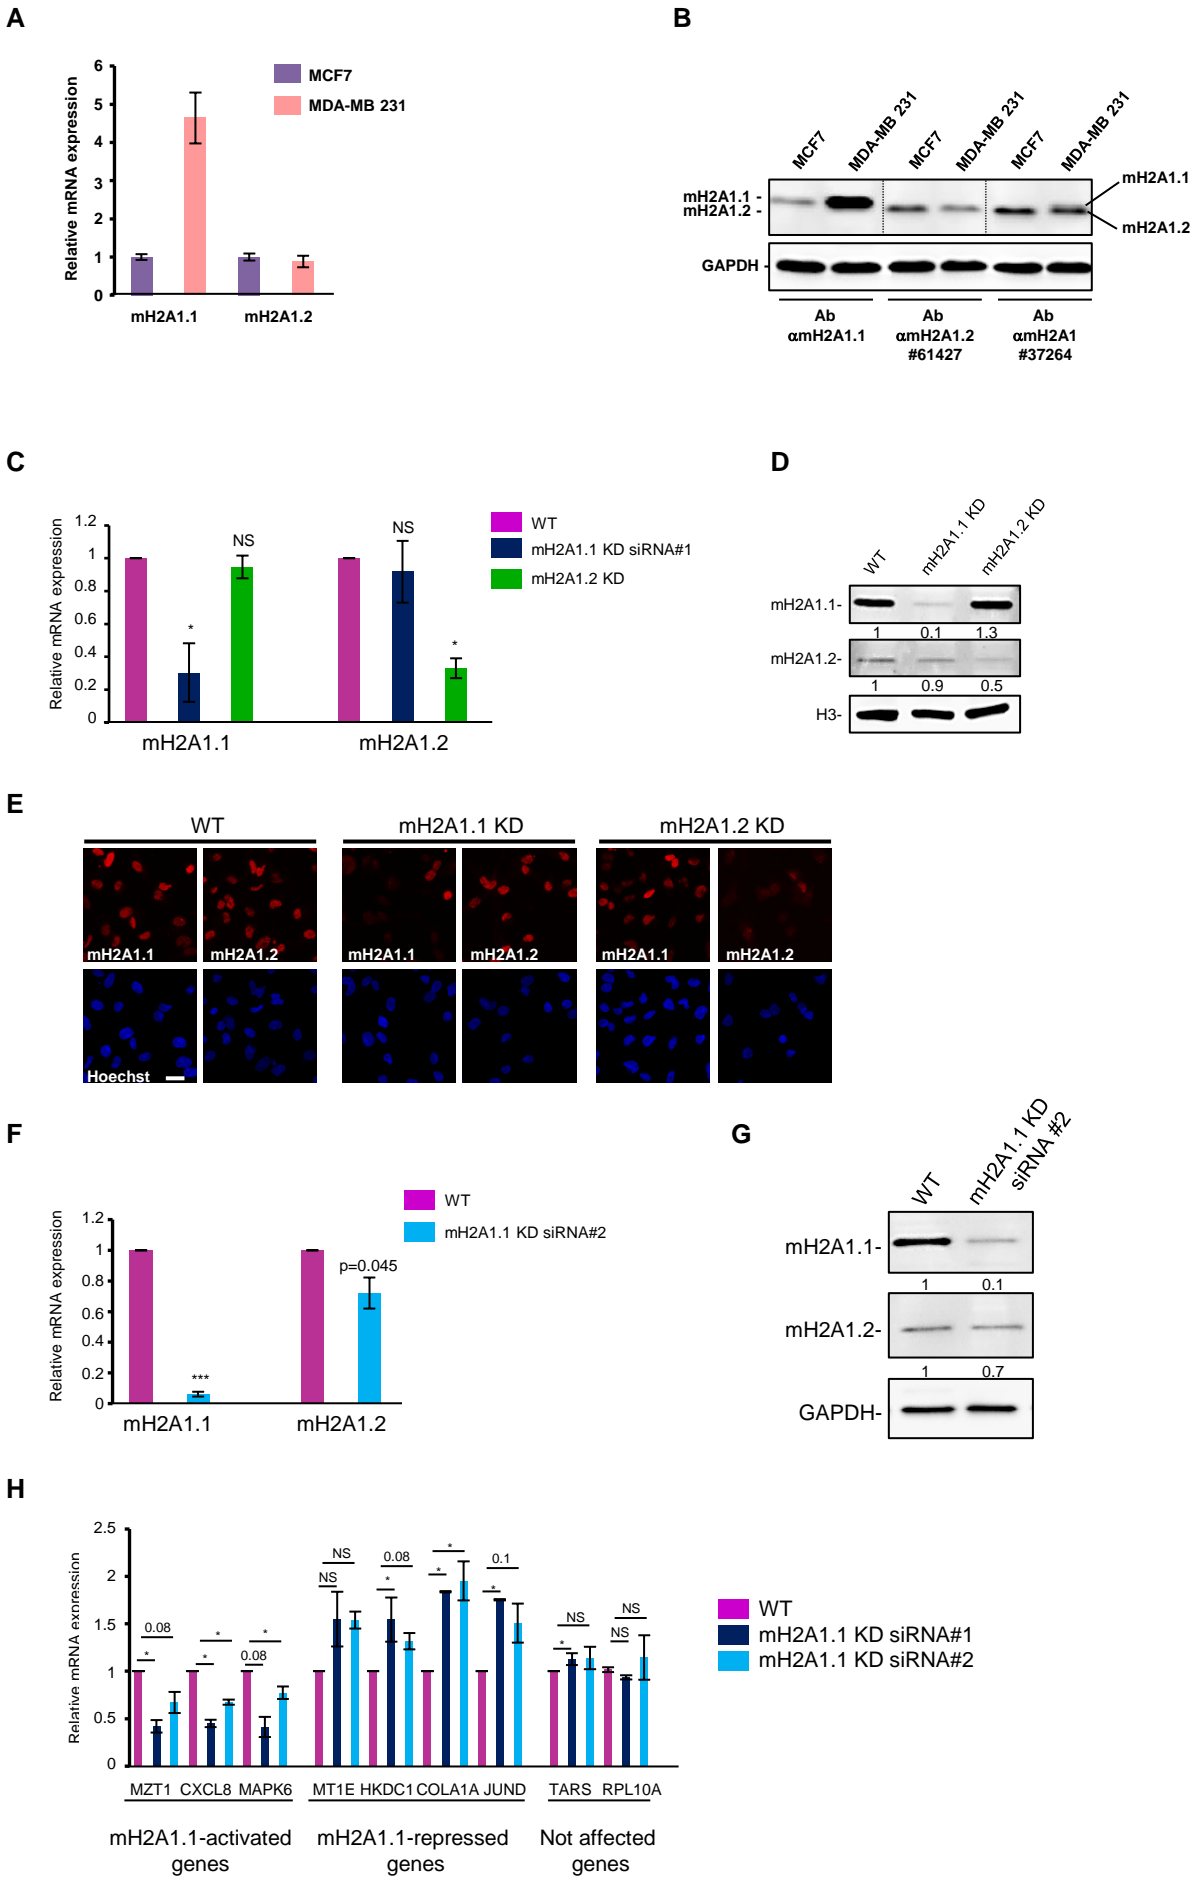

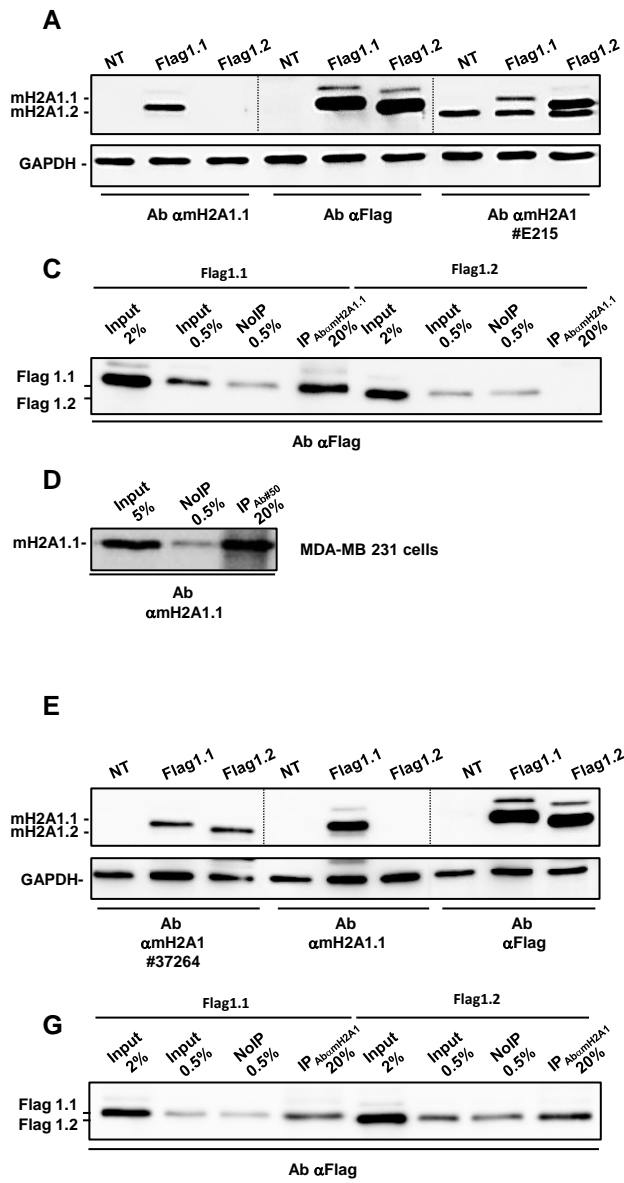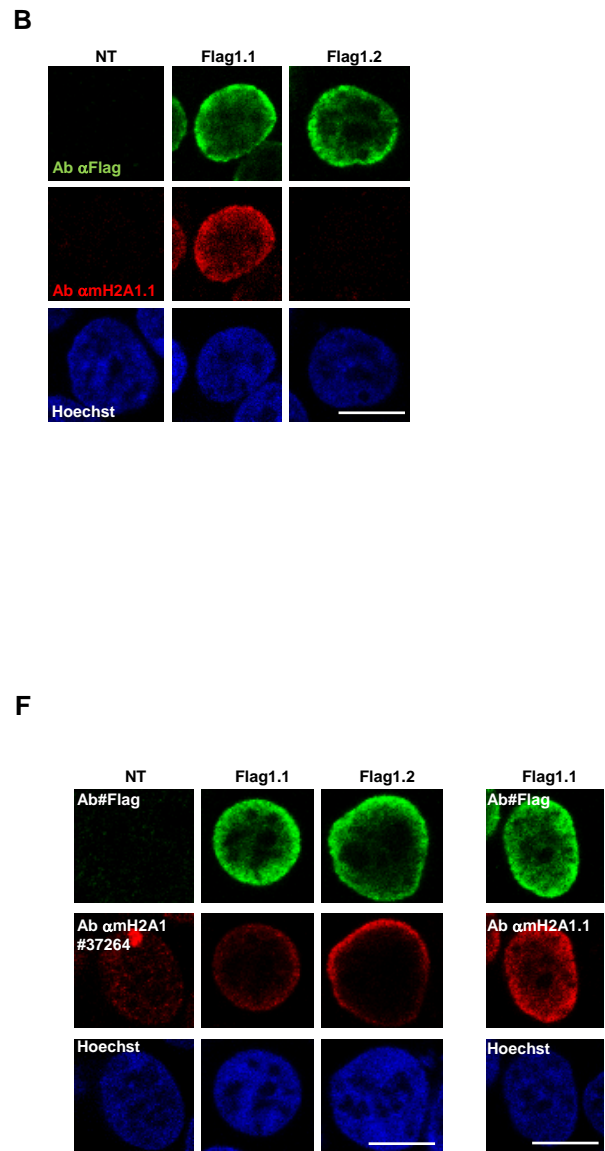

# S3\_Fig

## A

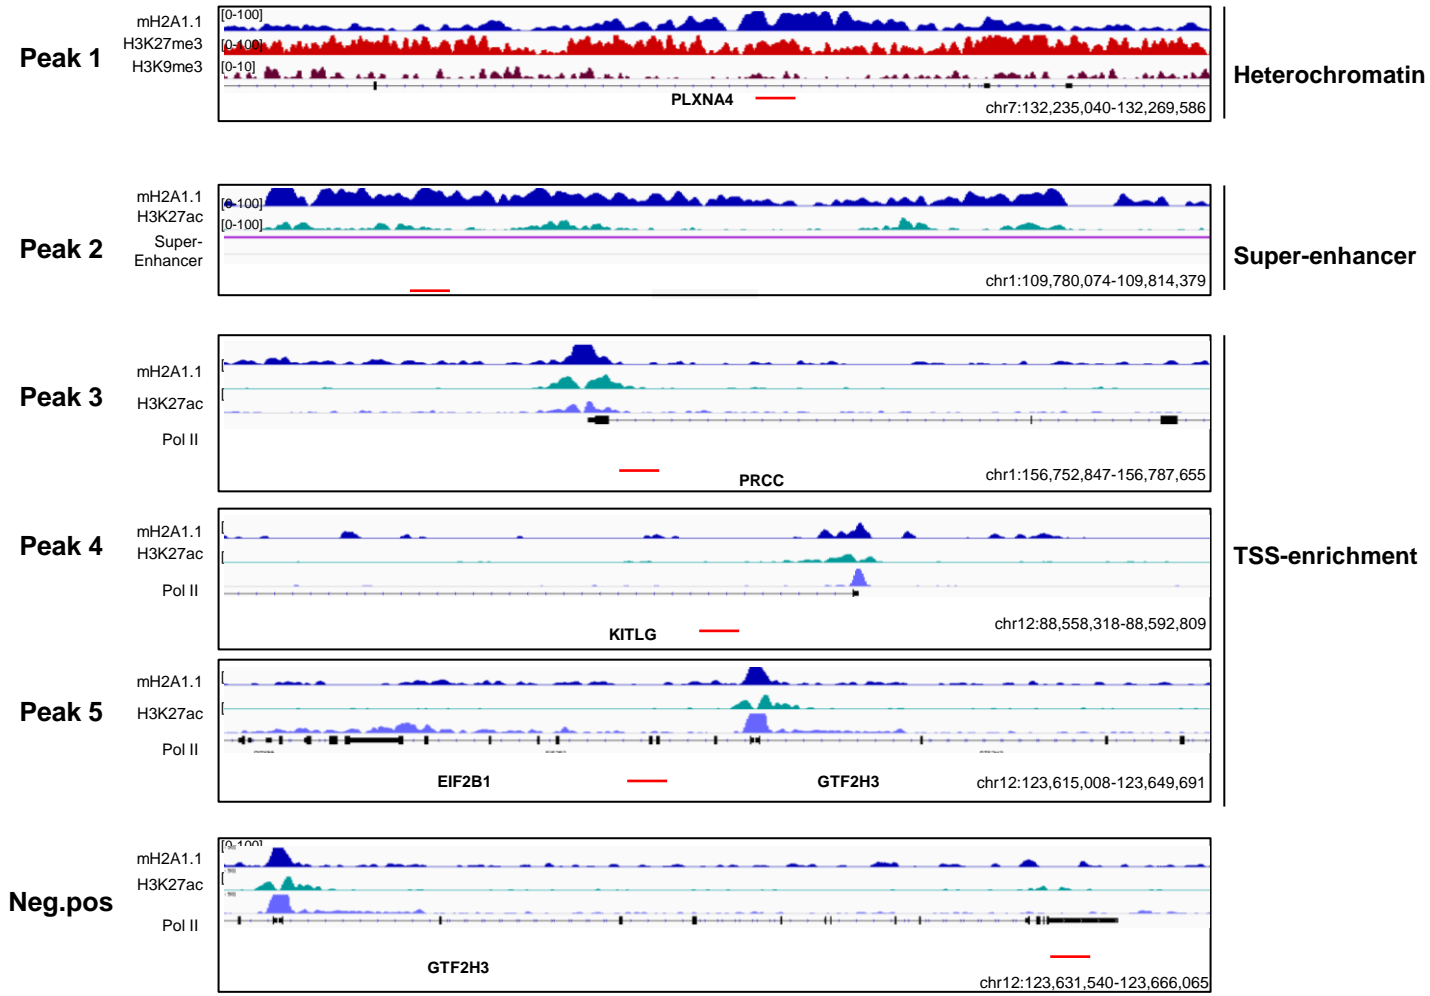

## B

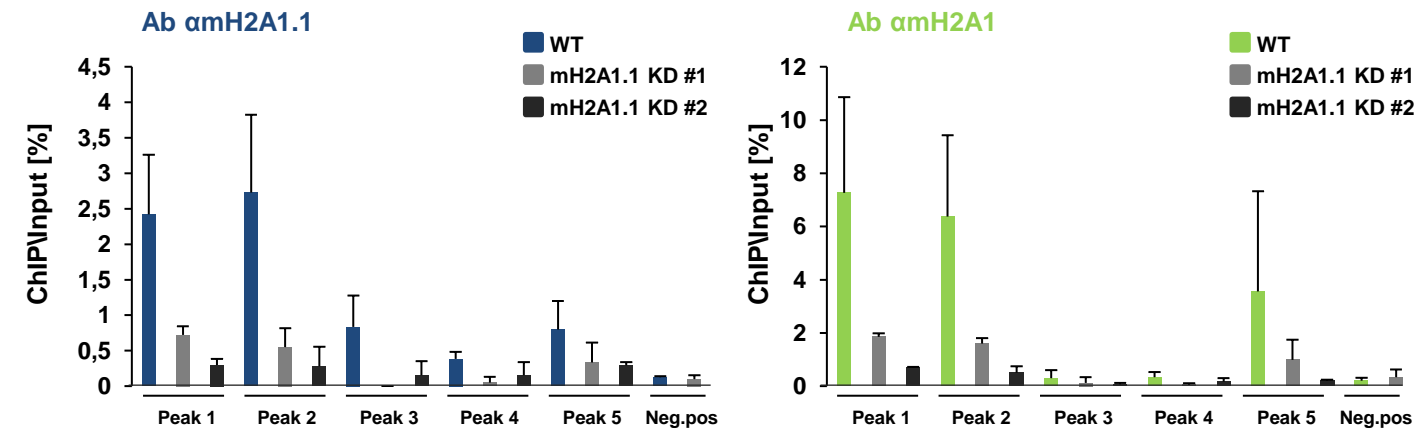



A

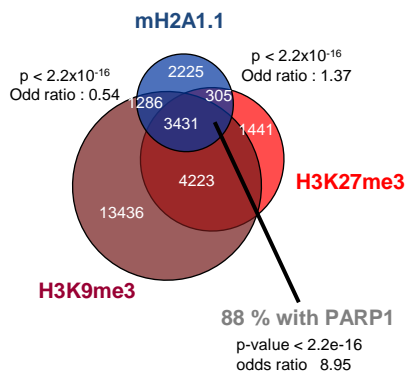

B

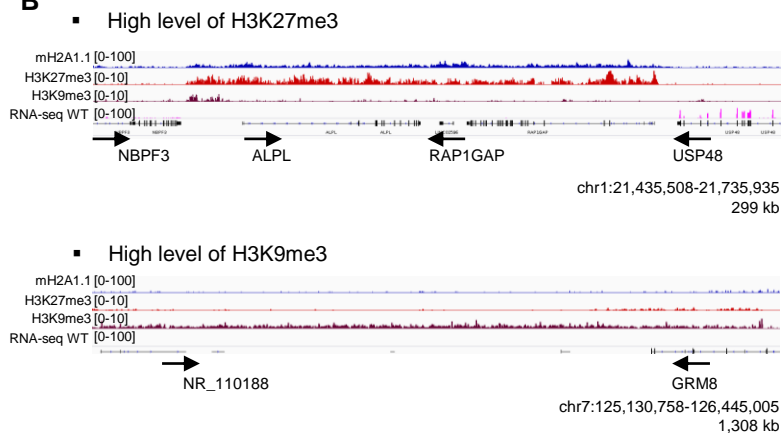

C

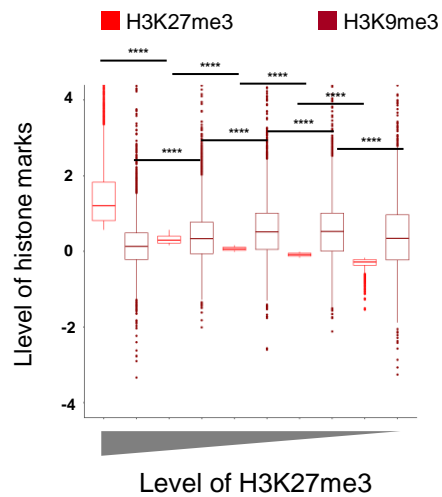

D

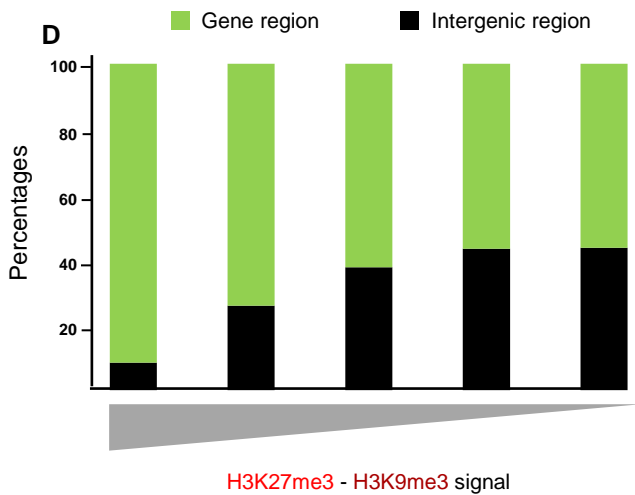

E

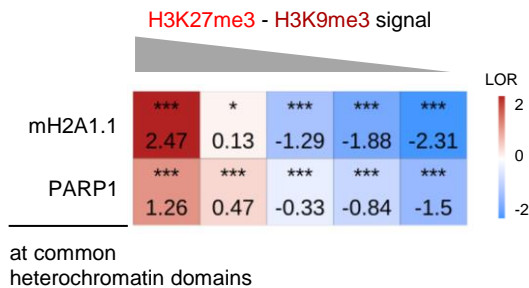

F

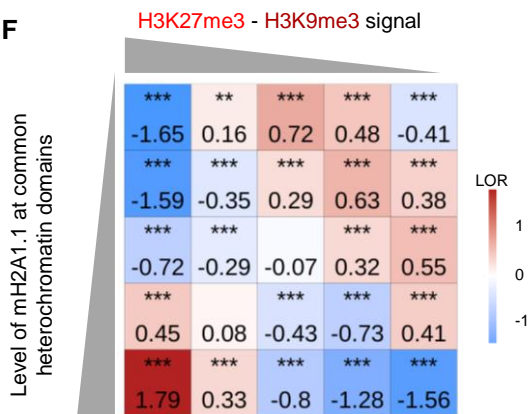

A

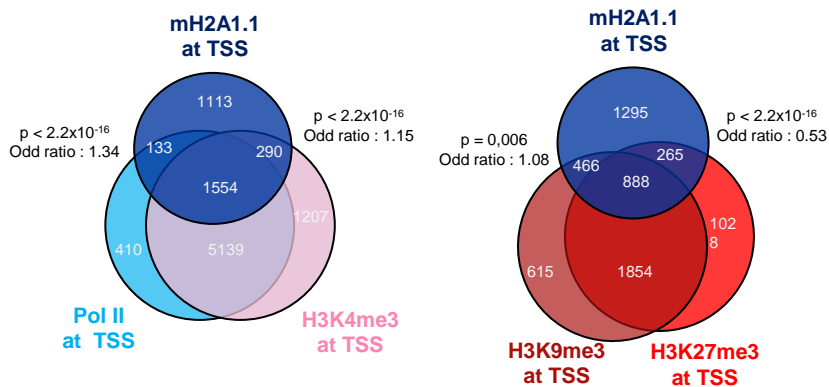

B

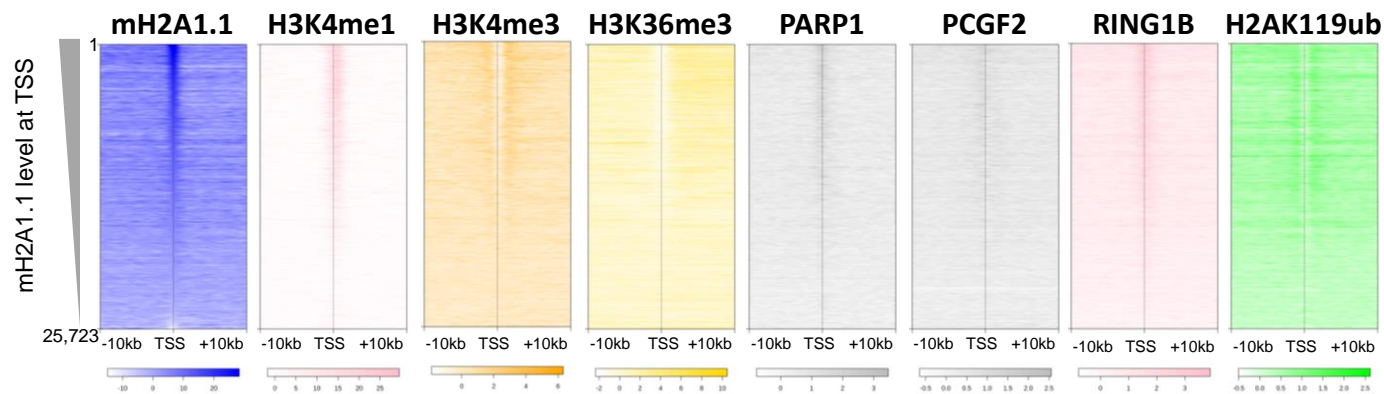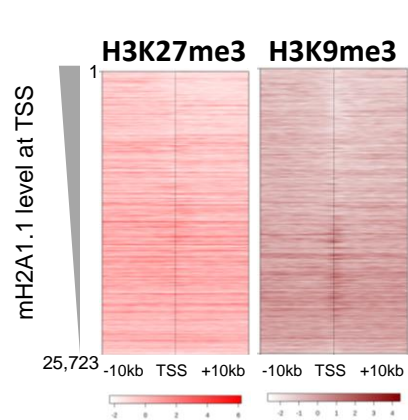

C

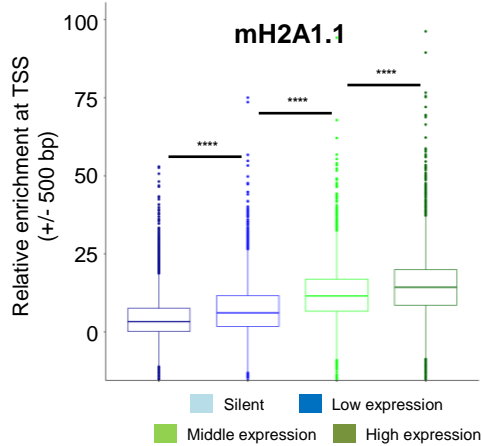

D

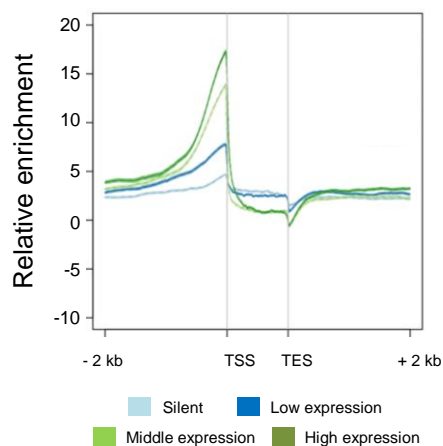

E

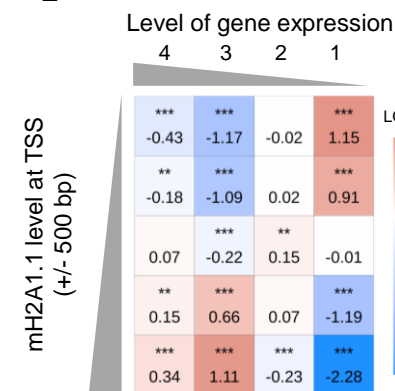

F

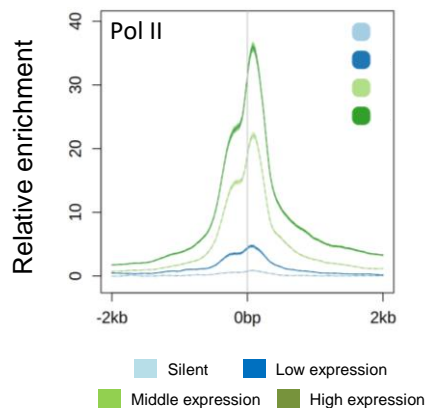

G

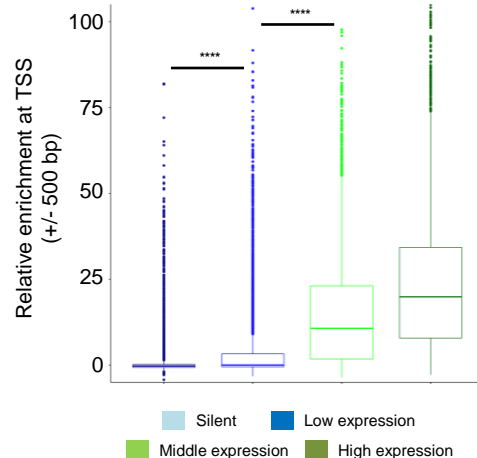

S6\_Fig

A

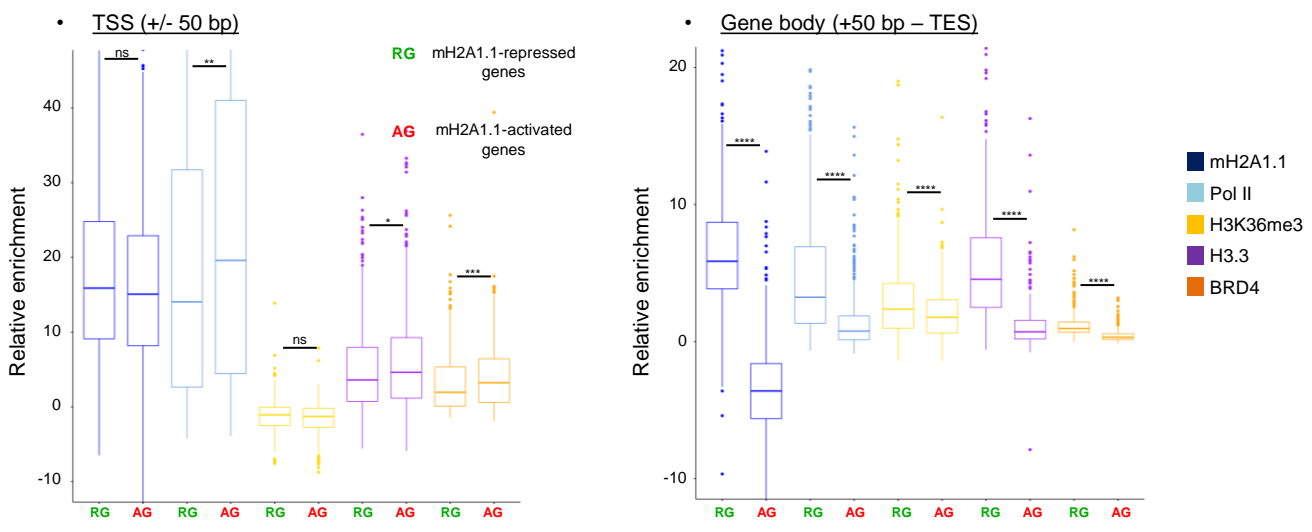

A

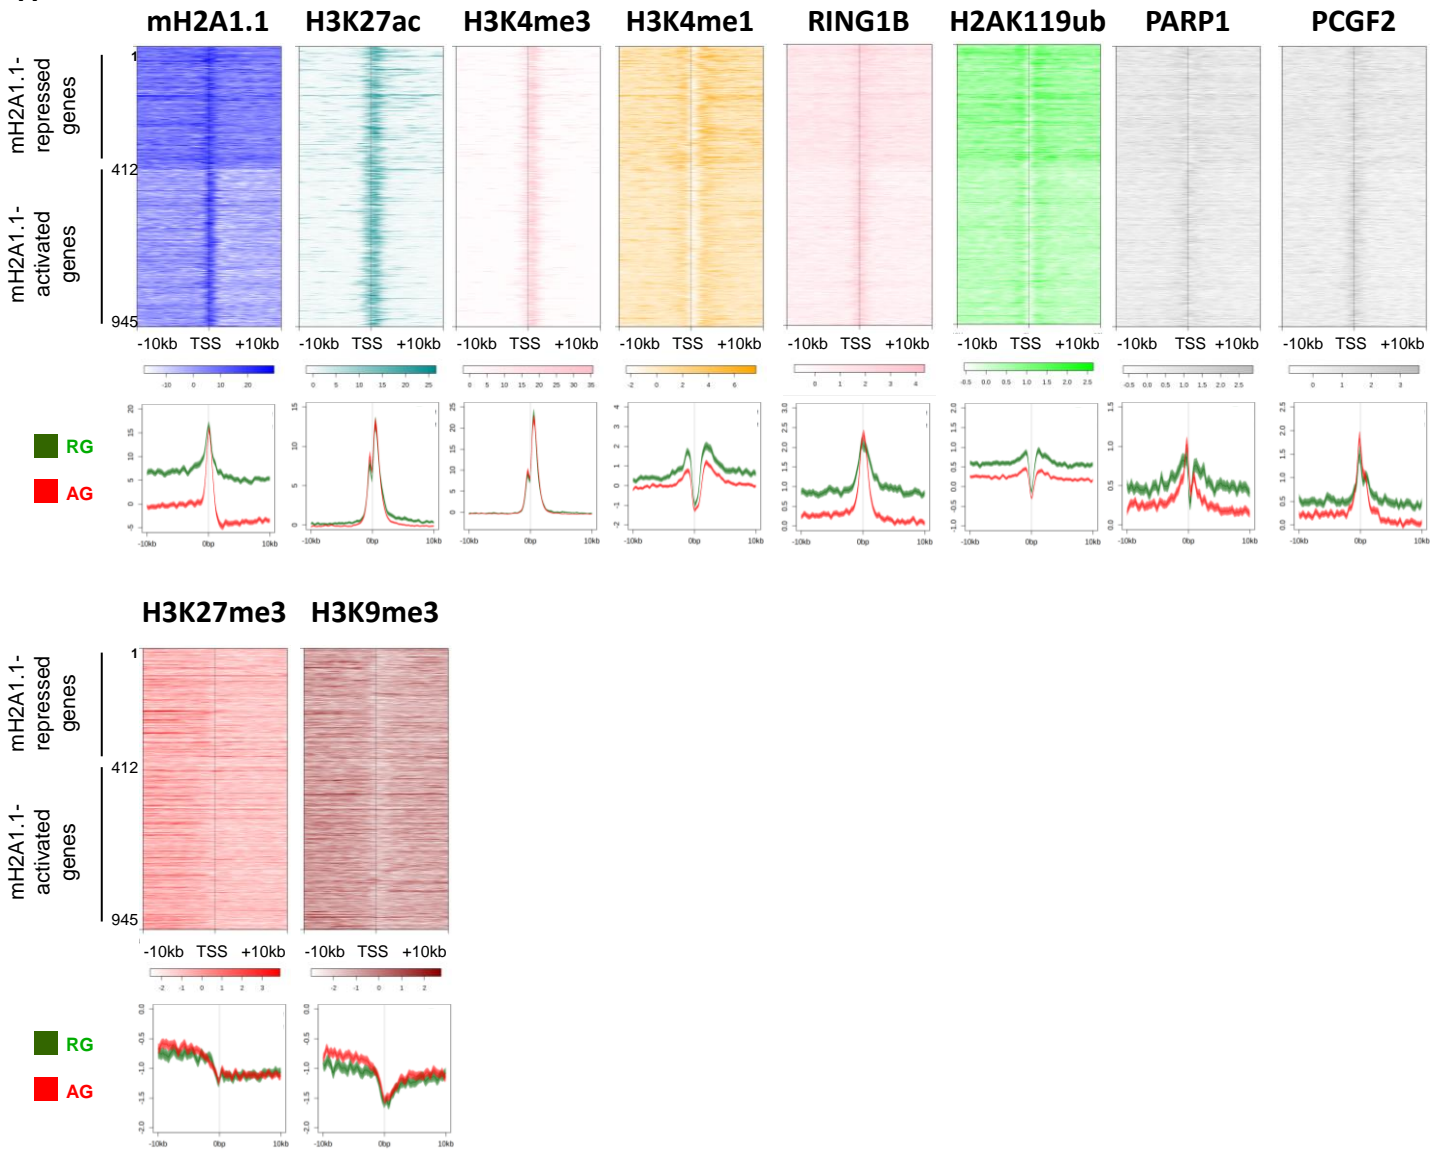

B

• TSS (+/- 50 bp)

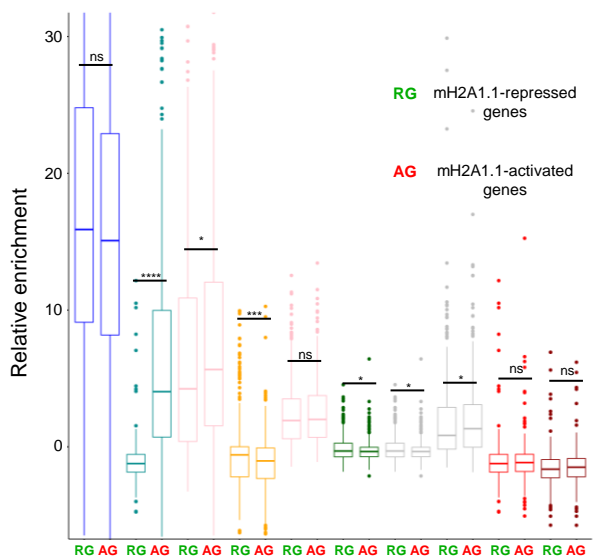

• Gene body (+50 bp – TES)

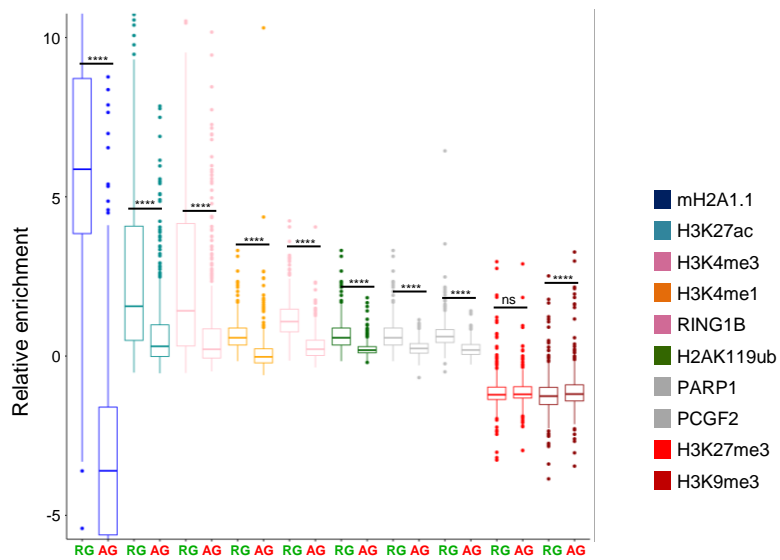





A

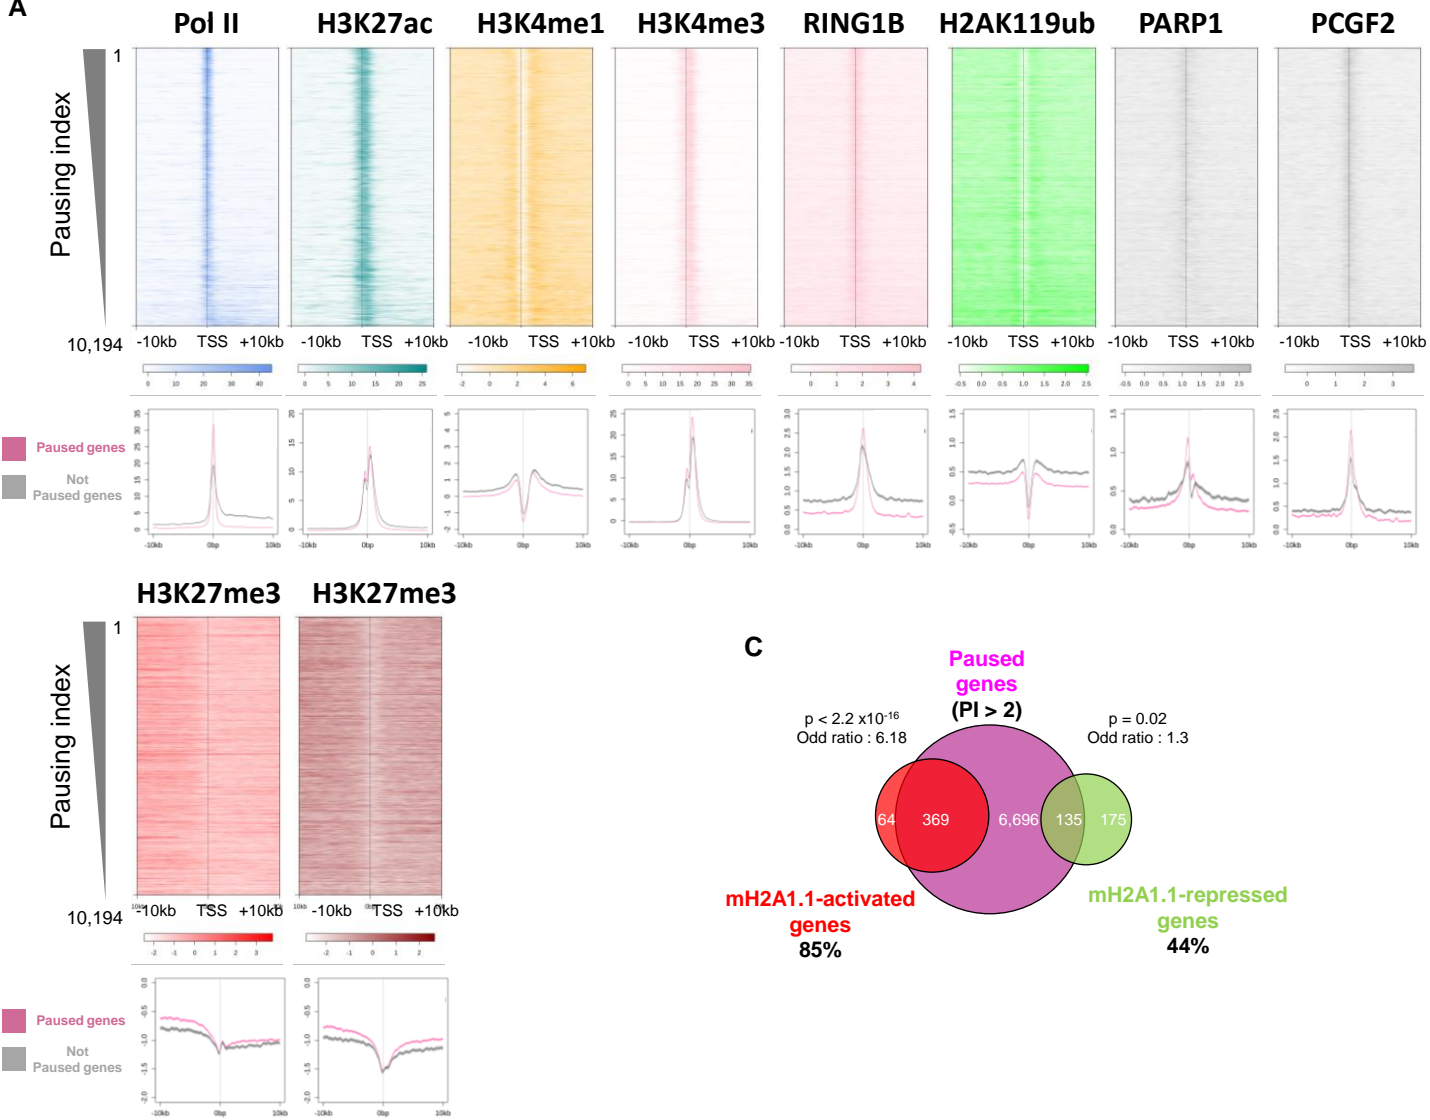

C

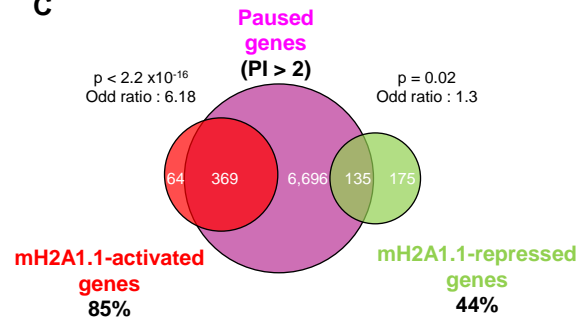

B

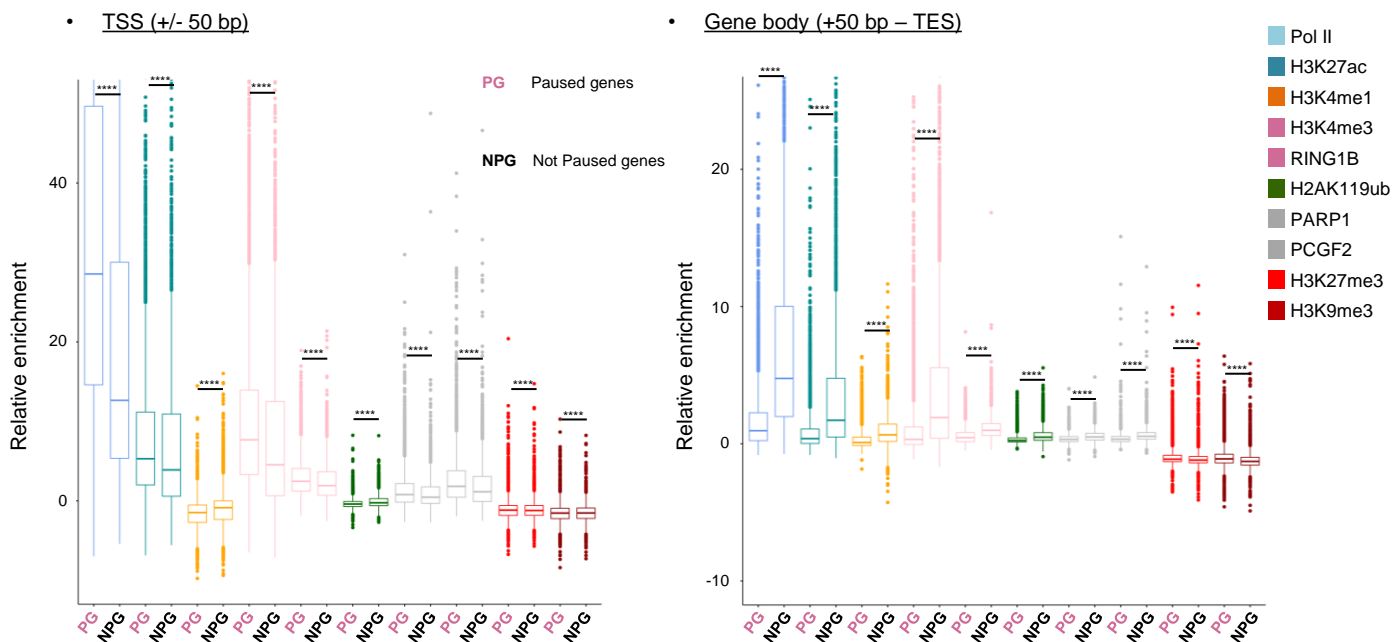

A

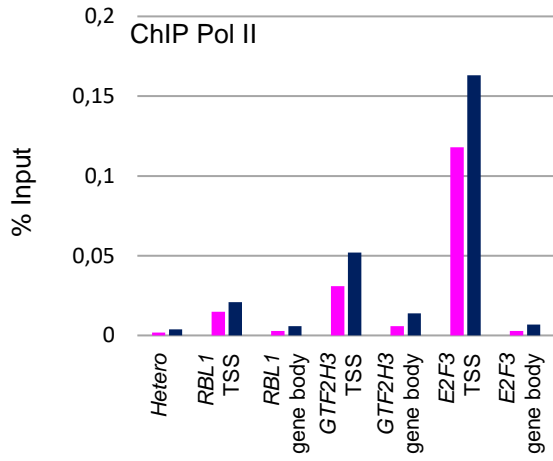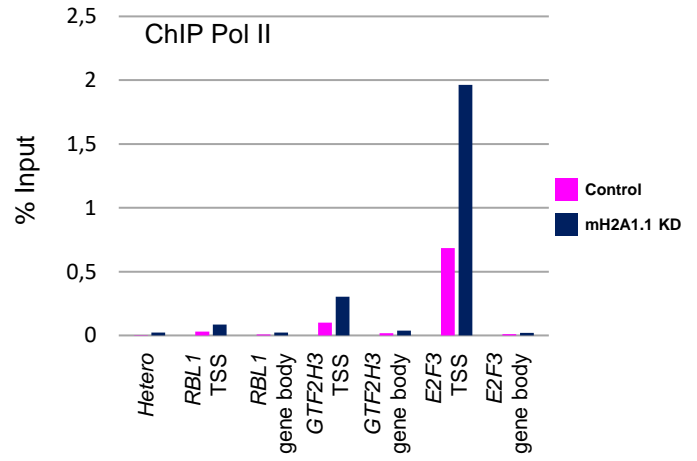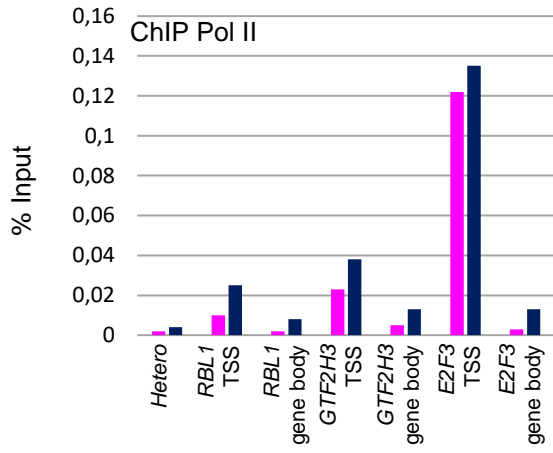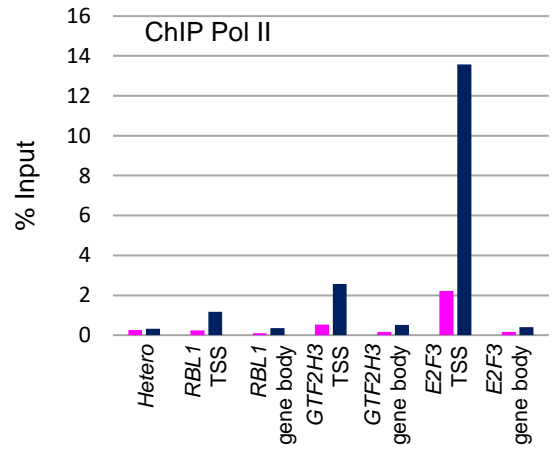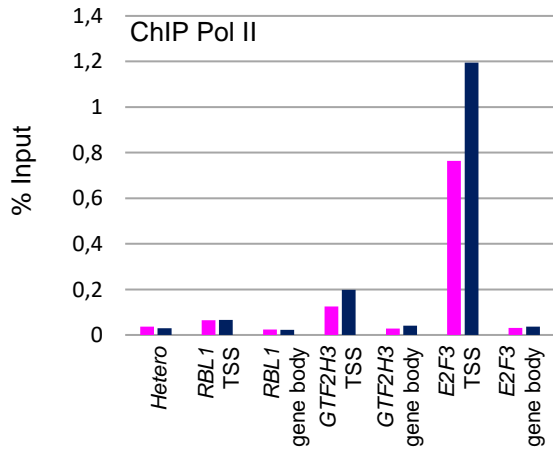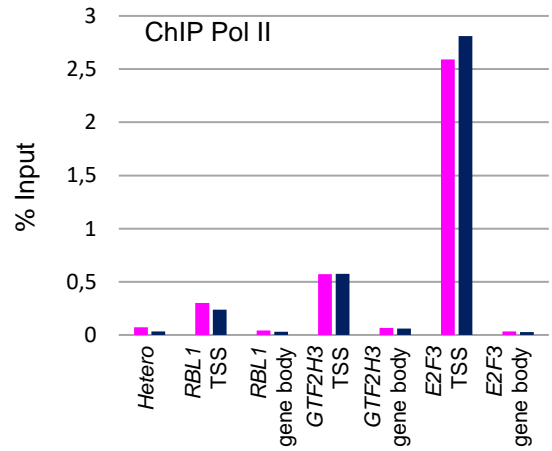

B

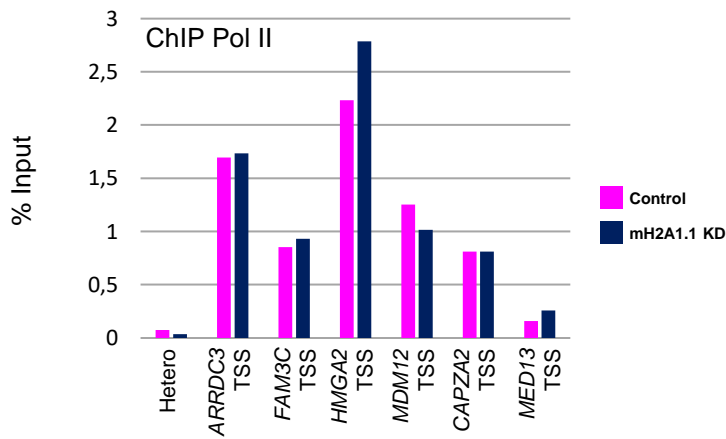

# S11\_Fig

**A**

Enhancers

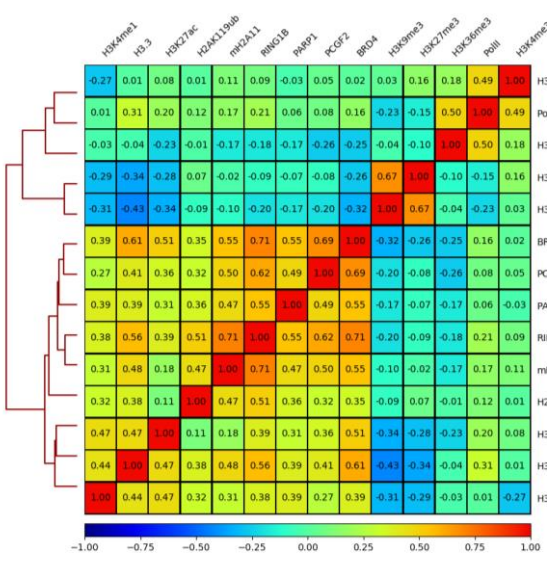

**B**

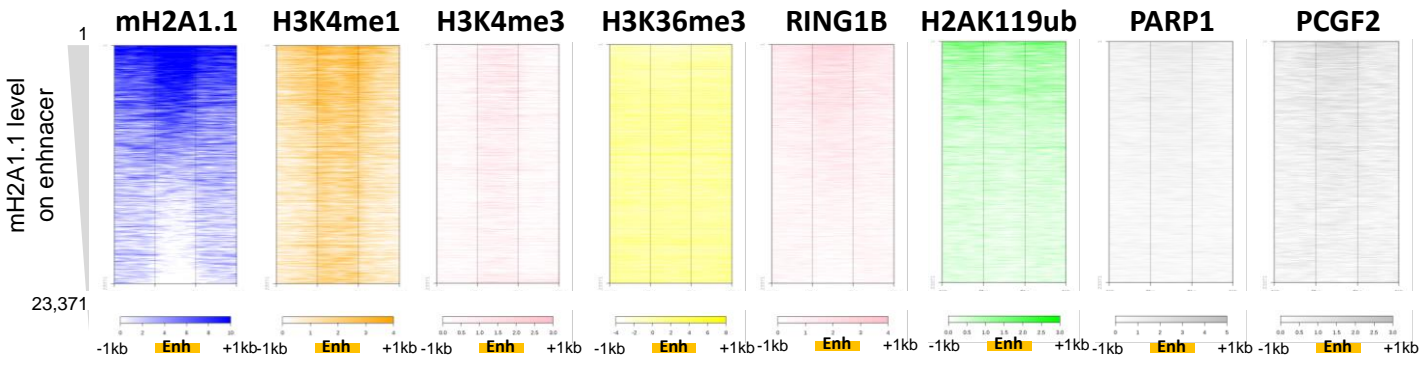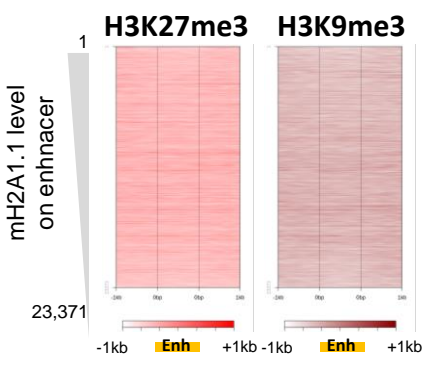

**C** Super-Enhancers

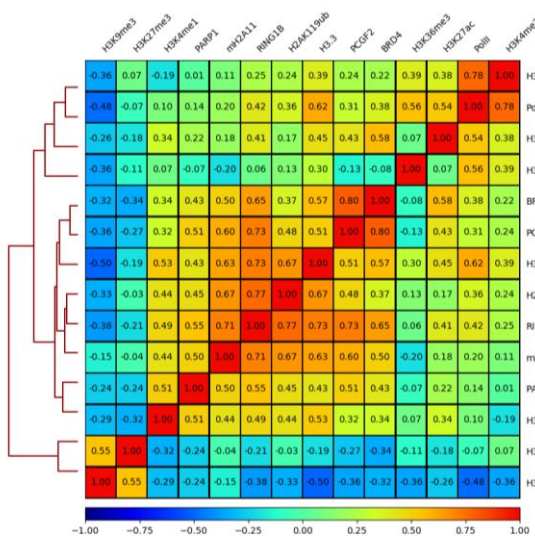

A

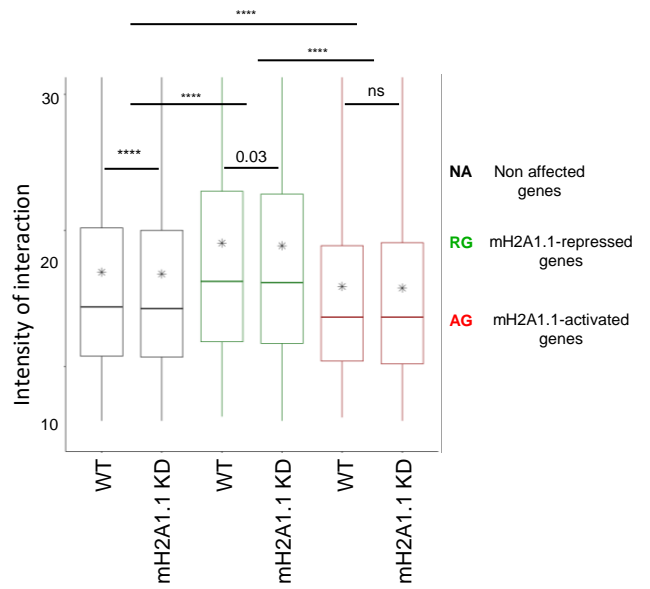

B

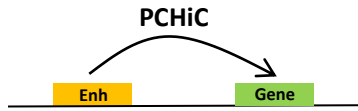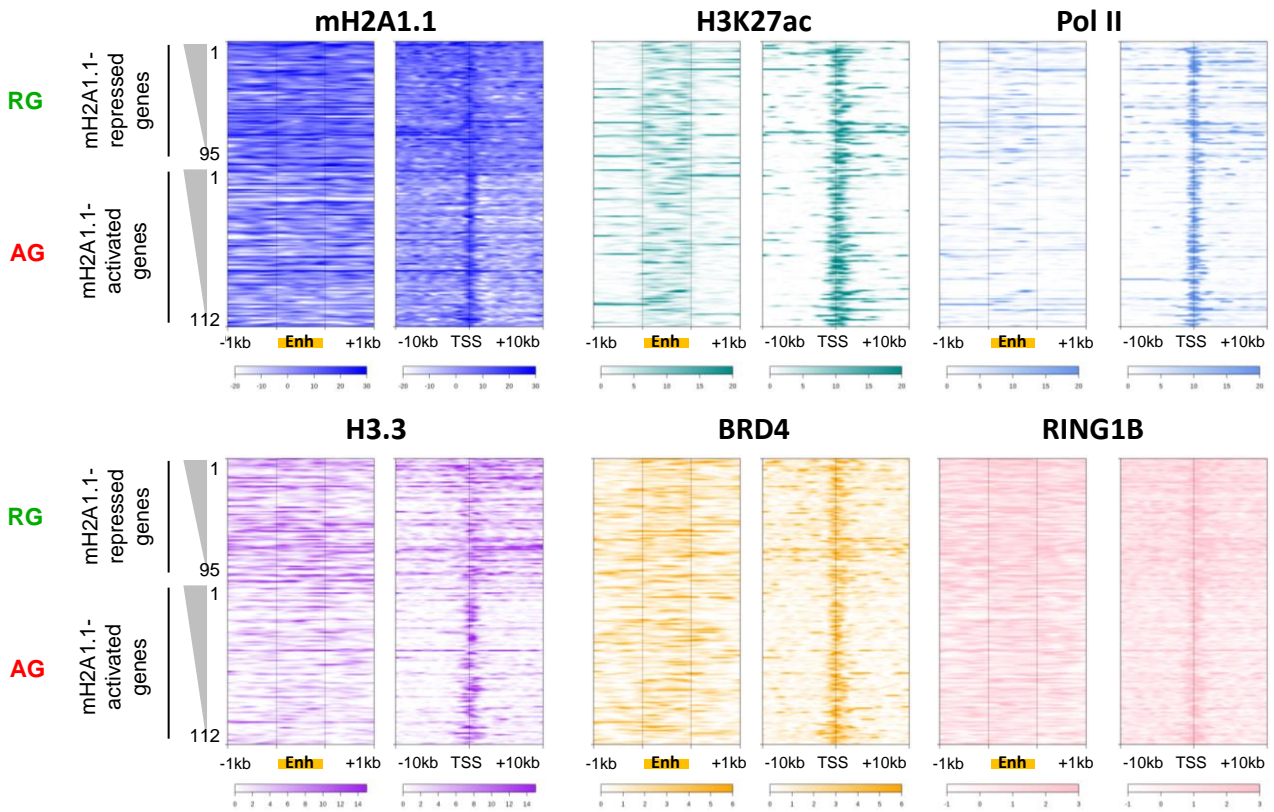C Enhancers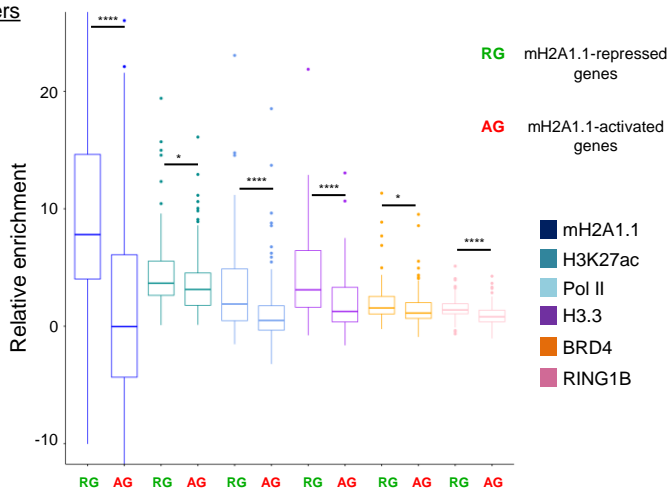

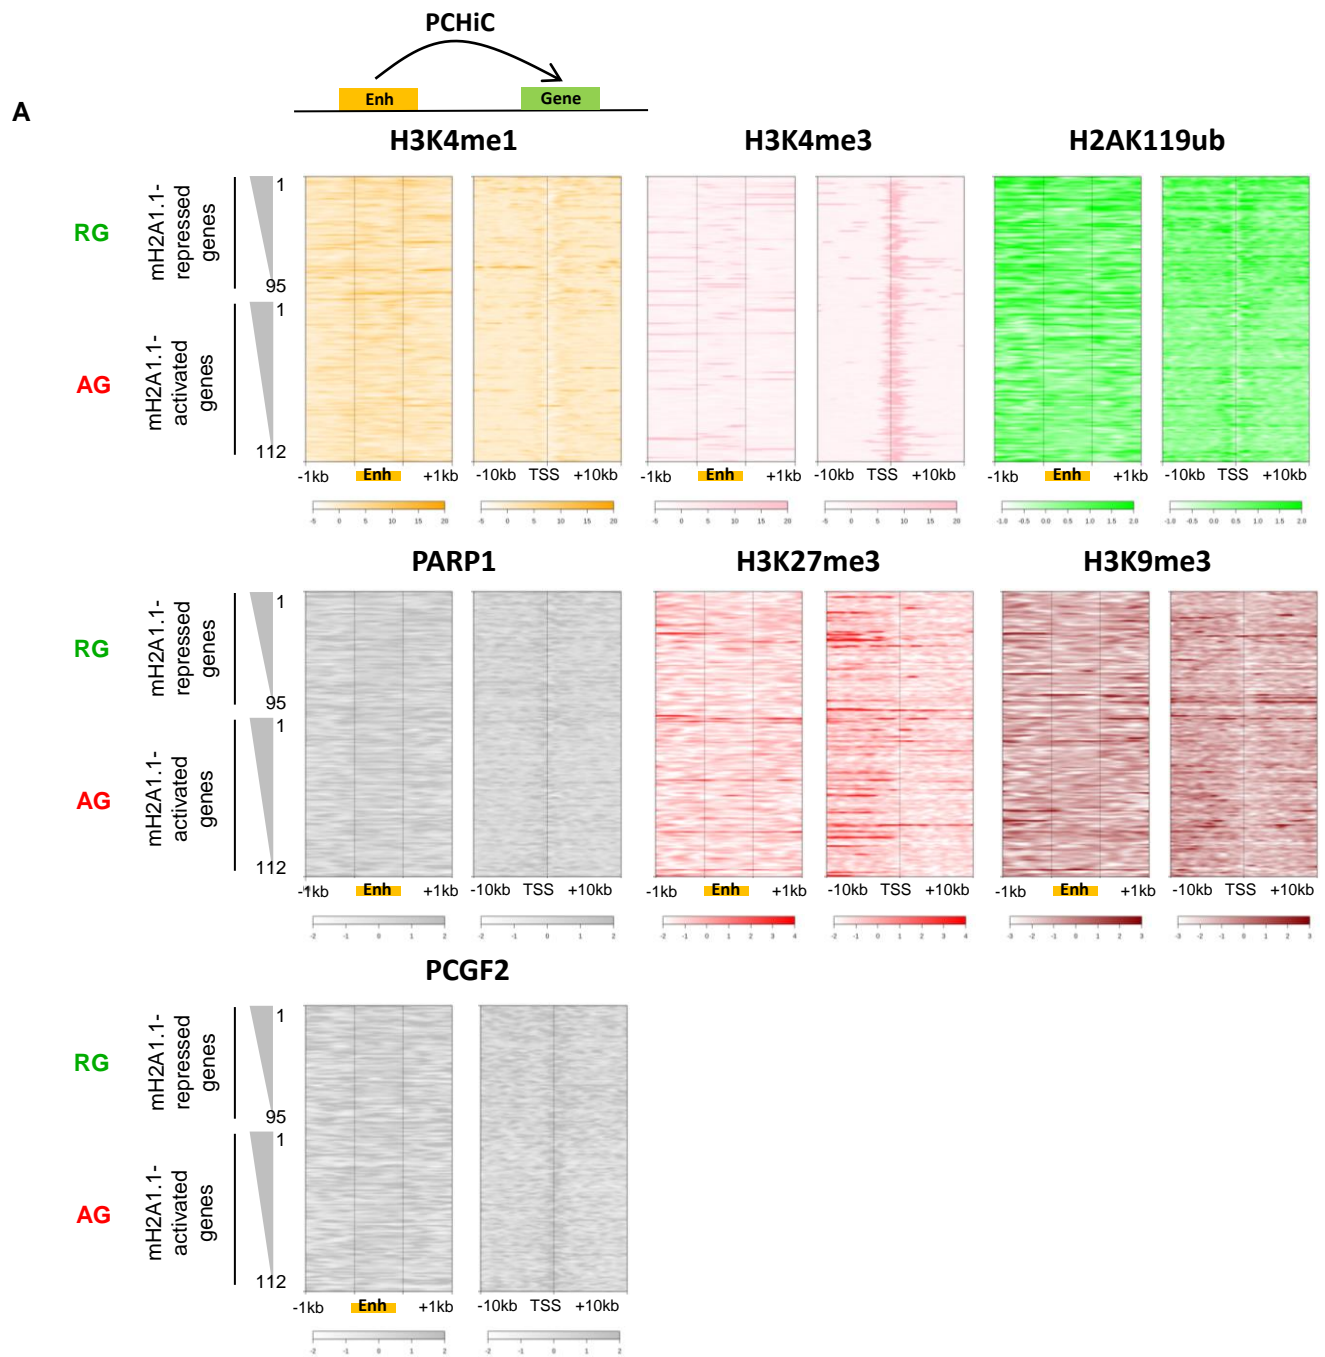

**B** Enhancers

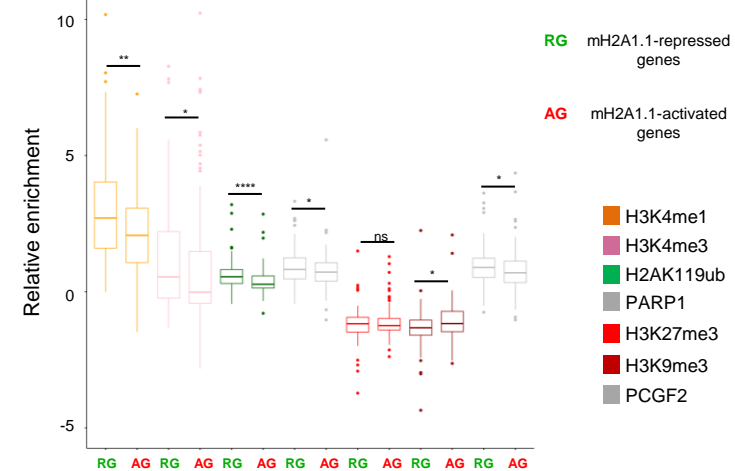



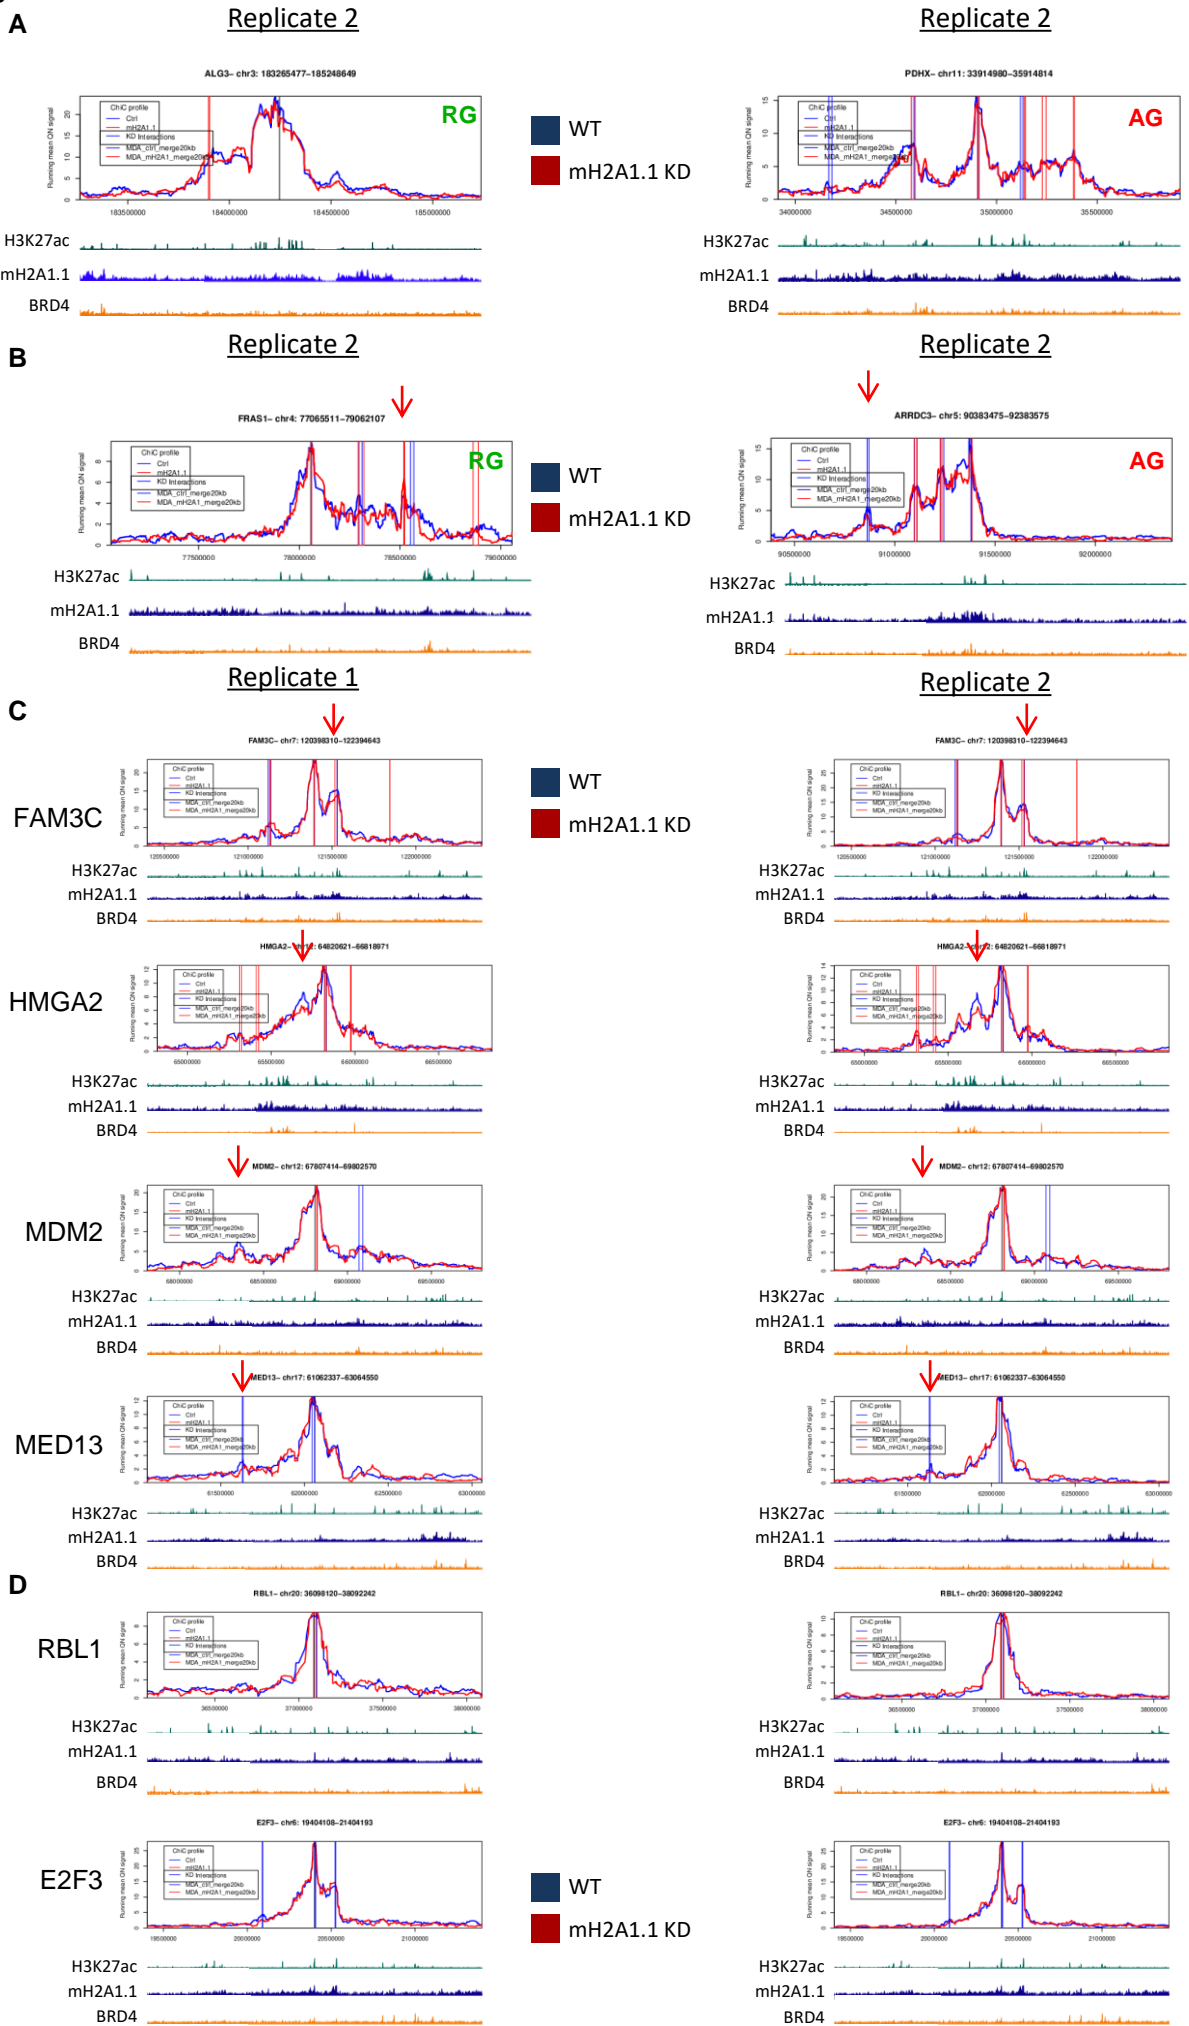



A

## mH2A1.1-activated genes

Biological process

-log(pVal)

0 2 4 6 8 10 12

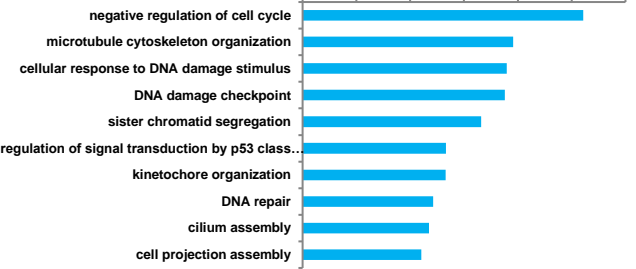

Molecular function

0 2 4 6 8 10

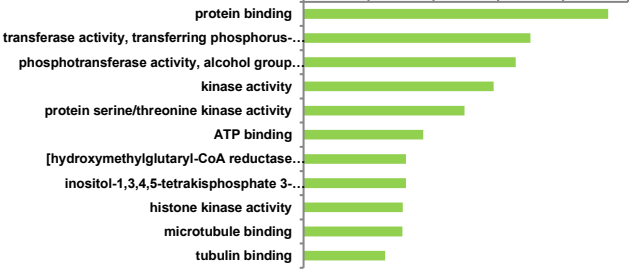

Cellular component

0 2 4 6 8 10 12 14

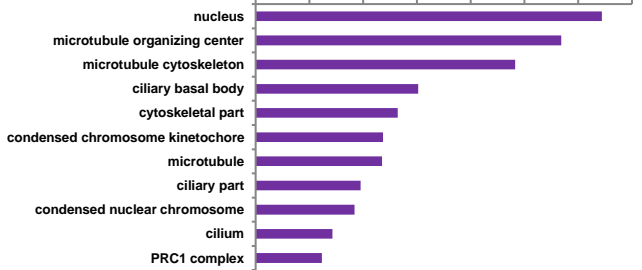

B

## mH2A1.1-repressed genes

Biological process

-log(pVal)

0 1 2 3 4 5 6 7 8

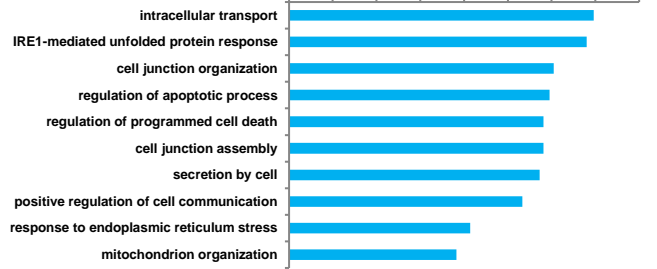

Molecular function

0 2 4 6 8 10 12

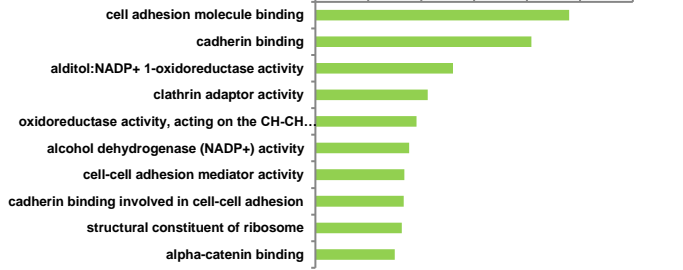

Cellular component

0 2 4 6 8 10 12 14 16

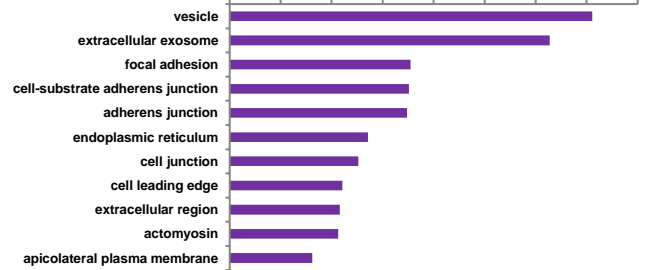

C

## Pausing index

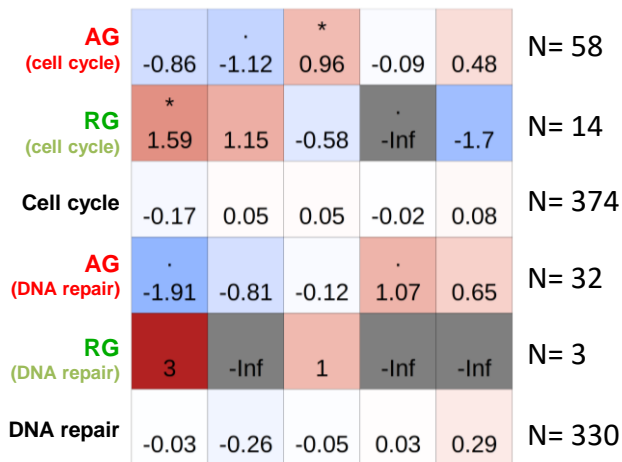

LFC

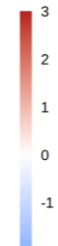

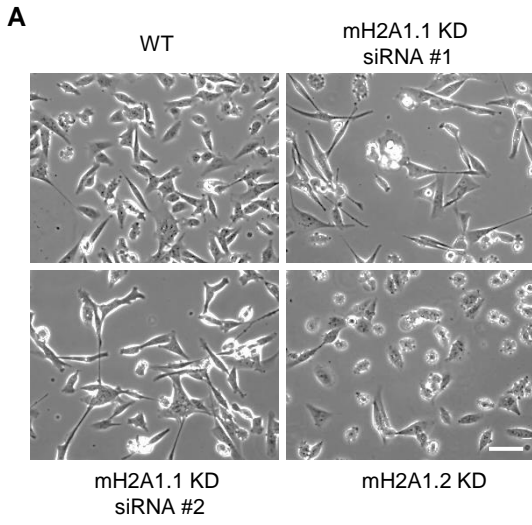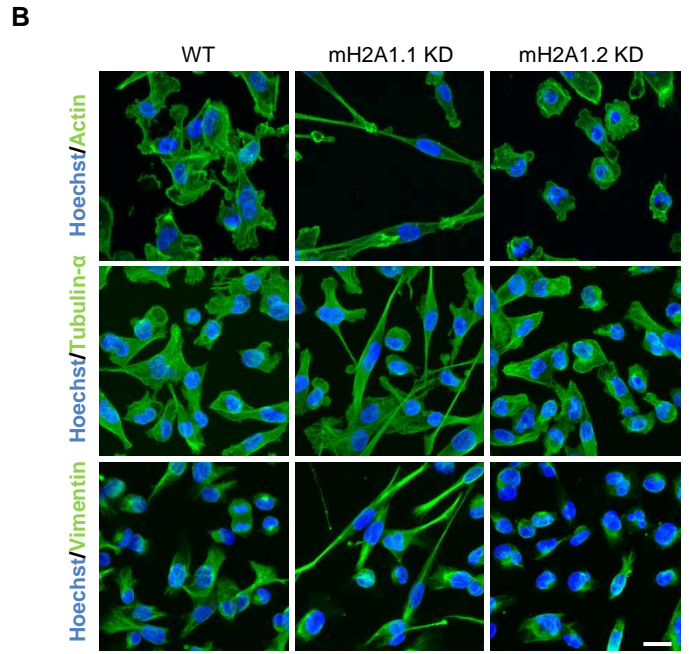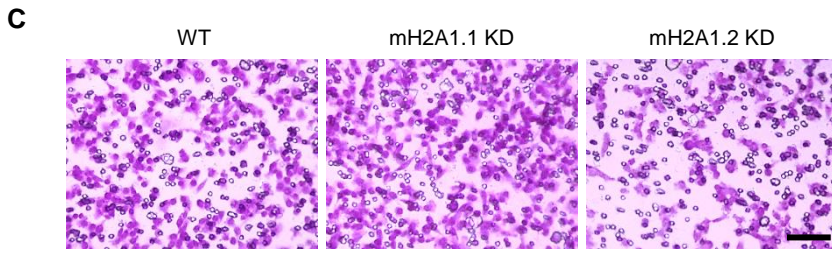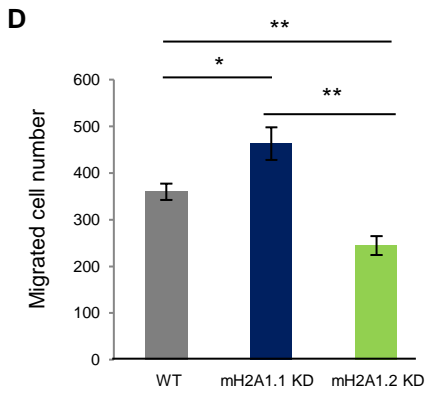

Source: https://www.biorxiv.org/content/biorxiv/early/2021/09/07/2020.01.29.924704.full.pdf
